# Supplementary material for: Zirconium-catalysed direct substitution of alcohols: enhancing the selectivity by kinetic analysis
Source: Royal Society of Chemistry journal article supplement (doi:10.1039/d1cy01219c), 2021-01-01
Supplement: d1cy01219c1.pdf [file d1cy01219c1.pdf]

## Supporting Information

### ***Zirconium-Catalysed Direct Substitution of Alcohols: Enhancing the Selectivity by Kinetic Analysis***

**Authors:** Cristiana Margarita, Piret Villo, Oscar Dalla-Santa, Hernando Tuñon, David Camaj,<sup>‡</sup> Robin Carlsson,<sup>‡</sup> Malin Lill,<sup>‡</sup> Anja Ramström<sup>‡</sup> and Helena Lundberg\*

\*Correspondence to Helena Lundberg ([hellundb@kth.se](mailto:hellundb@kth.se))

<sup>‡</sup> Indicates equal contribution

**Affiliation:** Department of Chemistry, KTH Royal Institute of Technology, Teknikringen 30, S-10044 Stockholm, Sweden

### Table of Contents

|                                                                                                         |    |
|---------------------------------------------------------------------------------------------------------|----|
| 1. General Information .....                                                                            | 2  |
| 2. Kinetic evaluation of reaction parameters .....                                                      | 3  |
| 2.1. Reproducibility .....                                                                              | 3  |
| 2.2. Control experiments .....                                                                          | 4  |
| 2.3. Different excess experiments .....                                                                 | 5  |
| 2.4. Determination of order in [reactants] .....                                                        | 6  |
| 2.5. Different [catalyst] experiments .....                                                             | 9  |
| 2.6. Determination of catalyst order .....                                                              | 10 |
| 2.7. Same excess experiments .....                                                                      | 11 |
| 2.8. Catalyst comparisons .....                                                                         | 11 |
| 2.9. Substitution effects .....                                                                         | 15 |
| 2.10. Transesterification .....                                                                         | 16 |
| 2.11. COPASI kinetic modeling .....                                                                     | 21 |
| 3. NMR study of catalyst .....                                                                          | 26 |
| 4. General procedures .....                                                                             | 29 |
| 4.1. General etherification procedure for kinetic analysis (A) .....                                    | 29 |
| 4.2. General substitution procedure for product isolation (B) .....                                     | 29 |
| 4.3. General substitution procedure for product isolation with sequential addition of alcohol (C) ..... | 29 |
| 4.4. Synthetic details and analytical data for products 2a-2y', 3a-3f, 4a-4c .....                      | 29 |
| 5. Unsuccessful substitutions .....                                                                     | 40 |
| 6. References .....                                                                                     | 41 |
| 7. <sup>1</sup> H-NMR and <sup>13</sup> C-NMR spectra for compounds 2a-2y', 3a-3f, 4a-4c .....          | 42 |
| 8. HPLC chromatograms .....                                                                             | 79 |

## 1. General Information

All reactions were carried out in glassware that was not pre-dried unless otherwise stated. THF was dried using a solvent dispensing system, where solvent is passed through activated alumina columns, stored under N<sub>2</sub> and over activated 4Å molecular sieves when needed. BTF denoted as *dry* was distilled under N<sub>2</sub> and stored over activated 4Å molecular sieves. Water used for reactions and HPLC analysis was obtained from Milli-Q® system. Trifluoromethanesulfonic acid (triflic acid, TfOH) was stored and handled under N<sub>2</sub> atmosphere, using Hamilton syringes. Molecular sieves (3Å, powder) were heat gun-dried under vacuum for 20 minutes and cooled under N<sub>2</sub> prior to use. All other solvents and reagents were purchased from commercial suppliers and used without further purification unless otherwise noted. TLC analyses were performed on pre-coated silica gel 60 F254 plates, and visualized using UV light, KMnO<sub>4</sub> (solution in mixture of KMnO<sub>4</sub>/K<sub>2</sub>CO<sub>3</sub>/NaOH in H<sub>2</sub>O), phosphomolybdic acid stain (solution in EtOH) or vanillin (solution in 1% H<sub>2</sub>SO<sub>4</sub> in EtOH). Flash column chromatography was conducted using 40-60 µm, 230-400 mesh, 60Å silica gel as stationary phase. NMR spectra were recorded using either a Bruker Avance II 400 MHz or a Bruker Avance 500 MHz spectrometer at 298 K (unless otherwise stated, see Section 3) using CDCl<sub>3</sub>, acetone-d<sub>6</sub> or toluene-d<sub>8</sub> as solvents. Chemical shifts are given in ppm relative to the residual solvent peak (<sup>1</sup>H NMR: CDCl<sub>3</sub> δ 7.26; acetone-d<sub>6</sub> δ 2.05; toluene-d<sub>8</sub> δ 2.09; <sup>13</sup>C NMR: CDCl<sub>3</sub> δ 77.16; acetone-d<sub>6</sub> δ 29.84; toluene-d<sub>8</sub> δ 20.40) with multiplicity (br = broad, s = singlet, d = doublet, t = triplet, q = quartet, quin = quintuplet, sext = sextet, m = multiplet), coupling constants (in Hz) and integration. Kinetic data was analysed by Agilent 1260 Infinity Quaternary LC (Eclipse Plus 18C column) with a gradient of acetonitrile and 0.1% formic acid in Milli-Q water at a flow rate of 1.0 mL/min, using 4,4'-di-*tert*-butylbiphenyl (DTBB) as internal standard. HPLC with a chiral stationary phase was performed using a Chiralcel OJ-RH column with eluent compositions specified for the products (Section 4.4). High-resolution mass spectrometry analyses were performed using a Thermo Scientific Q Exactive HF Hybrid Quadrupole-Orbitrap HESI. Full analytical data is given if the compound is novel.

## 2. Kinetic evaluation of reaction parameters

The kinetic experiments were carried out in accordance with general procedure A (Section 4.1). Comprehensive tutorials of “different excess” and “same excess” experiment are found in the Reaction Progress Kinetic Analysis literature,<sup>1</sup> whereas detailed information about retrieval of orders in catalyst and reagents are found in the Visual Time Normalization Analysis literature.<sup>2</sup>

### 2.1. Reproducibility

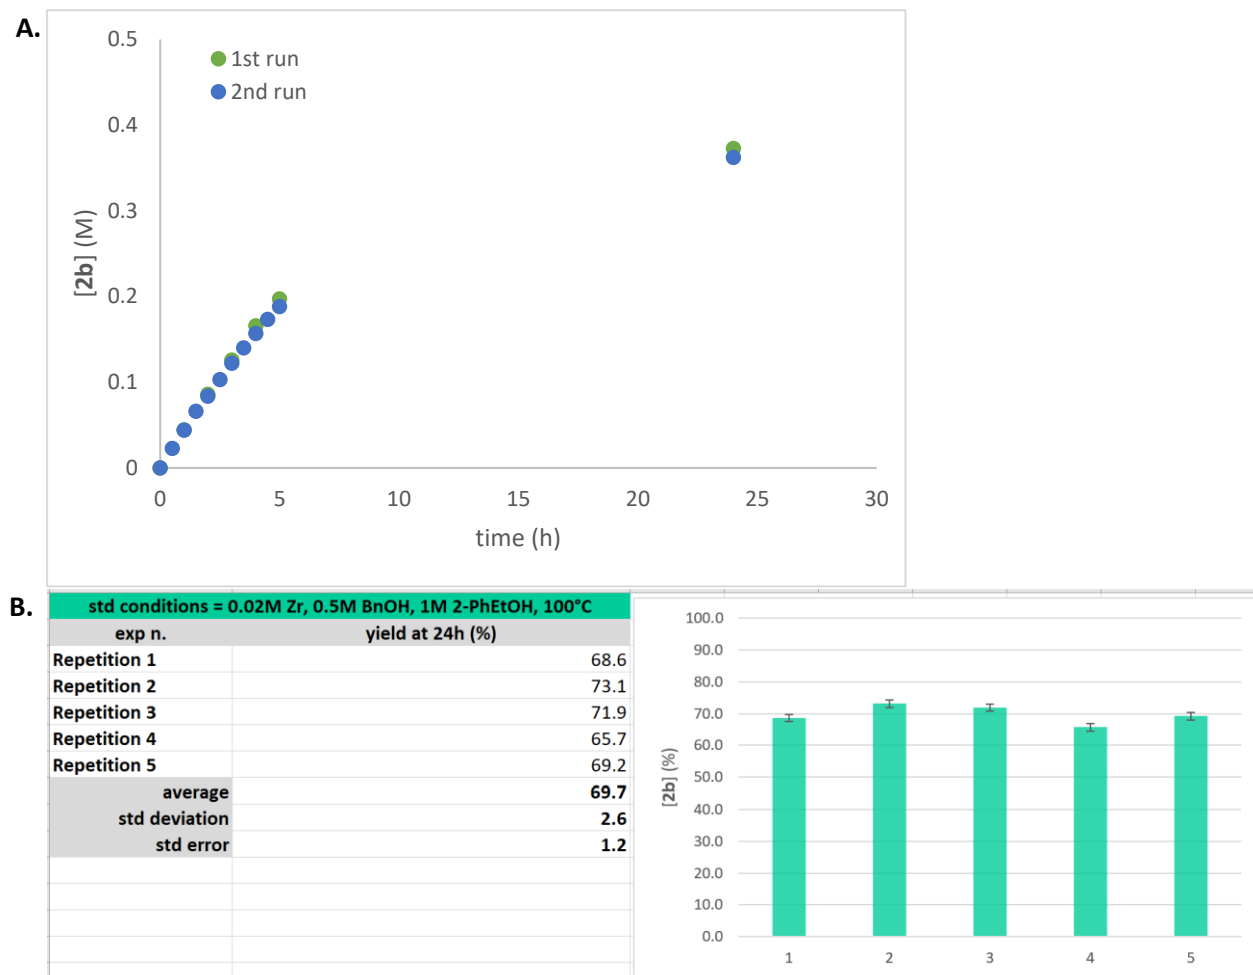

**Figure S1. A.** Reproducibility of standard conditions (0.02 M  $\text{Zr}(\text{Cp})_2(\text{CF}_3\text{SO}_3)_2 \cdot \text{THF}$ , 0.5 M **1a**, 1 M **1b**, 100 °C, BTF). **B.** Standard deviation (2.6) and error (1.2 %) for five repetitions of identical experiments under standard conditions.

## 2.2. Control experiments

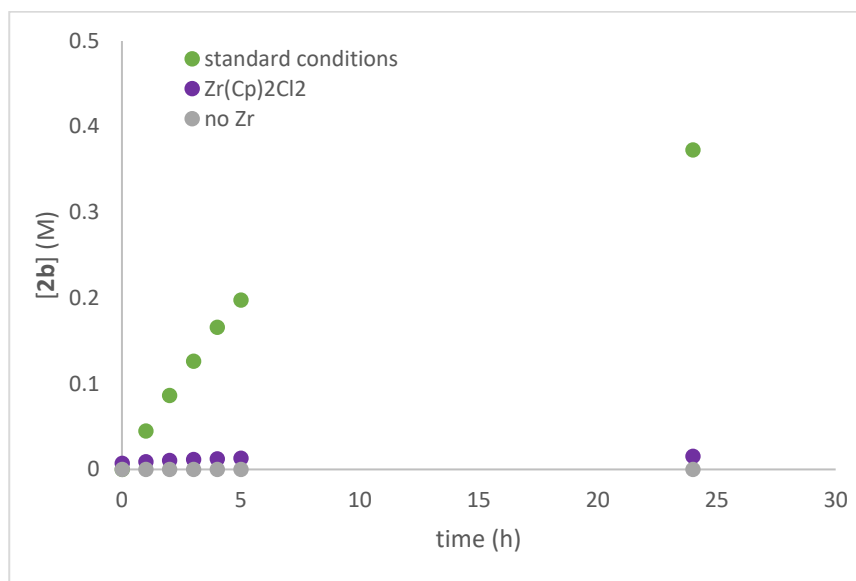

**Figure S2.** Control experiments. Standard conditions: 0.02 M  $\text{Zr}(\text{Cp})_2(\text{CF}_3\text{SO}_3)_2 \cdot \text{THF}$ , 0.5 M **1a**, 1 M **1b**, 100 °C, BTF.

### 2.3. Different excess experiments

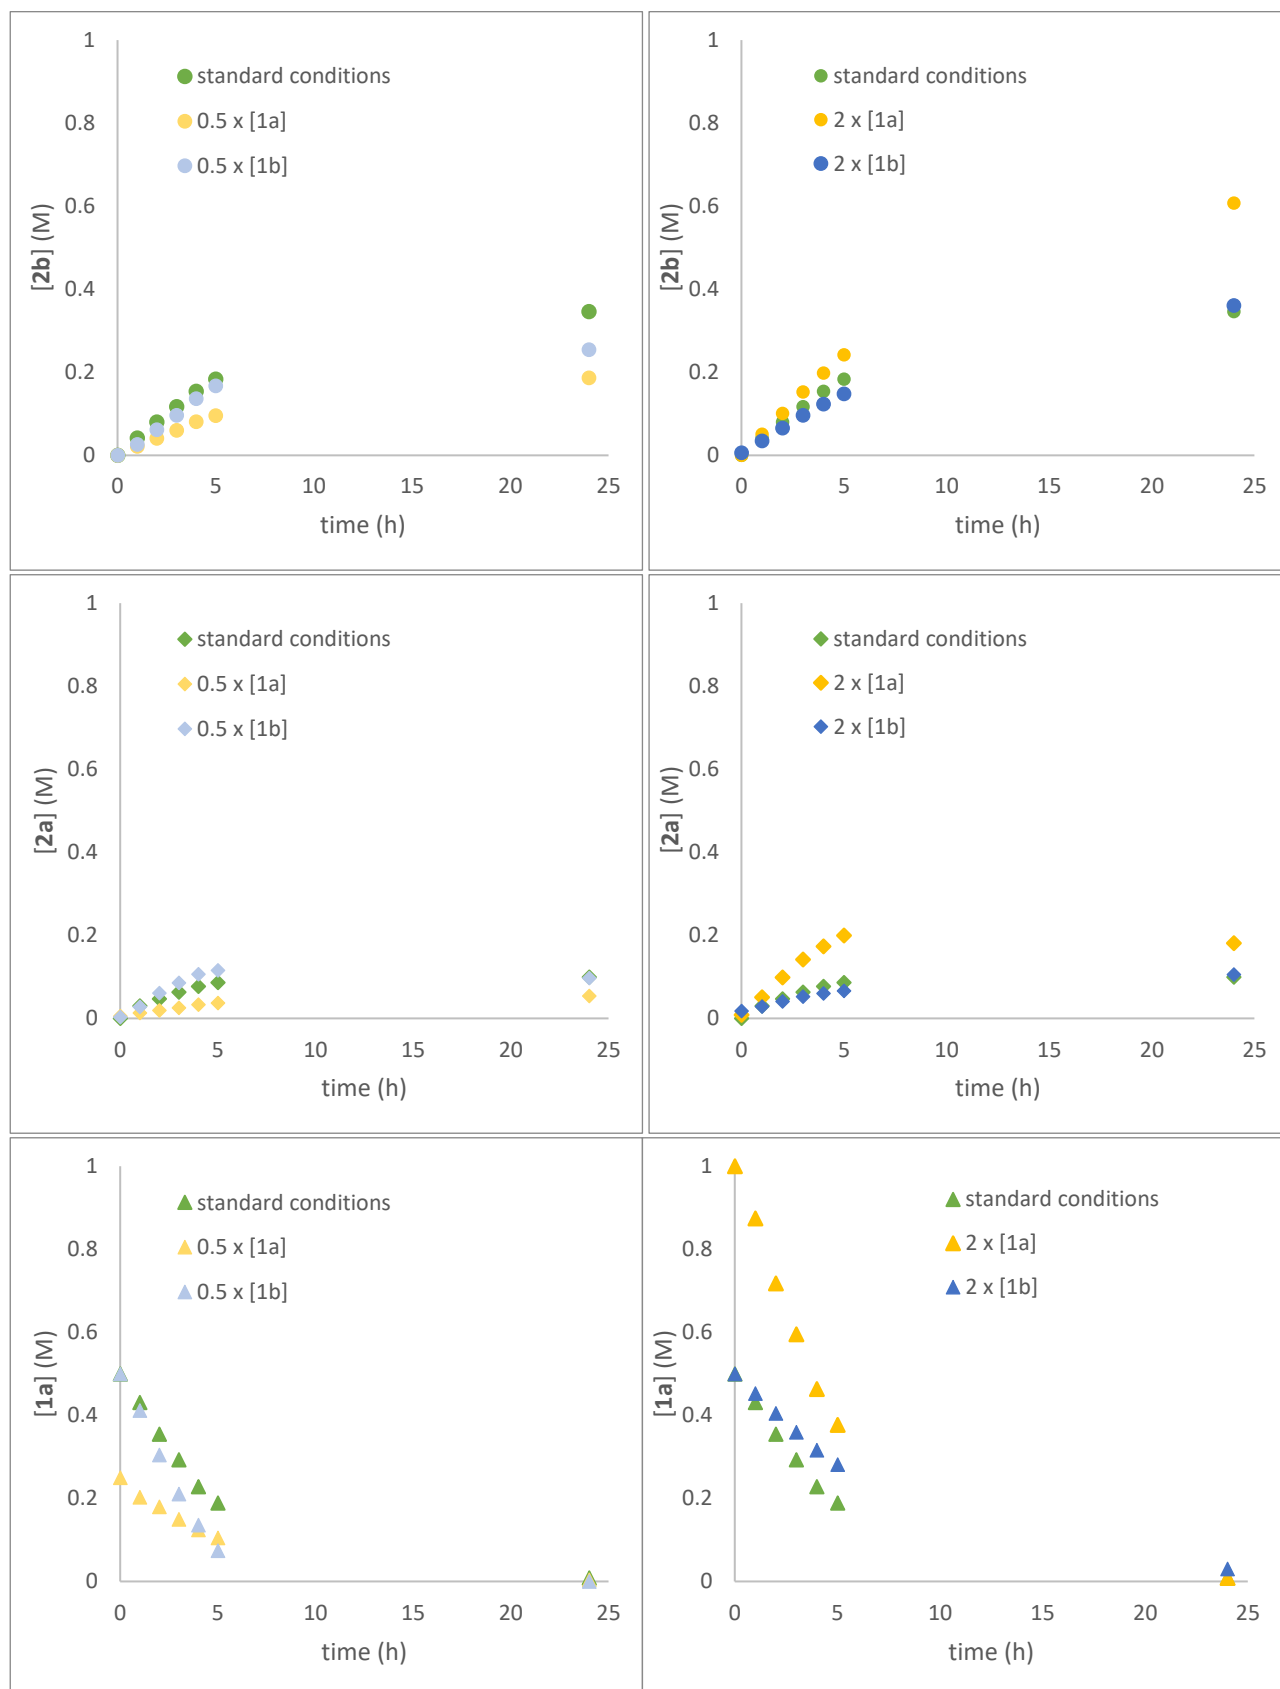

**Figure S3.** Different excess experiments. Standard conditions: 0.02 M  $\text{Zr}(\text{Cp})_2(\text{CF}_3\text{SO}_3)_2 \cdot \text{THF}$ , 0.5 M **1a**, 1 M **1b**, 100 °C, BTF. Values are normalized to  $[\mathbf{1a}]_0$ .

## 2.4. Determination of order in [reactants]

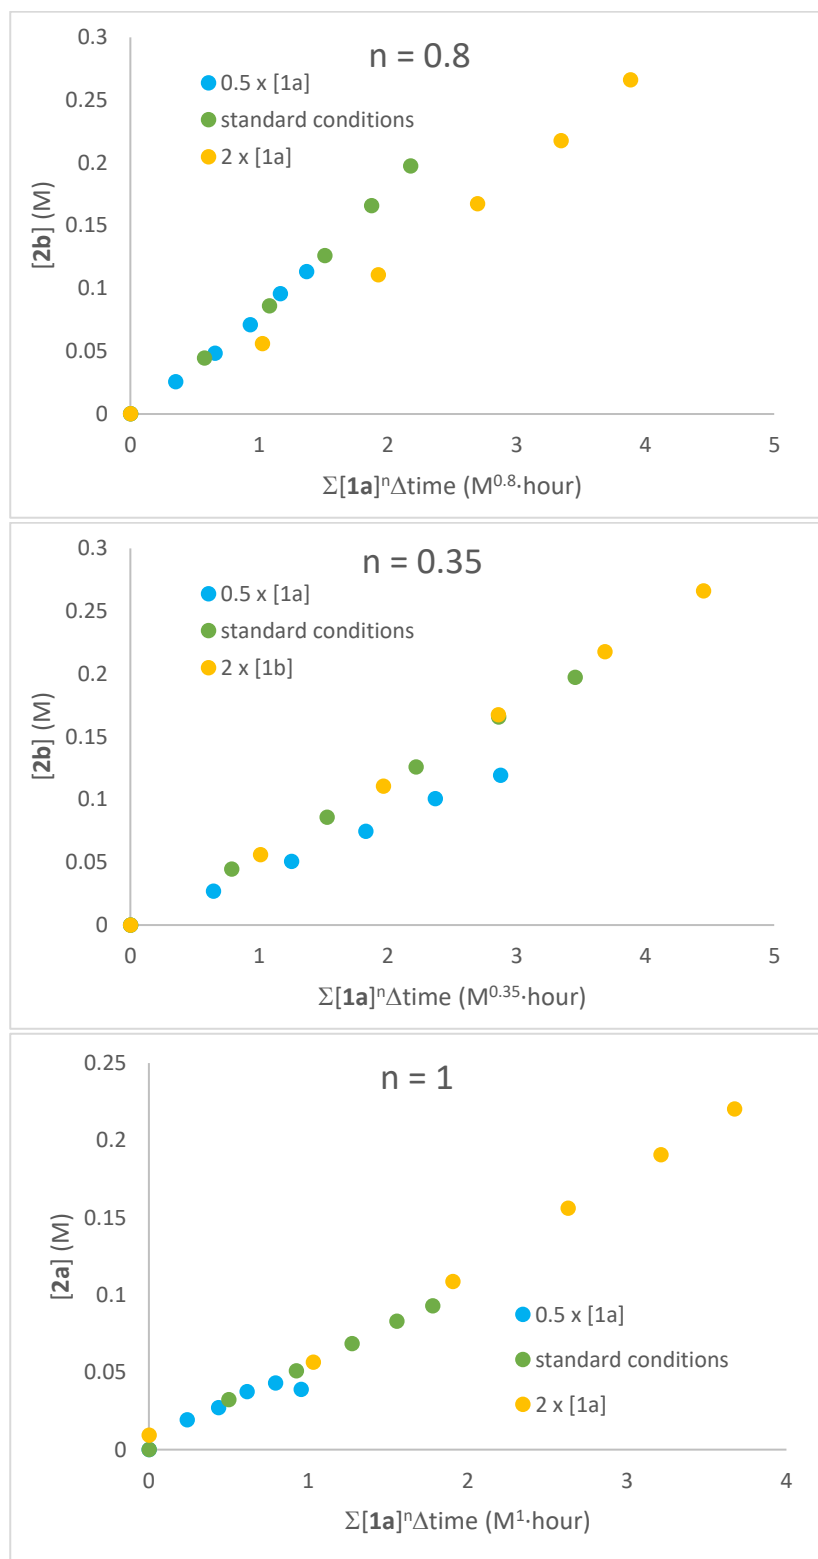

**Figure S4.** Different [BnOH] experiments plotted using Variable Time Normalization Analysis.<sup>2b</sup> Standard conditions: 0.02 M  $\text{Zr(Cp)}_2(\text{CF}_3\text{SO}_3)_2 \cdot \text{THF}$ , 0.5 M **1a**, 1 M **1b**, 100 °C, BTF.

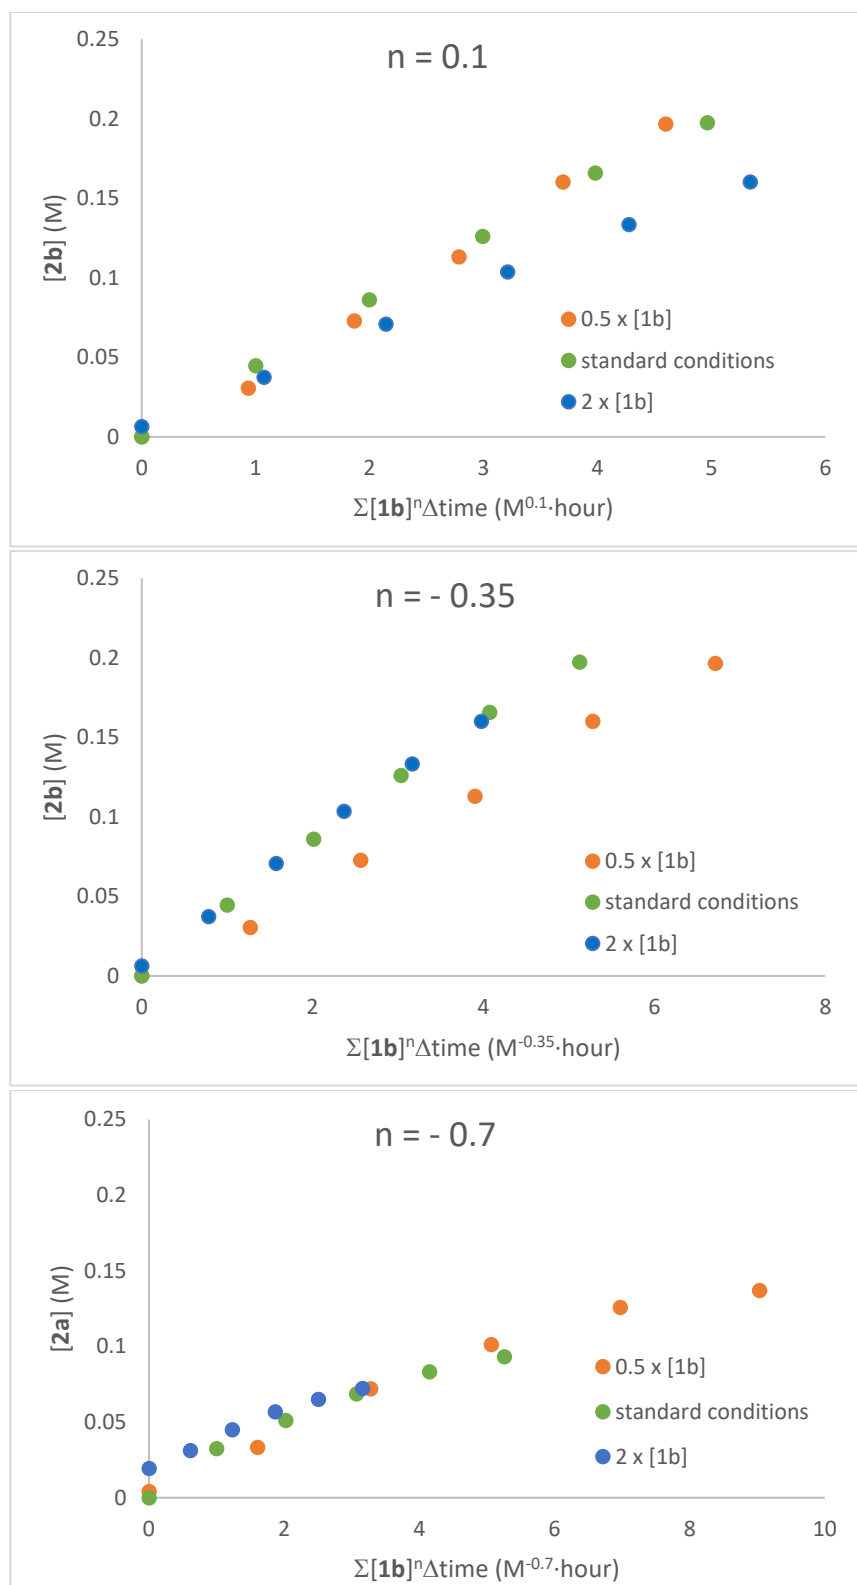

**Figure S5.** Different [2-PhEtOH] experiments plotted using Variable Time Normalization Analysis at 0.5 M concentration of **1a**.<sup>2b</sup> Standard conditions: 0.02 M  $\text{Zr(Cp)}_2(\text{CF}_3\text{SO}_3)_2 \cdot \text{THF}$ , 0.5 M **1a**, 1 M **1b**, 100 °C, BTF.

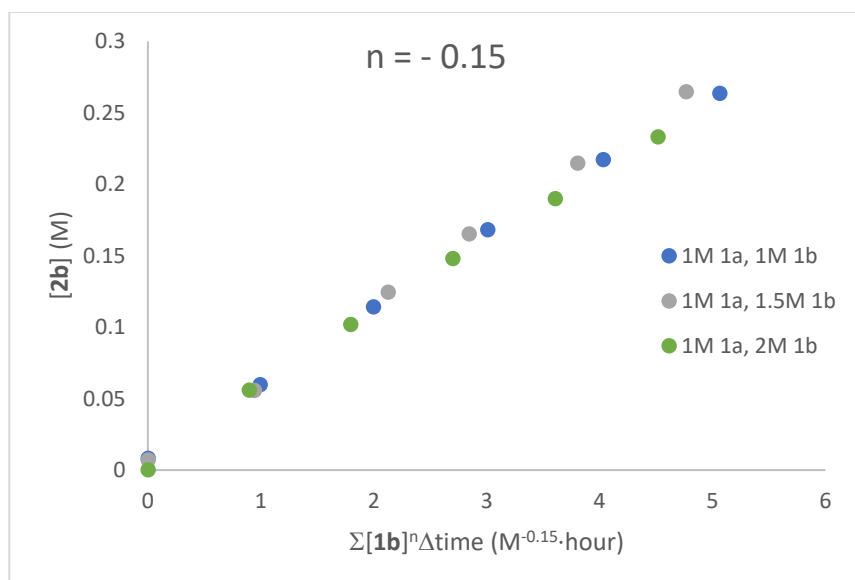

**Figure S6.** Different [2-PhEtOH] experiments plotted using Variable Time Normalization Analysis at 1 M concentration of **1a**.<sup>2b</sup> Conditions: 0.02 M  $\text{Zr(Cp)}_2(\text{CF}_3\text{SO}_3)_2 \cdot \text{THF}$ , 1 M **1a**, 1-2 M **1b**, 100 °C, BTF.

## 2.5. Different [catalyst] experiments

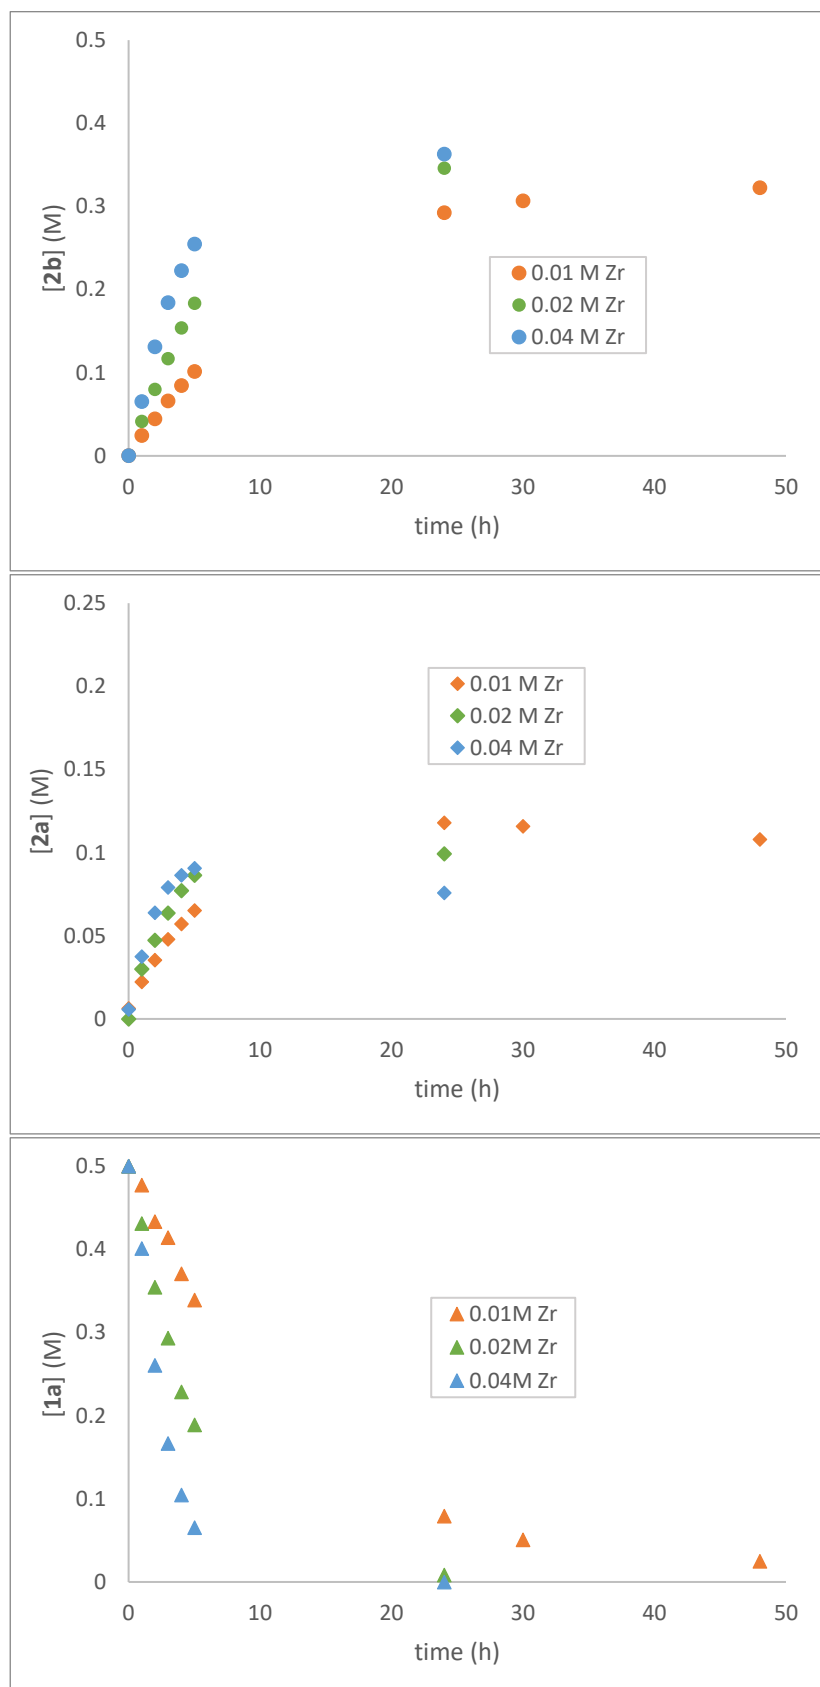

**Figure S7.** Different catalyst concentrations. Conditions: x M  $Zr(Cp)_2(CF_3SO_3)_2 \cdot THF$ , 0.5 M **1a**, 1 M **1b**, 100 °C, BTF. Values are normalized to  $[1a]_0$ .

## 2.6. Determination of catalyst order

The order in catalyst was determined using Variable Time Normalization Analysis.<sup>2a</sup>

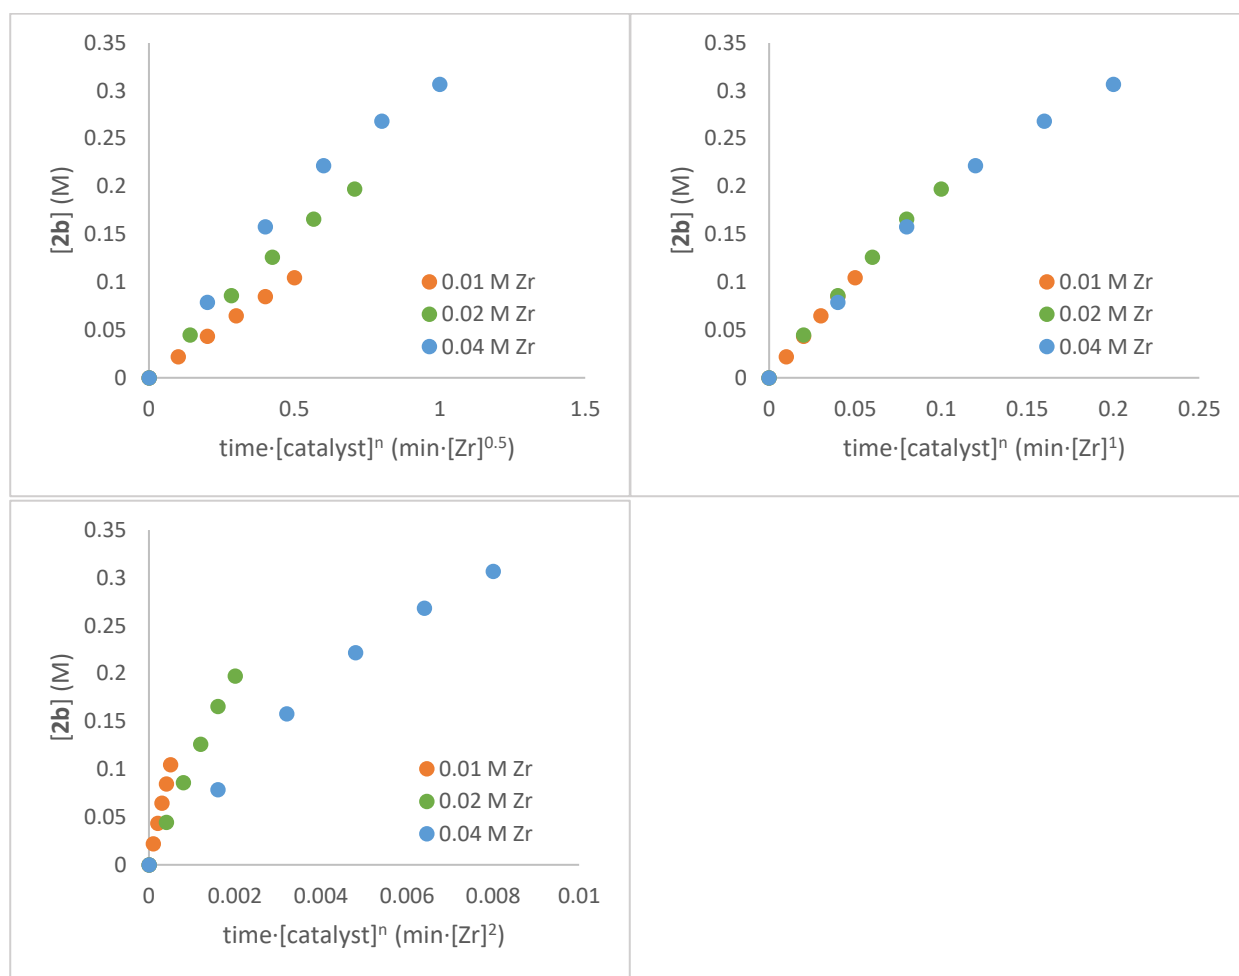

**Figure S8.** Order in [catalyst] for the formation of product **2b** for reaction time 0-5 hours. Conditions: x M Zr(Cp)<sub>2</sub>(CF<sub>3</sub>SO<sub>3</sub>)<sub>2</sub>·THF, 0.5 M BnOH, 1 M 2-PhEtOH, 100 °C, BTF.

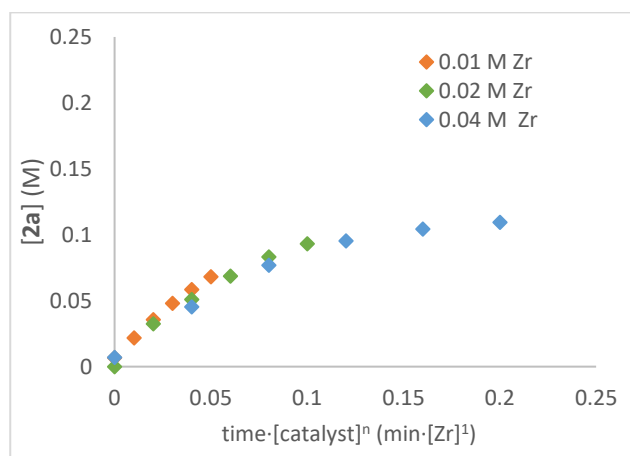

**Figure S9.** Order in [catalyst] for formation of **2a**. Conditions: x M Zr(Cp)<sub>2</sub>(CF<sub>3</sub>SO<sub>3</sub>)<sub>2</sub>·THF, 0.5 M **1a**, 1 M **1b**, 100 °C, BTF.

## 2.7. Same excess experiments

Same excess experiments<sup>1</sup> followed the general etherification procedure A (Section 4.1), with conditions mimicking 25% conversion of benzyl alcohol: 0.375 M benzyl alcohol **1a**, 0.875 M 2-phenylethanol **1b**, 0.02 M  $\text{Zr}(\text{Cp})_2(\text{CF}_3\text{SO}_3)_2 \cdot \text{THF}$ , 0.01 M DTBB as internal standard, BTF, 100°C; and same excess conditions mimicking 25% conversion of benzyl alcohol with addition of the corresponding amount of  $\text{H}_2\text{O}$  at the outset of the reaction: 0.125 M Milli-Q  $\text{H}_2\text{O}$ , 0.375 M benzyl alcohol **1a**, 0.875 M 2-phenylethanol **1b**, 0.02 M  $\text{Zr}(\text{Cp})_2(\text{CF}_3\text{SO}_3)_2 \cdot \text{THF}$ , 0.01 M DTBB as internal standard, BTF, 100°C. Values for **1a** are normalized to  $[\mathbf{1a}]_0$ .

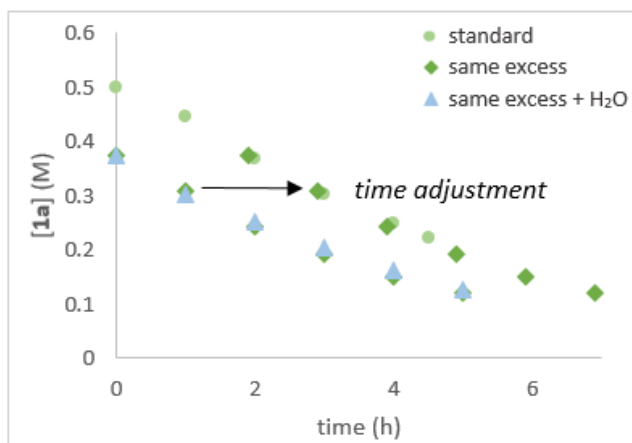

**Figure S10.** Same excess experiments. Standard conditions: 0.02 M  $\text{Zr}(\text{Cp})_2(\text{CF}_3\text{SO}_3)_2 \cdot \text{THF}$ , 0.5 M **1a**, 1 M **1b**, 0.01 M DTBB as internal standard, 100 °C, BTF (0.5 mmol BnOH scale).

## 2.8. Catalyst comparisons

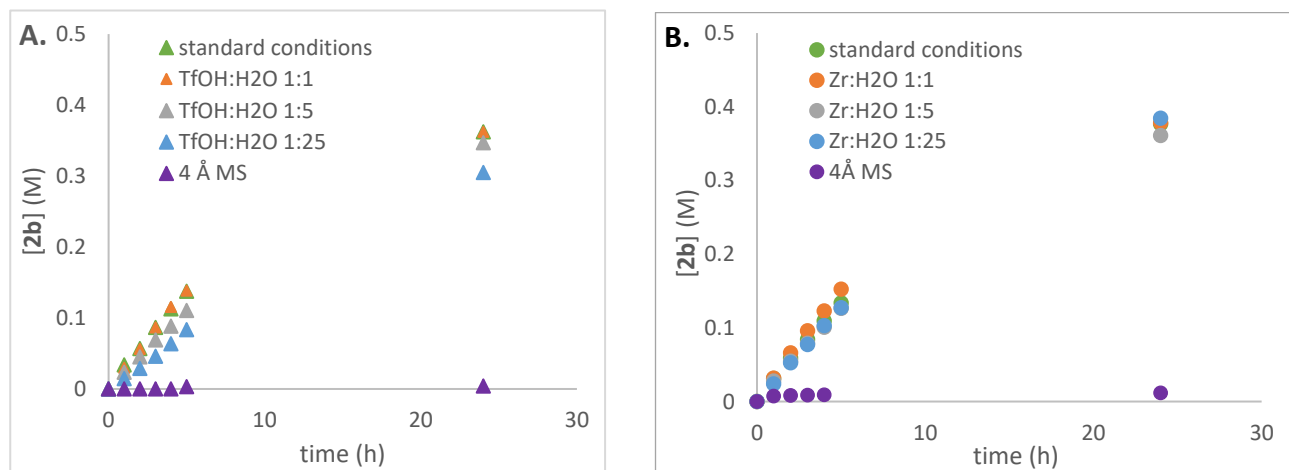

**Figure S11. A.** Reaction behavior in presence of trifluoromethanesulfonic acid in catalytic amounts. **B.** Reaction behavior in presence of zirconocene triflate in catalytic amounts. Standard conditions: 0.02 M  $\text{CF}_3\text{SO}_3\text{H}$  or  $\text{Zr}(\text{Cp})_2(\text{CF}_3\text{SO}_3)_2 \cdot \text{THF}$ , 0.5 M **1a**, 1 M **1b**, 100 °C, BTF (1.5 mmol BnOH scale, 4 Å MS 45 mg, except 4 Å MS addition to Zr-catalyzed reaction: 0.5 mmol **1a** scale, 4 Å MS 15 mg).

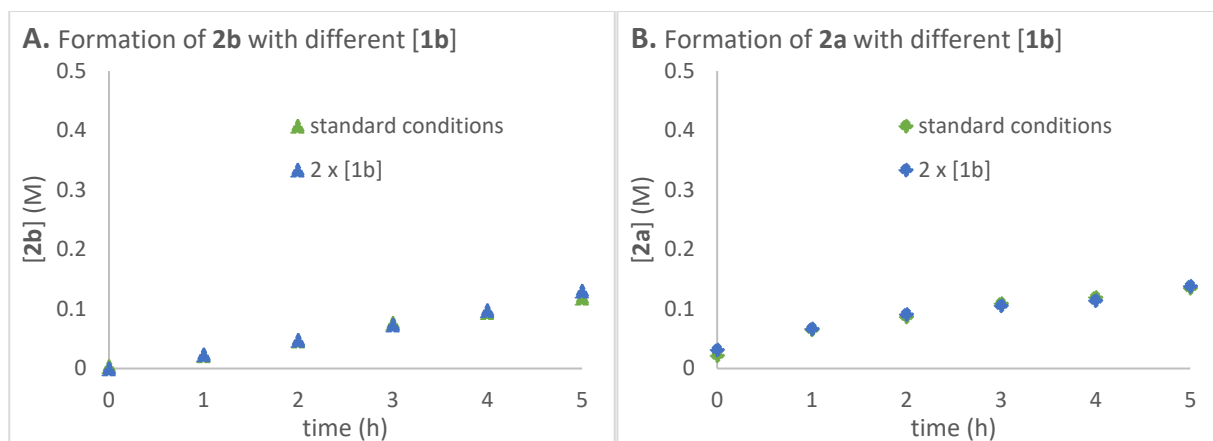

**Figure S12.** **A.** Formation of **2b** in presence of trifluoromethanesulfonic acid in catalytic amounts with different excess **1b**. **B.** Formation of **2a** in presence of trifluoromethanesulfonic acid in catalytic amounts. Standard conditions: 0.02 M  $\text{CF}_3\text{SO}_3\text{H}$ , 0.5 M **1a**, 1 M **1b**, 100 °C, BTF (0.5 mmol **1a** scale).

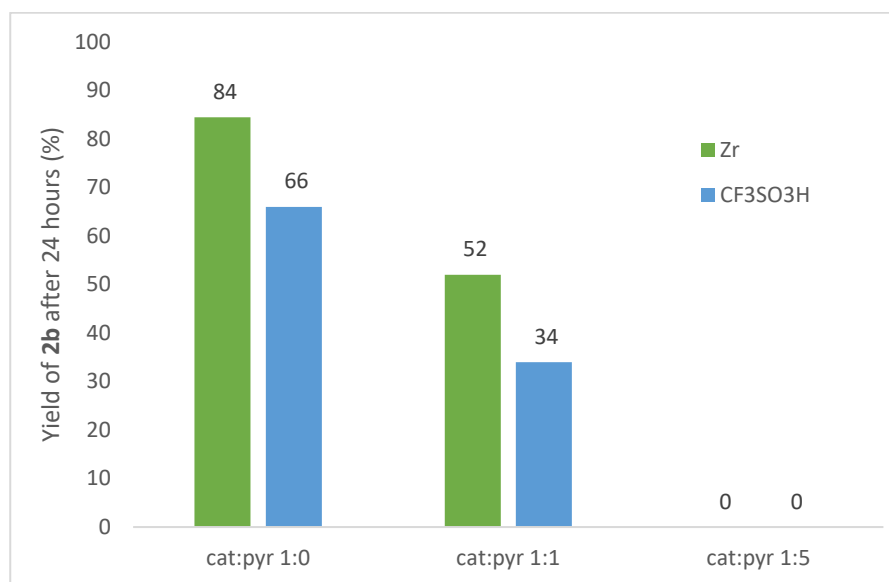

**Figure S13.** Reaction outcome after 24 hours in presence of either zirconocene triflate or trifluoromethylsulfonic (triflic) acid in catalytic amounts with varying concentrations of 2,6-di-*tert*-butyl-4-methylpyridine (pyr). Standard conditions (Zr): 0.02 M  $\text{Zr}(\text{Cp})_2(\text{CF}_3\text{SO}_3)_2 \cdot \text{THF}$ , 0.25 M **1a**, 1 M **1b**, 100 °C, BTF. The pyridine was added along with the reagents and present from time = 0 in the reaction mixture. Standard conditions ( $\text{CF}_3\text{SO}_3\text{H}$ ): 0.02 M  $\text{CF}_3\text{SO}_3\text{H}$ , 0.5 M **1a**, 1 M **1b**, 100 °C, BTF. The pyridine was added along with the reagents and present from time = 0 in the reaction mixture.

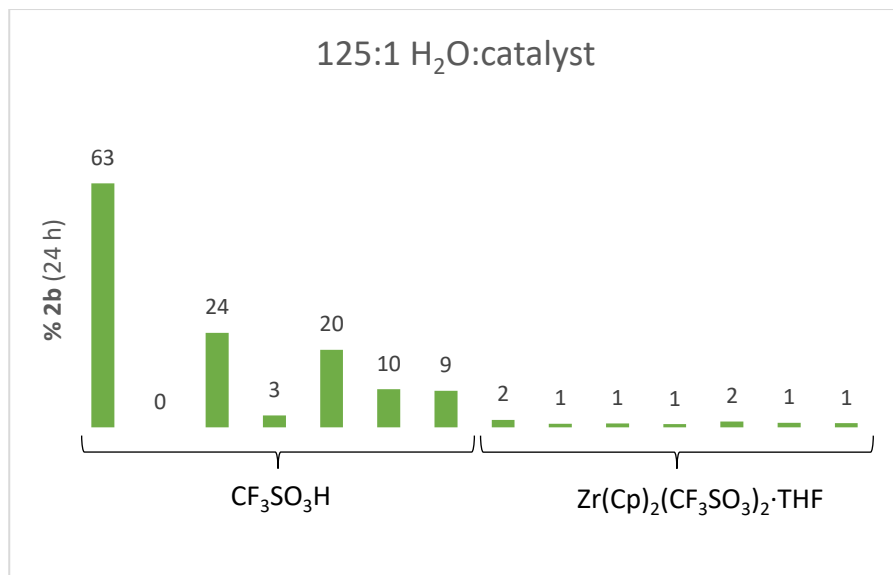

**Figure S14.** Reaction behavior in presence of 125:1 water:catalyst. Conditions: 0.02 M catalyst, 0.5 M **1a**, 1 M **1b**, 2.5 M H<sub>2</sub>O, 100 °C, BTF (1.5 mmol **1a** scale). The reaction was repeated seven times for each catalyst. Values are normalized to [**1a**]<sub>0</sub>.

The yield of **2b** in the 125:1 H<sub>2</sub>O:catalyst experiment repeatedly did not exceed 2% in the presence of the Zr catalyst, whereas triflic acid catalysis resulted in 10% median yield over seven runs (Figure S14). For the latter, a variation in the yield between 0 and 63% after 24 hours was observed where high yielding reactions correlated with observation of water droplets in the vial cap and/or leaking caps.

In a set of experiments 0.02 M  $\text{Zr}(\text{Cp})_2(\text{CF}_3\text{SO}_3)_2 \cdot \text{THF}$  was let to react with 1 eq. of  $\text{H}_2\text{O}$  in BTF at 100 °C for 0.5 h, then dried under reduced pressure and high vacuum. The dark solid residue was then used as catalyst in a standard etherification procedure without further manipulation (0.5 mmol **1a**, 1.0 mmol **1b** scale, Figure S15A). The same rate of ether formation corresponding to the use of Zr catalyst that was not pre-treated with 1 eq  $\text{H}_2\text{O}$  was observed in absence of molecular sieves (Figure S15B and S15C), and inhibition of catalysis was confirmed in presence of 4 Å molecular sieves (Figure S15D).

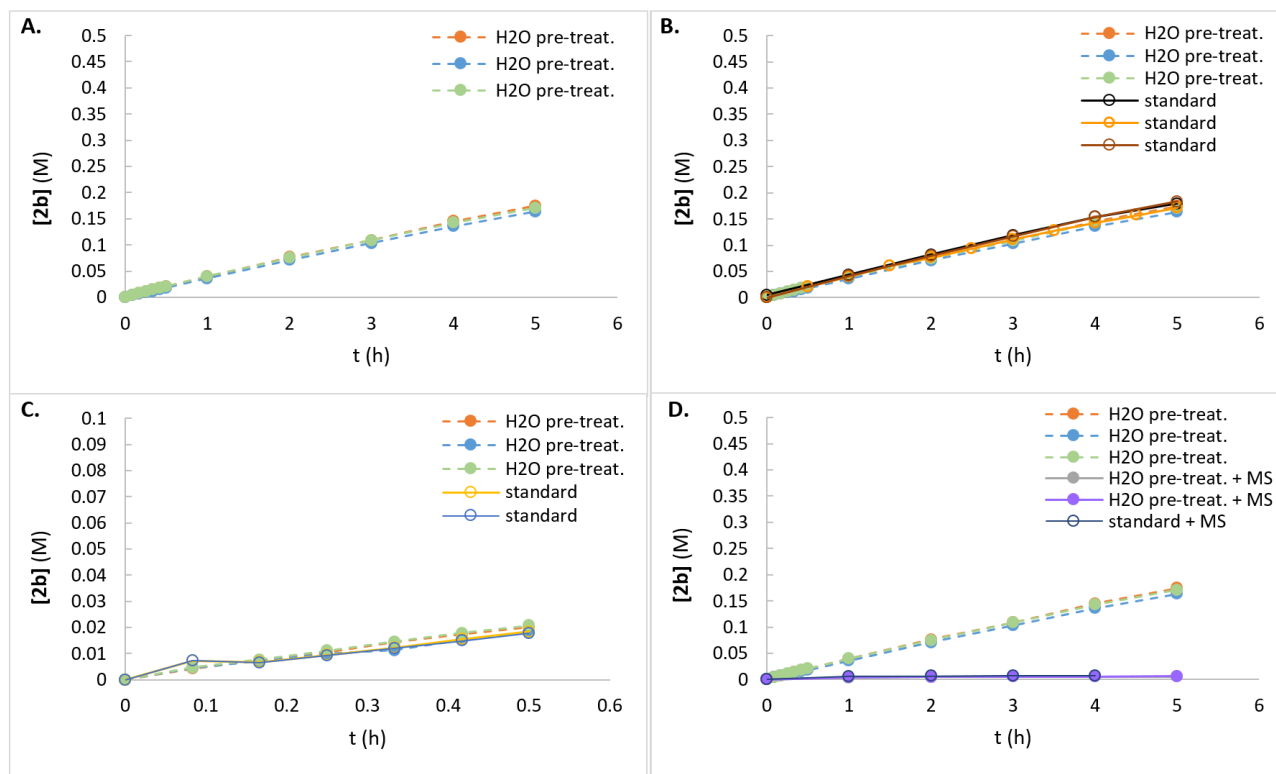

**Figure S15.** **A.** Formation of **2b** when  $\text{Zr}(\text{Cp})_2(\text{CF}_3\text{SO}_3)_2 \cdot \text{THF}$  is pre-treated with 1 eq  $\text{H}_2\text{O}$  **B.** Comparison with standard conditions (0-5 h monitoring) **C.** Comparison with standard conditions (0-0.5 h monitoring) **D.** Reaction behavior in presence of 4 Å MS (15 mg, 0.5 mmol **1a** scale). Conditions: 0.02 M catalyst, 0.5 M **1a**, 1 M **1b**, 100 °C, BTF (0.5 mmol **1a** scale). Values are normalized to  $[\mathbf{1a}]_0$ .

## 2.9. Substitution effects

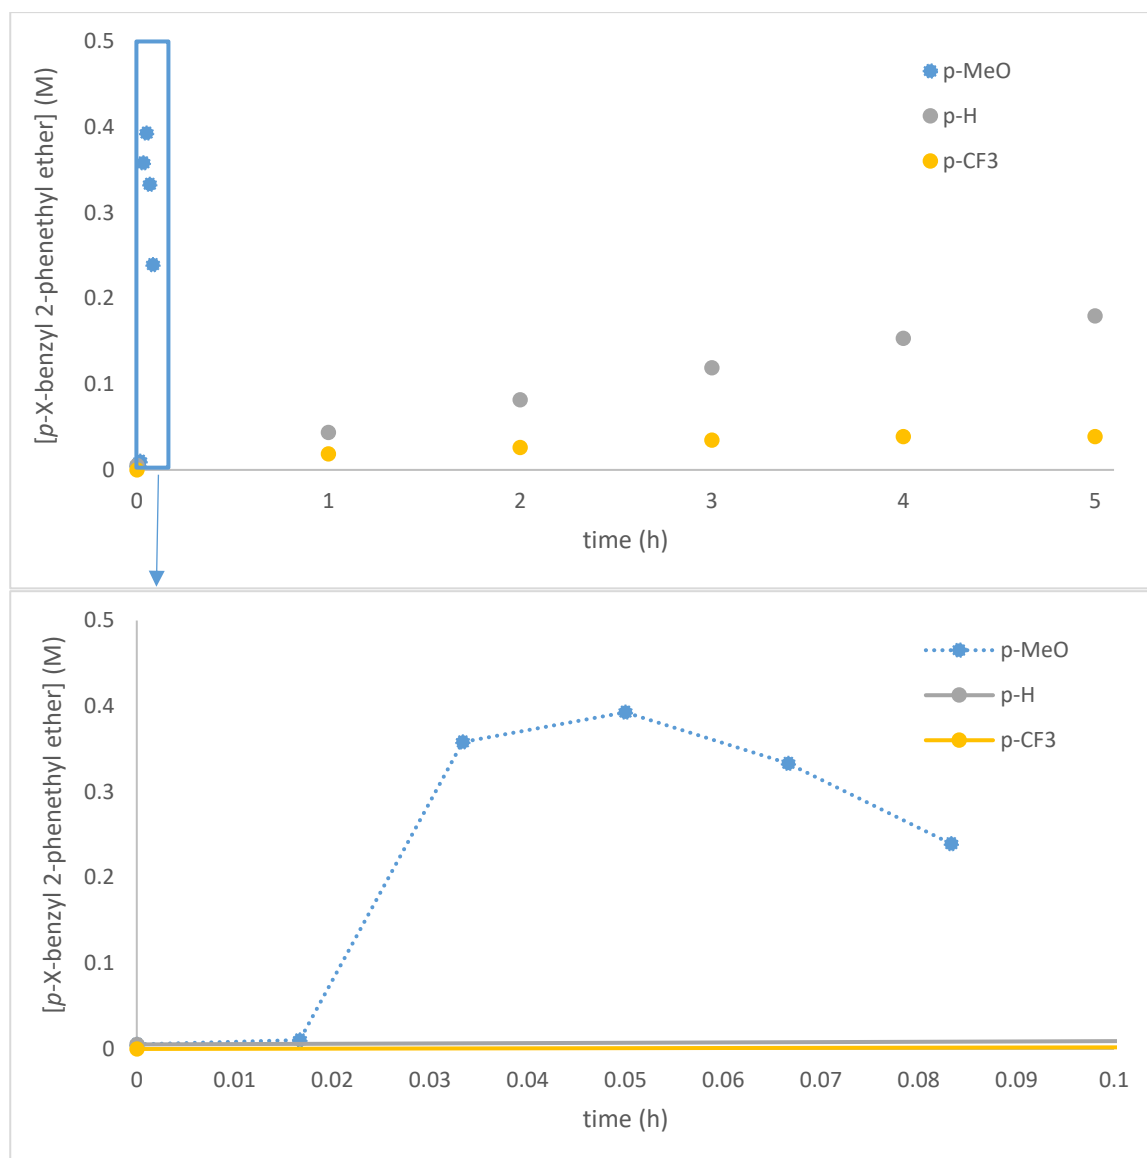

**Figure S16.** Rate comparison for the etherification of different *p*-substituted benzyl alcohols. Conditions: 0.02 M Zr(Cp)<sub>2</sub>(CF<sub>3</sub>SO<sub>3</sub>)<sub>2</sub>·THF, 0.5 M *p*-X-BnOH, 1 M **1b**, 100 °C, BTF (0.5 mmol *p*-X-BnOH scale). Values are normalized to [benzylic alcohol]<sub>0</sub>.

## 2.10. Transesterification

Formation of **2b** can take place via direct etherification of **1a** and **1b** or via transesterification by **2a** and **1b**. The rate of the latter occurs at a slower rate as shown in Figure S17.

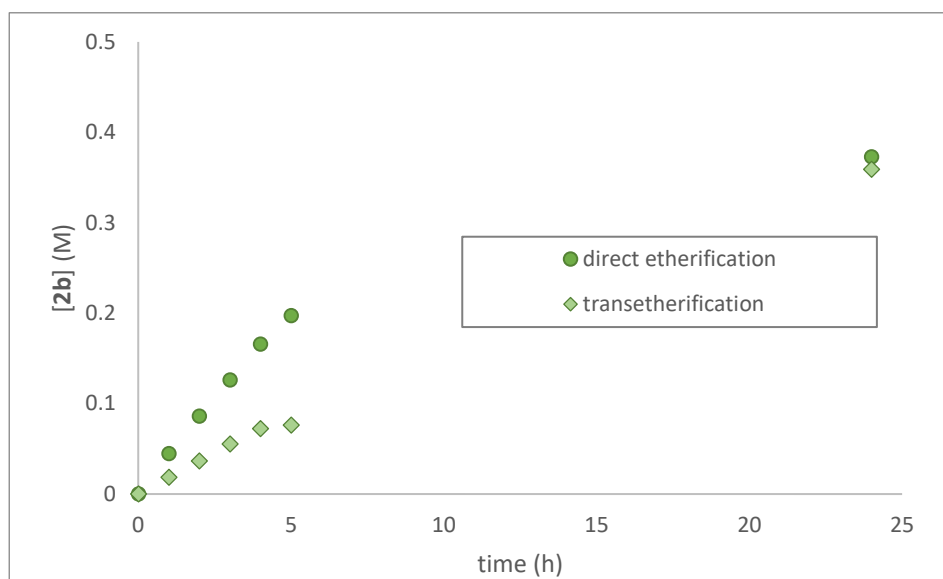

**Figure S17.** Rate comparison for direct etherification and transesterification Conditions: 0.02 M  $\text{Zr}(\text{Cp})_2(\text{CF}_3\text{SO}_3)_2 \cdot \text{THF}$ , 0.5 M **1a** or **2a**, 1 M **1b**, 100 °C, BTF (0.5 mmol scale).

A set of experiments with different concentrations of reactants and catalyst was carried out under transesterification conditions, indicating that the transformation has a positive rate dependence on  $[\text{Zr}]$  and **[2a]** and negative rate dependence on **[1b]** (Figure S18).

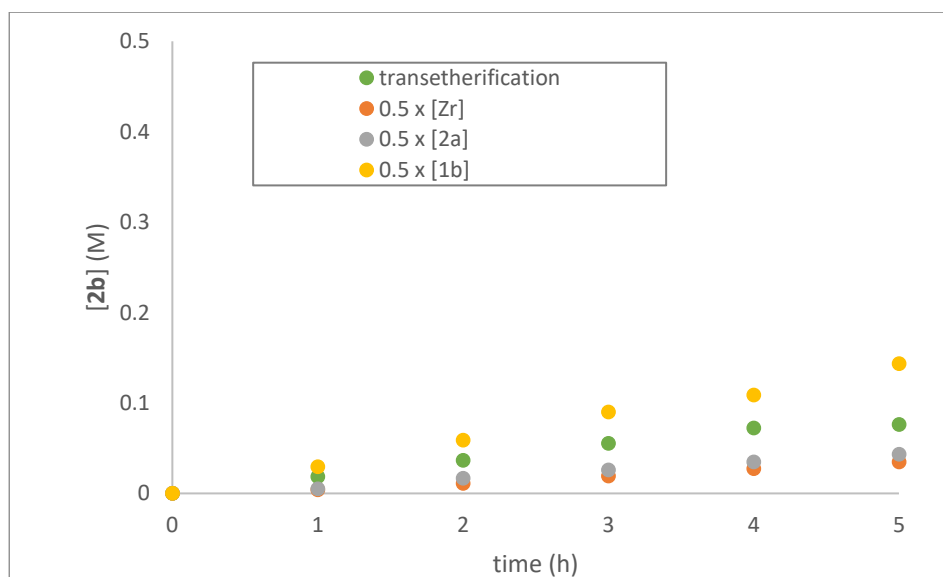

**Figure S18.** The effect on transesterification rate by concentration of reaction components. Standard transesterification conditions: 0.02 M  $\text{Zr}(\text{Cp})_2(\text{CF}_3\text{SO}_3)_2 \cdot \text{THF}$ , 0.5 M **2a**, 1 M **1b**, 100 °C, BTF (0.5 mmol scale).

The efficiency by which the transesterification process occurs under different set of synthetically relevant conditions can be seen in Figure S19-S21 where the concentration of **2a** is plotted against the concentration of **2b**. As evident in Figure S19, the profiles have two main regimes where the slope of the curves are different. In the first regime of both plots **2a** and **2b** are growing simultaneously. The second regime has a negative slope for the reaction with higher [Zr], indicating that the rate of transesterification is positively correlated with [Zr].

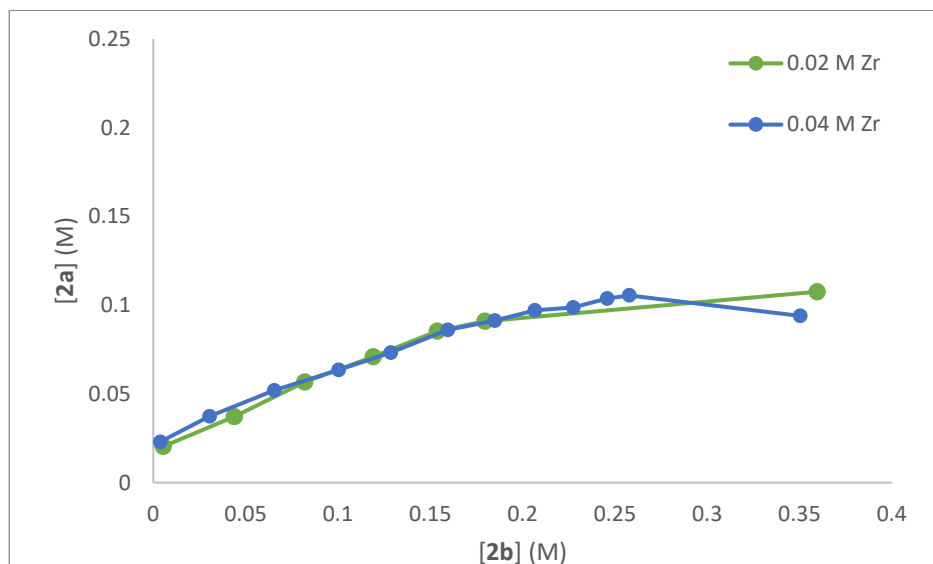

**Figure S19.** Transformation of **2a** into **2b** in reactions with different [Zr]. Conditions: 0.02 or 0.04 M  $\text{Zr}(\text{Cp})_2(\text{CF}_3\text{SO}_3)_2 \cdot \text{THF}$ , 0.5 **1a**, 1 M **1b**, 100 °C, BTF (0.5 mmol scale). Concentrations are normalized to  $[\mathbf{2a}]_0$ .

In Figure S20 the first regime shows that both **2a** and **2b** are growing simultaneously in both plots. In the second regime, the slope is negative for the reaction where higher  $[\mathbf{2a}]$  has formed ( $2 \times [\mathbf{1a}]$ ). This growth of **2b** at the expense of **2a** indicates that the rate of transesterification is positively correlated with  $[\mathbf{2a}]$ .

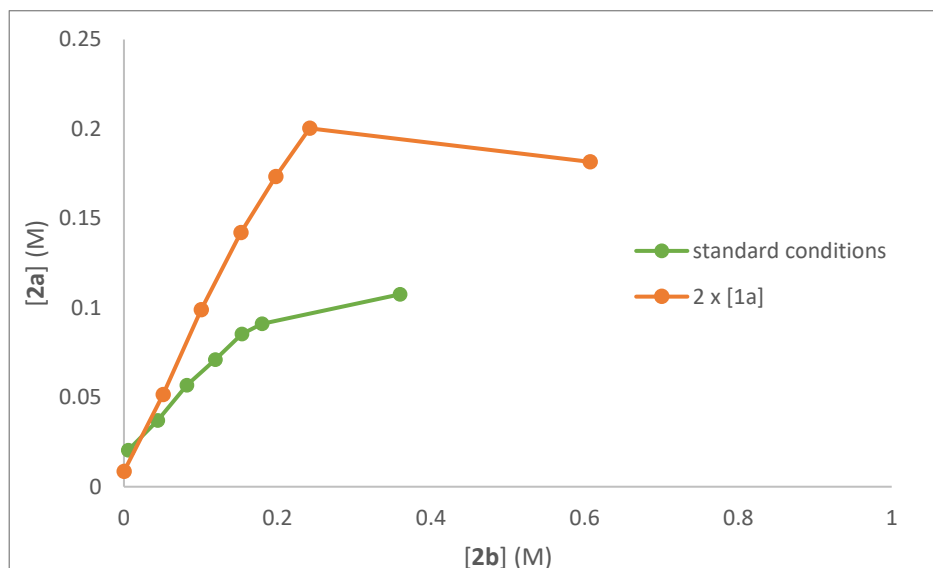

**Figure S20.** Transformation of **2a** into **2b** in reactions with different  $[\mathbf{1a}]$ . Conditions: 0.02 M  $\text{Zr}(\text{Cp})_2(\text{CF}_3\text{SO}_3)_2 \cdot \text{THF}$ , 0.5 or 1 M **1a**, 1 M **1b**, 100 °C, BTF (0.5 mmol scale). Concentrations are normalized to  $[\mathbf{2a}]_0$ .

Figure S21 shows the result of standard conditions and those of the reaction using  $2 \times [\mathbf{1b}]$ . In this case both the first and second regime has a positive slope, indicating that  $[\mathbf{2a}]$  and  $[\mathbf{2b}]$  are growing simultaneously. This behavior suggests that  $[\mathbf{1b}]$  is not a driving force for the transesterification process.

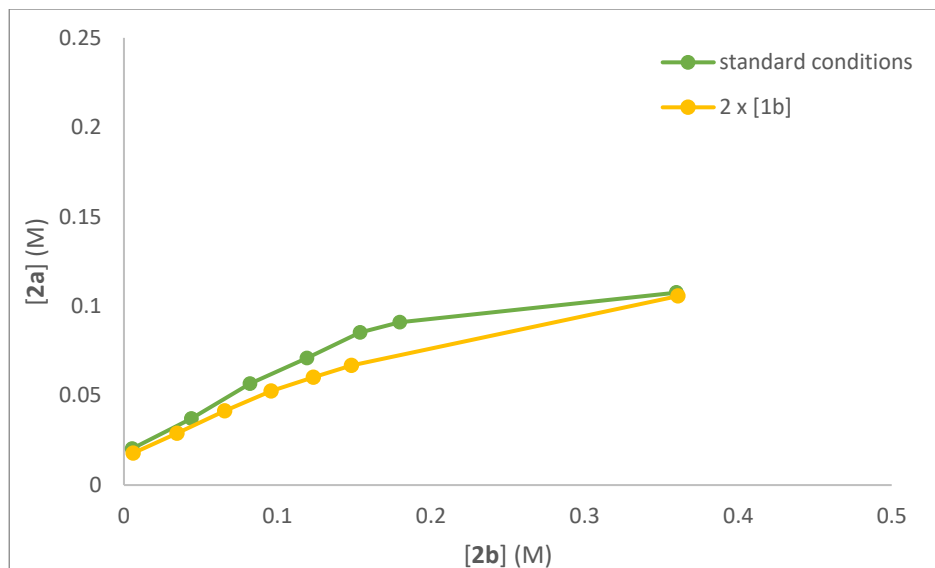

**Figure S21.** Transformation of **2a** into **2b** in reactions with different **[1b]**. Conditions: 0.02 M  $\text{Zr}(\text{Cp})_2(\text{CF}_3\text{SO}_3)_2 \cdot \text{THF}$ , 0.5 M **1a**, 1 or 2 M **1b**, 100 °C, BTF (0.5 mmol scale). Concentrations are normalized to  $[\mathbf{2a}]_0$ .

Figure S22 shows the time course data for the formation of **2b** for the reactions in Figures S19-21.

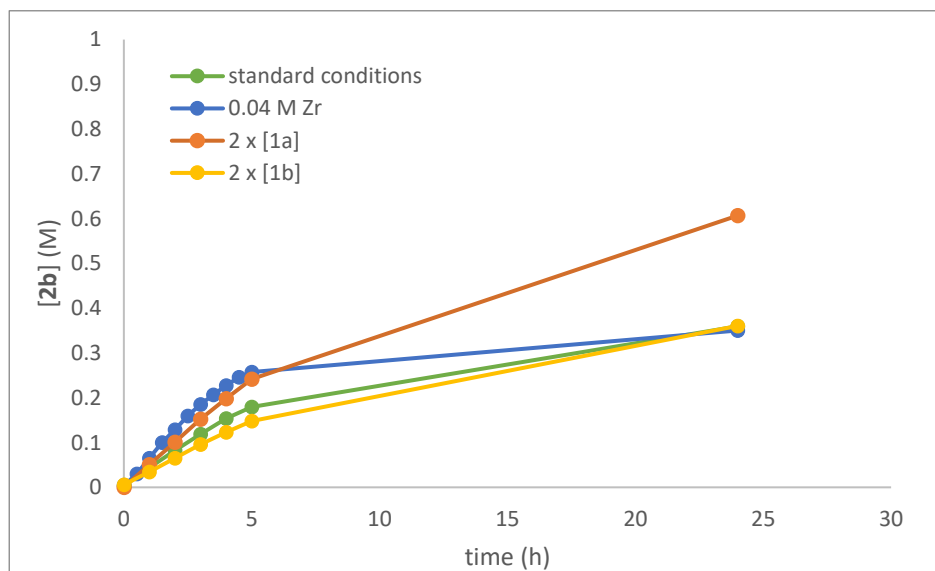

**Figure S22.** Formation of **2b** over time. Standard conditions: 0.02 M  $\text{Zr}(\text{Cp})_2(\text{CF}_3\text{SO}_3)_2 \cdot \text{THF}$ , 0.5 M **1a**, 1 M **1b**, 100 °C, BTF (0.5 mmol scale). Concentrations are normalized to  $[\mathbf{2a}]_0$ .

Figure S23 shows the time course data for the formation of **2a** for the reactions in Figures S19-21.

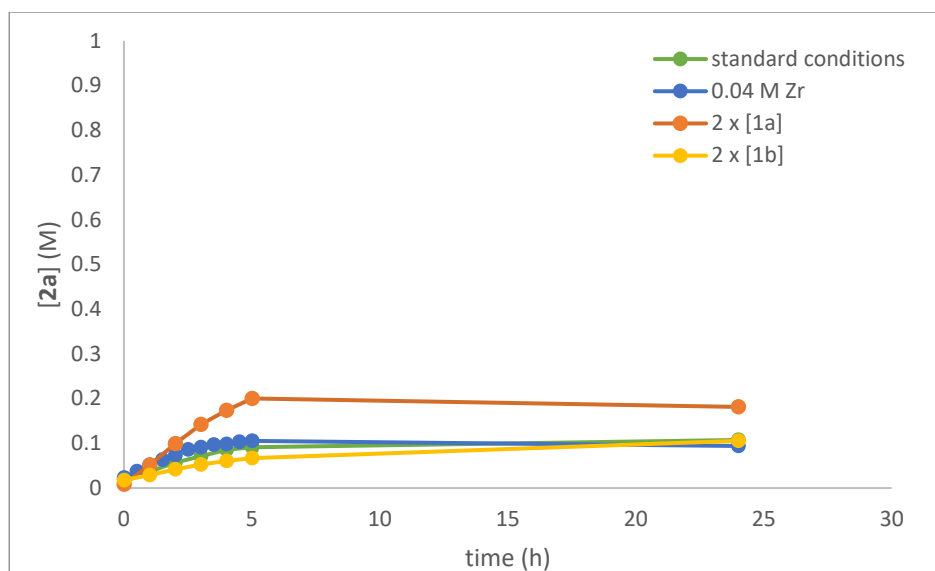

**Figure S23.** Formation of **2a** over time. Standard conditions: 0.02 M  $\text{Zr}(\text{Cp})_2(\text{CF}_3\text{SO}_3)_2 \cdot \text{THF}$ , 0.5 M **1a**, 1 M **1b**, 100 °C, BTF (0.5 mmol scale). Concentrations are normalized to  $[\mathbf{2a}]_0$ .

Figure S24 shows the time course data for the consumption of **1a** for the reactions in Figures S19-21.

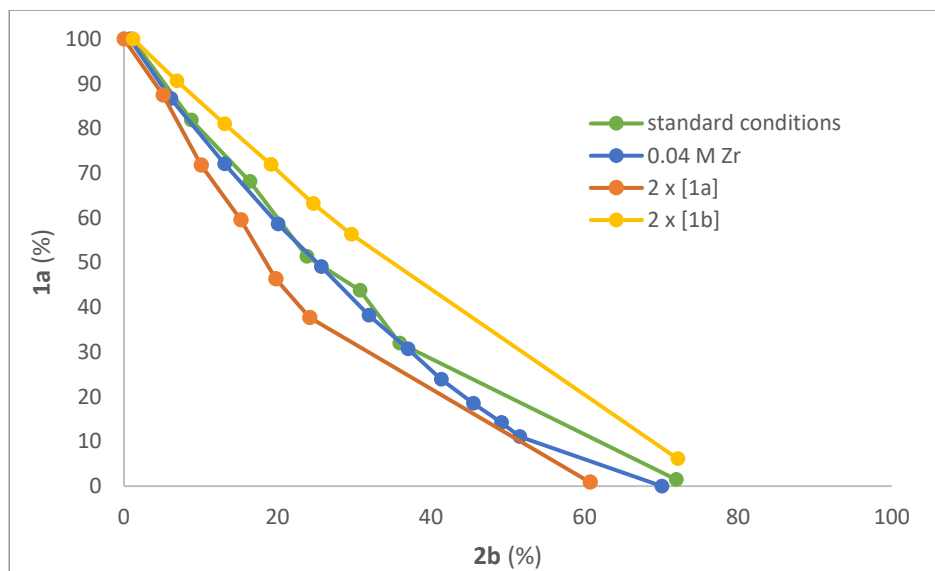

**Figure S24.** Conversion of **1a** into **2b**. Standard conditions: 0.02 M  $\text{Zr}(\text{Cp})_2(\text{CF}_3\text{SO}_3)_2 \cdot \text{THF}$ , 0.5 M **1a**, 1 M **1b**, 100 °C, BTF (0.5 mmol scale).

Figure S25 shows the incorporation of **1a** into **2b** for the reactions in Figures S19-21.

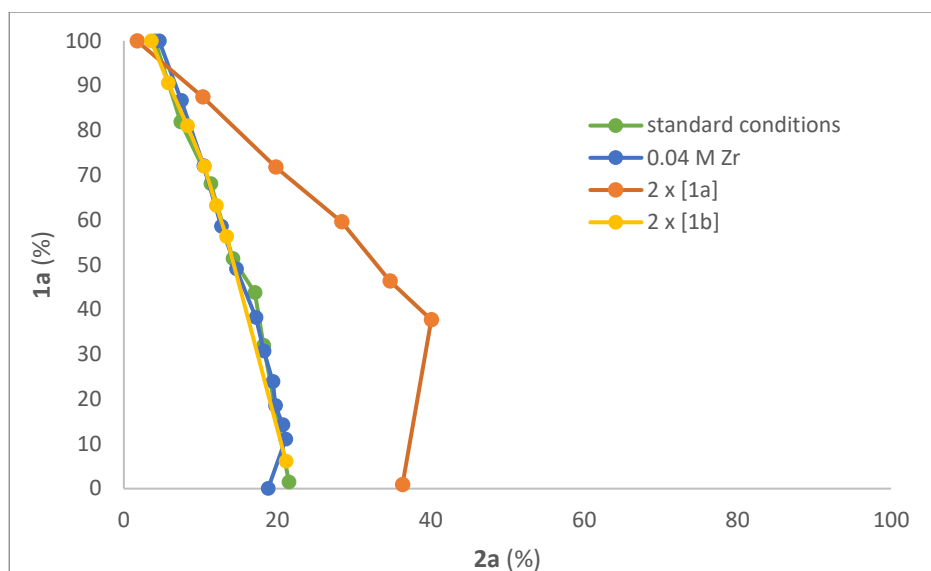

**Figure S25.** Conversion of **1a** into **2a**. Standard conditions: 0.02 M  $\text{Zr}(\text{Cp})_2(\text{CF}_3\text{SO}_3)_2 \cdot \text{THF}$ , 0.5 M **1a**, 1 M **1b**, 100 °C, BTF (0.5 mmol scale).

Figure S26 shows the two zirconium-catalyzed processes that lead to formation of product **2b**.

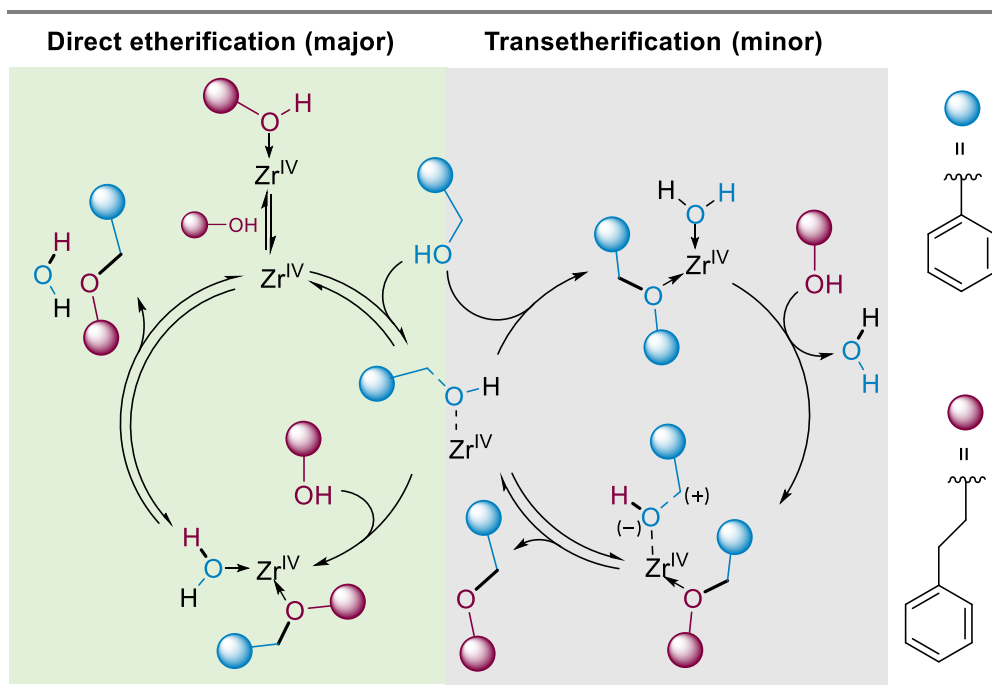

**Figure S26.** Major and minor catalytic pathways for **2b** formation

## 2.11. COPASI kinetic modeling

Global kinetic modeling was performed using COPASI as modeling software (<http://www.copasi.org>).<sup>3</sup> A model with the chemical steps shown in Figures S27 and S28 was constructed to fit the proposed mechanism. Since the experiments in Figure S11 and S14 indicated that water is not inhibiting the catalyst in the synthetically relevant concentration range, interaction between water and the catalyst was not explicitly included in the model. Similarly, transesterification was not integrated in the model as the rate of this process is considerably lower compared to direct etherification and hence assumed to contribute only marginally to formation of **2b** during the first hours of the reaction (Section 2.10).

| # | Name       | Reaction                                                          | Rate Law                   |
|---|------------|-------------------------------------------------------------------|----------------------------|
| 1 | Reaction 1 | $\text{Zr} + 1a = \text{Act}$                                     | Mass action (reversible)   |
| 2 | Reaction 2 | $1b + \text{Zr} = \text{Off}$                                     | Mass action (reversible)   |
| 3 | Reaction 3 | $\text{Act} + 1b \rightarrow 2b + \text{Zr} + \text{H}_2\text{O}$ | Mass action (irreversible) |
| 4 | Reaction 4 | $\text{Act} + 1a \rightarrow 2a + \text{Zr} + \text{H}_2\text{O}$ | Mass action (irreversible) |

**Figure S27.** Kinetic model built in COPASI software

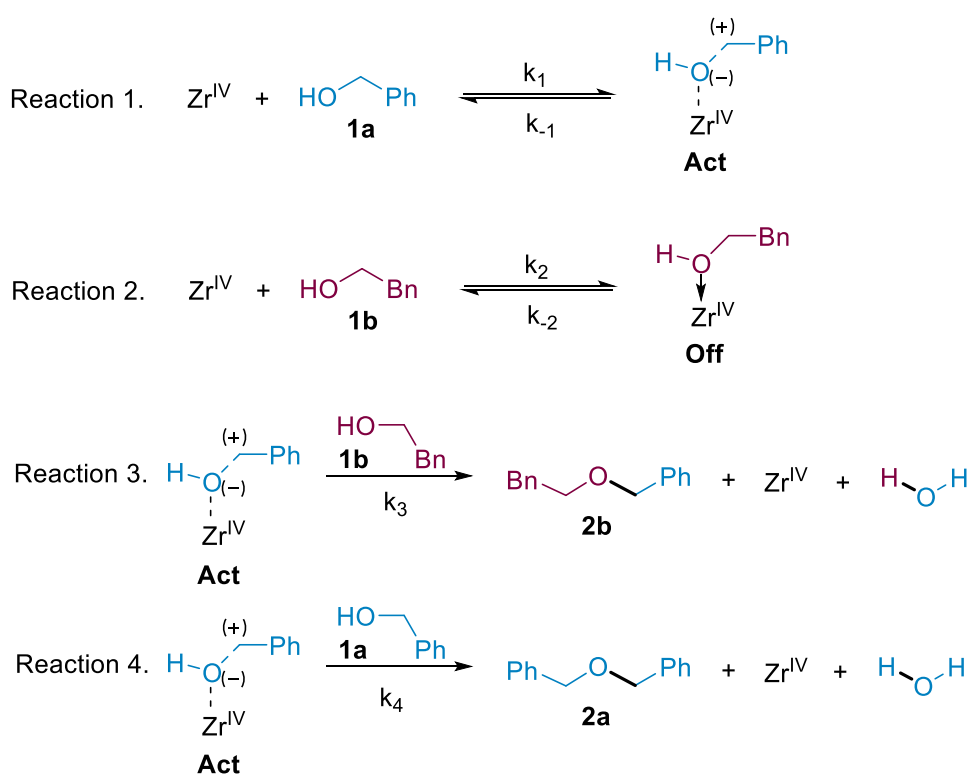

**Figure S28.** Schematic diagram of the reactions in the COPASI model

The kinetic model was optimized using the function Parameter Estimation with Hooke & Jeeves method and resulted in the kinetic constants shown in Table S1. As the model is underdetermined, these constants are not necessarily representing the true values for each individual step. However, as the simulated data generated from these constants fit well with the experimental data the model provides support for the

proposed catalytic cycle. Fits of the model to the experimental data used to optimize it are shown in Figure S29-S35 for 0-5 hours.

**Table S1.** Kinetic constants obtained via COPASI modeling

| <i>Kinetic Constant</i> | <i>Value</i> | <i>Std. Deviation</i> |
|-------------------------|--------------|-----------------------|
| $k_1$                   | 8.05364      | 0.404429              |
| $k_{-1}$                | 1.27728e-8   | 5.75836e-6            |
| $k_2$                   | 38.3334      | 543.565               |
| $k_{-2}$                | 266.206      | 3812.68               |
| $k_3$                   | 1259.68      | 13555.3               |
| $k_4$                   | 447.308      | 16084                 |

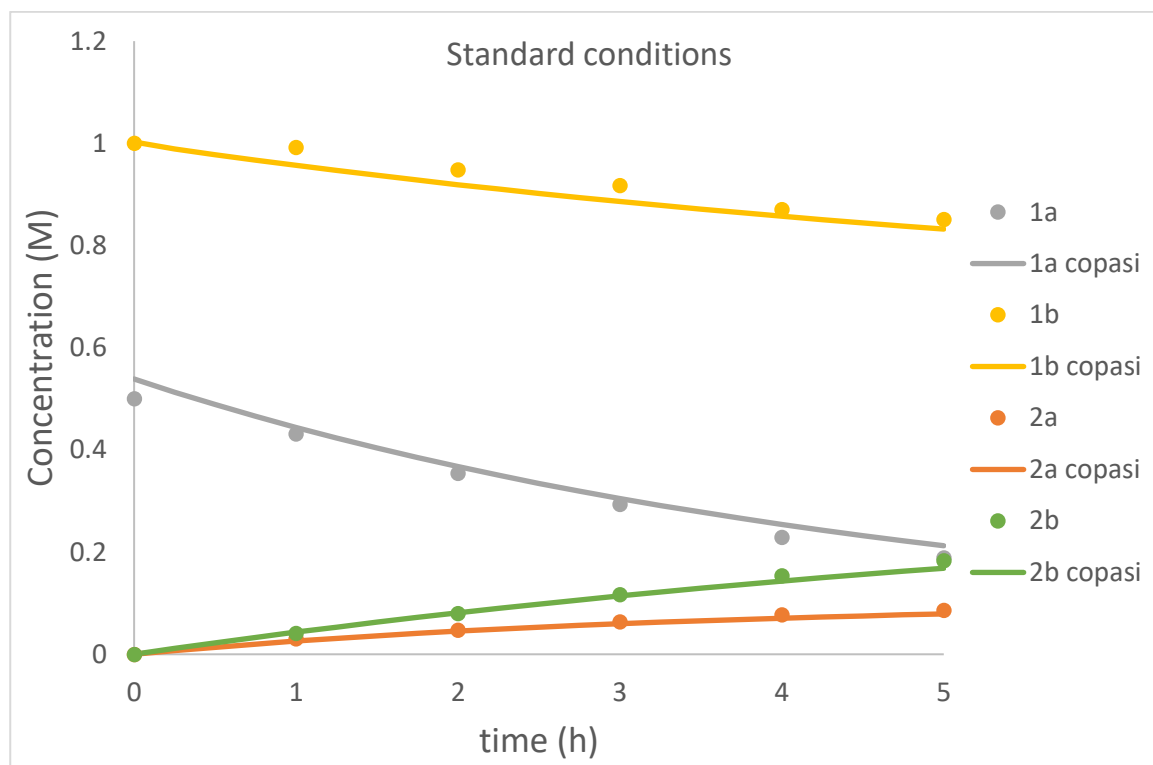

**Figure S29.** Model fit to standard conditions

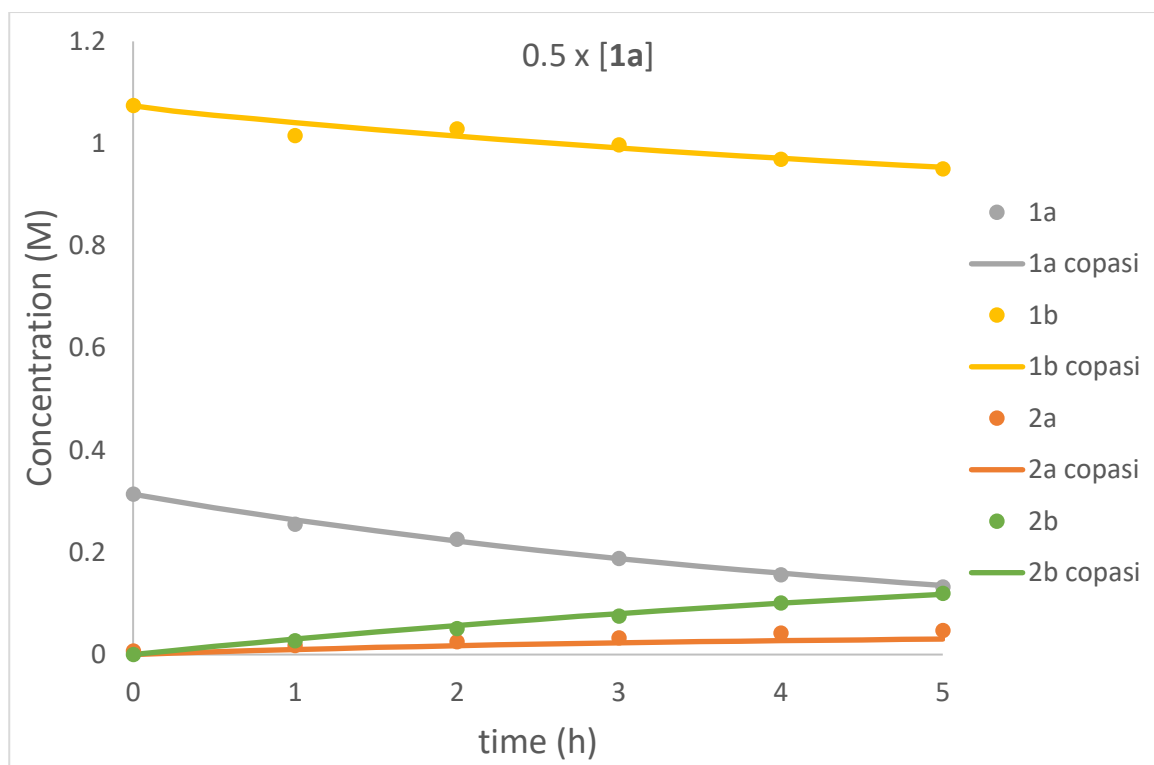

**Figure S30.** Model fit to 0.5 x [1a] conditions

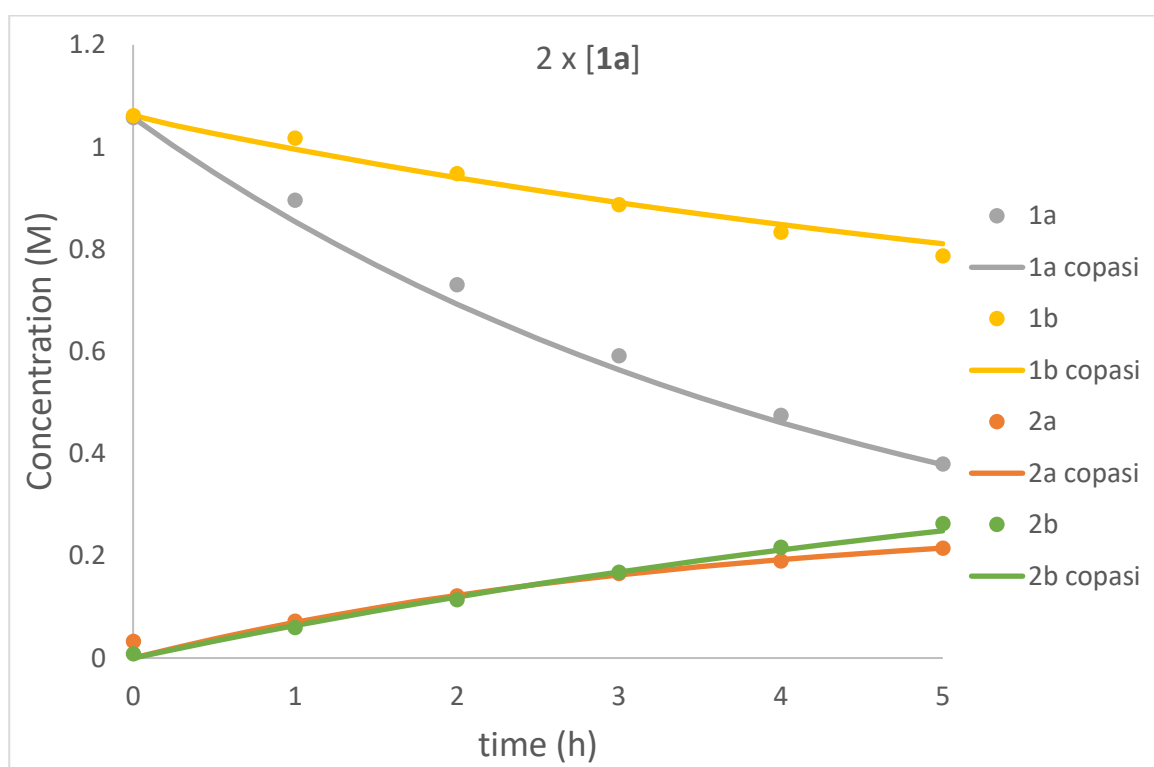

**Figure S31.** Model fit to 2 x [1a] conditions

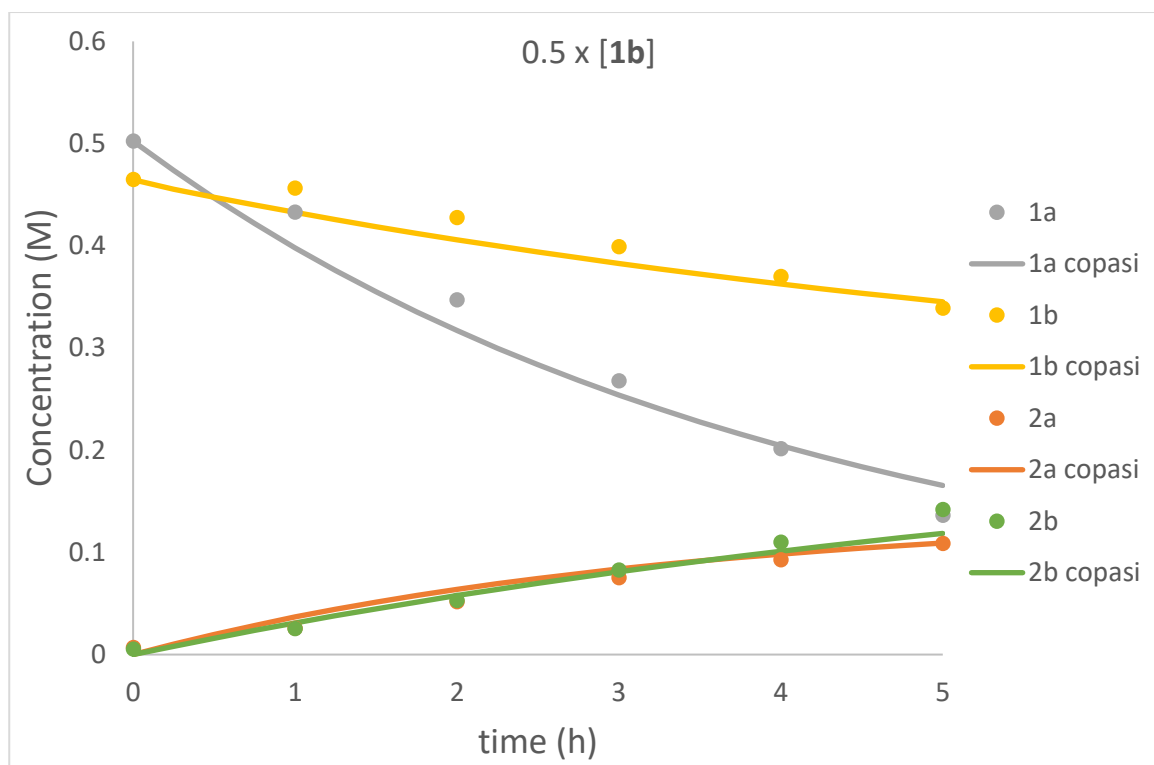

**Figure S32.** Model fit to 0.5 x [1b] conditions

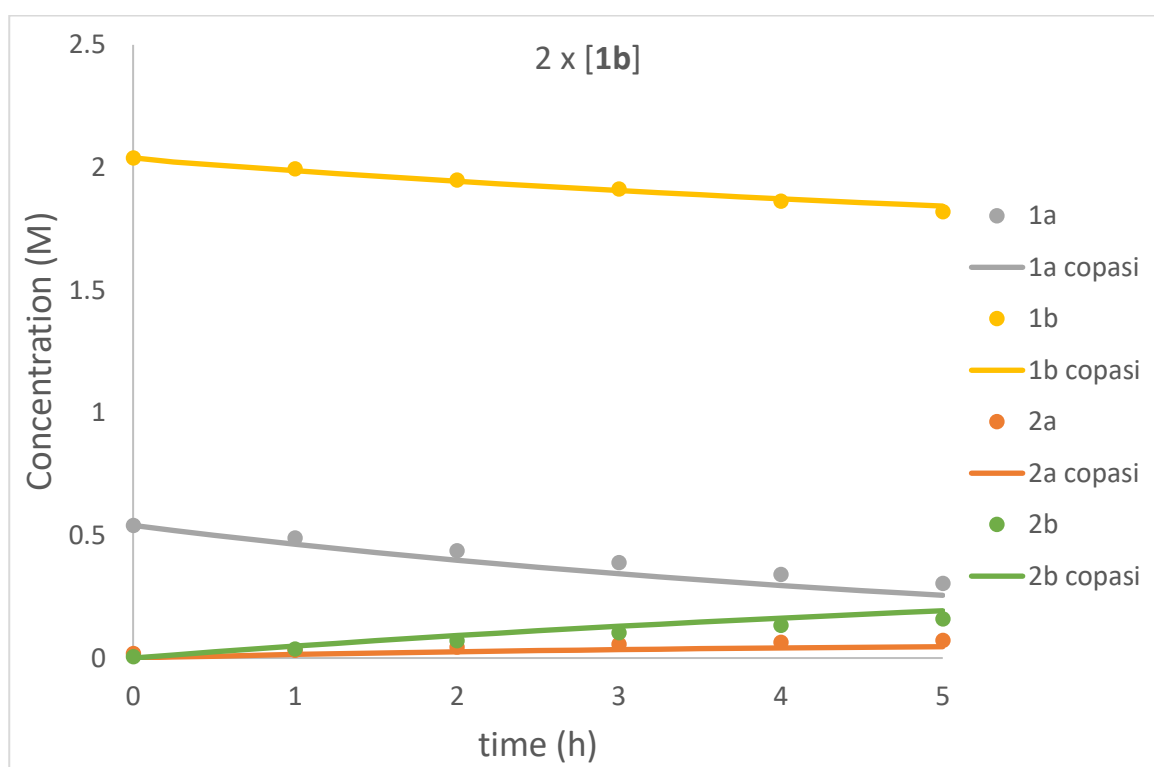

**Figure S33.** Model fit to 2 x [1b] conditions

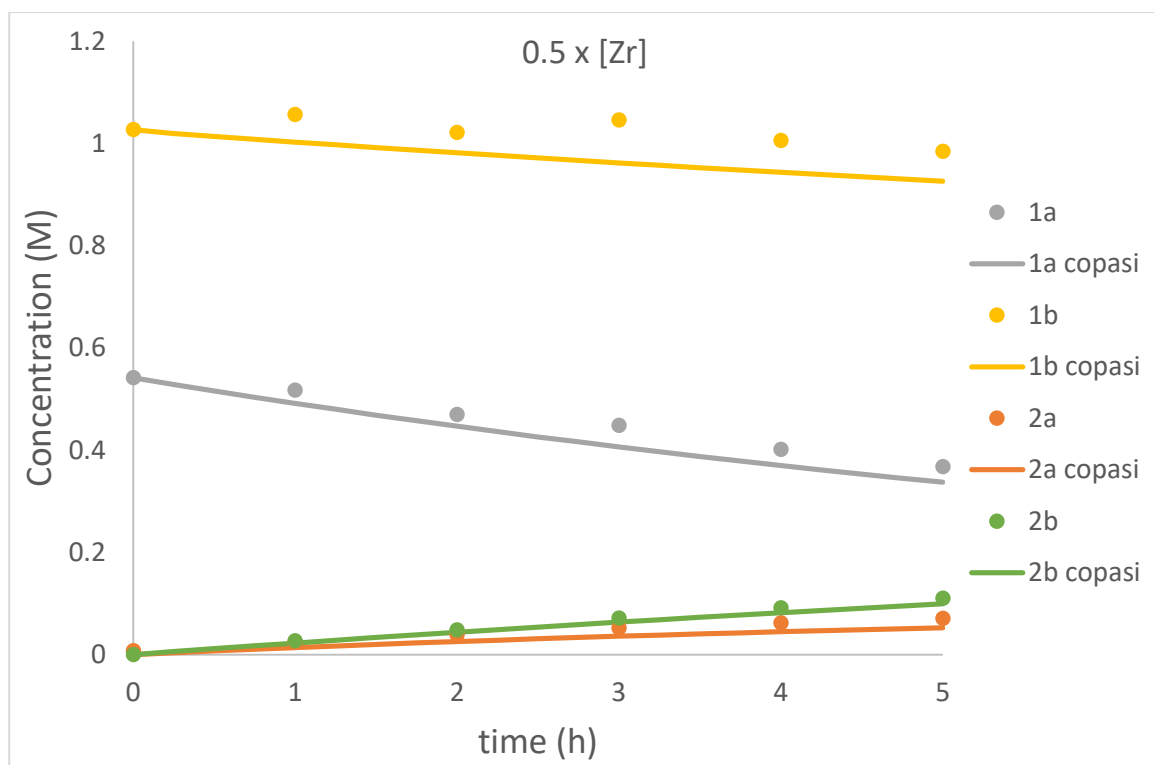

**Figure S34.** Model fit to 0.5 x [Zr] conditions

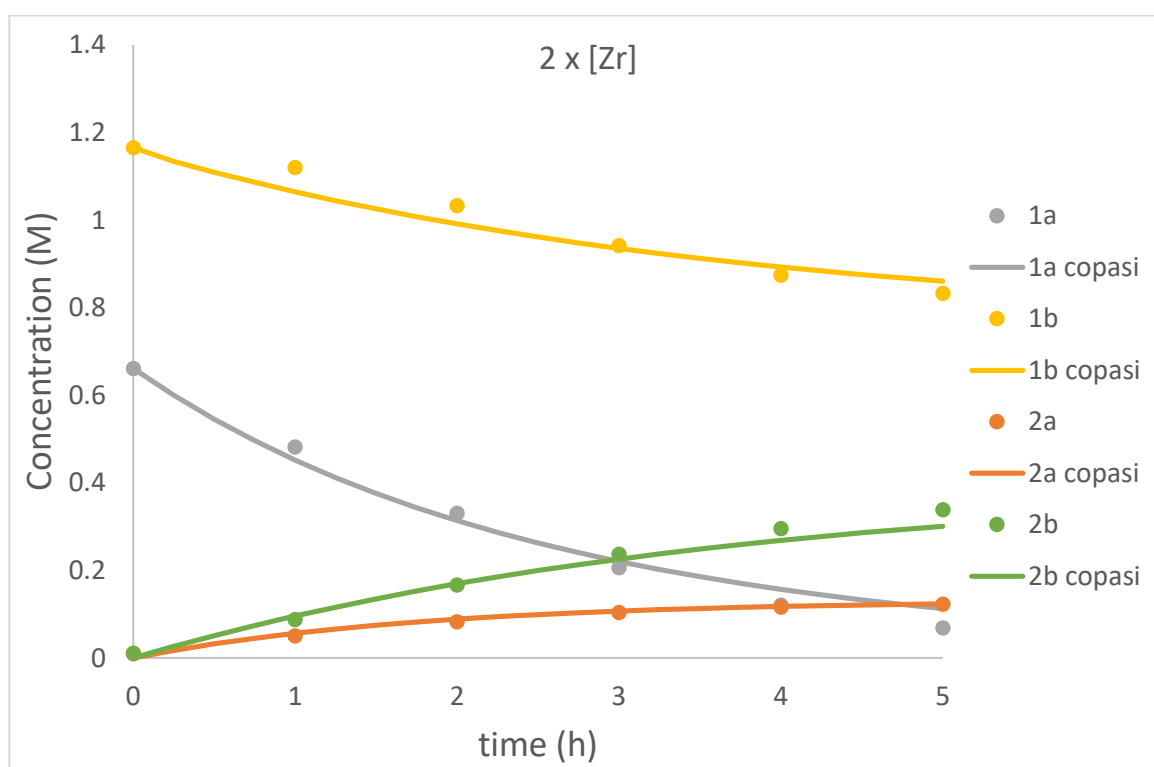

**Figure S35.** Model fit to 2 x [Zr] conditions

### 3. NMR study of catalyst

To a standard NMR tube were added  $^{13}\text{C}(1)$ -benzyl alcohol (0.25 mmol, 26  $\mu\text{L}$ ) and 0.5 mL toluene- $\text{d}_8$ , and a  $^{13}\text{C}$ -NMR spectrum was recorded at 104  $^\circ\text{C}$  (Figure S36, S37 top and S38C). Another tube was prepared in the same manner with the addition of  $\text{Zr}(\text{Cp})_2(\text{CF}_3\text{SO}_3)_2\cdot\text{THF}$  (0.01 mmol, 5.9 mg), and  $^{13}\text{C}$ -NMR spectra were recorded at 104  $^\circ\text{C}$  after 1 min (Figure S37, bottom) and after 10 min (Figure S38D). A sample of dibenzyl ether **2a** in 0.5 mL toluene- $\text{d}_8$  was also prepared and a  $^{13}\text{C}$ -NMR spectrum recorded at 104  $^\circ\text{C}$  for comparison (Figure S38B). Signals appearing around 40 ppm were found to correspond to *ortho* and *para*-benzylated toluene. The reference compounds were prepared by stirring benzyl alcohol (0.25 mmol, 26  $\mu\text{L}$ ) and  $\text{Zr}(\text{Cp})_2(\text{CF}_3\text{SO}_3)_2\cdot\text{THF}$  (0.01 mmol, 5.9 mg) in 0.5 mL toluene at 100  $^\circ\text{C}$  for 22 h. The solvent was removed by rotary evaporation and the resulting mixture filtered with pentane through a short plug of silica, affording a mixture of the benzylated toluene isomers as a colorless oil (*ca.* 25 mg).  $^1\text{H}$ -NMR and  $^{13}\text{C}$ -NMR spectra of this mixture were recorded in toluene- $\text{d}_8$  at 25  $^\circ\text{C}$  (Figure S38A). All the  $^{13}\text{C}$ -NMR spectra for this study were recorded at 125 MHz on a Bruker Avance 500 MHz spectrometer.

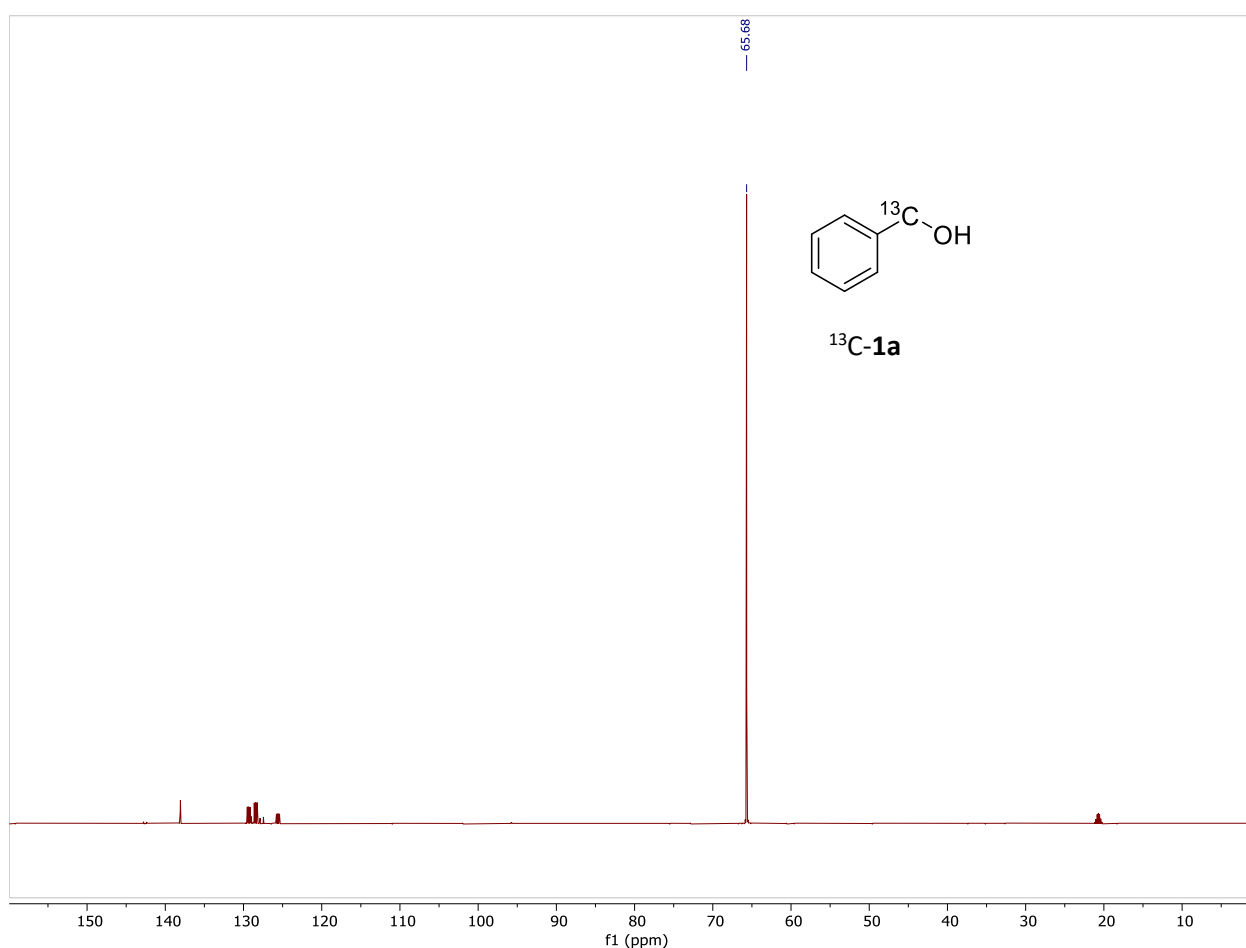

**Figure S36.**  $^{13}\text{C}$ -NMR of  $^{13}\text{C}(1)$ -benzyl alcohol in the absence of zirconocene triflate. Conditions: 0.5 M  $^{13}\text{C}(1)$ -**1b**, 104  $^\circ\text{C}$ , toluene- $\text{d}_8$ .

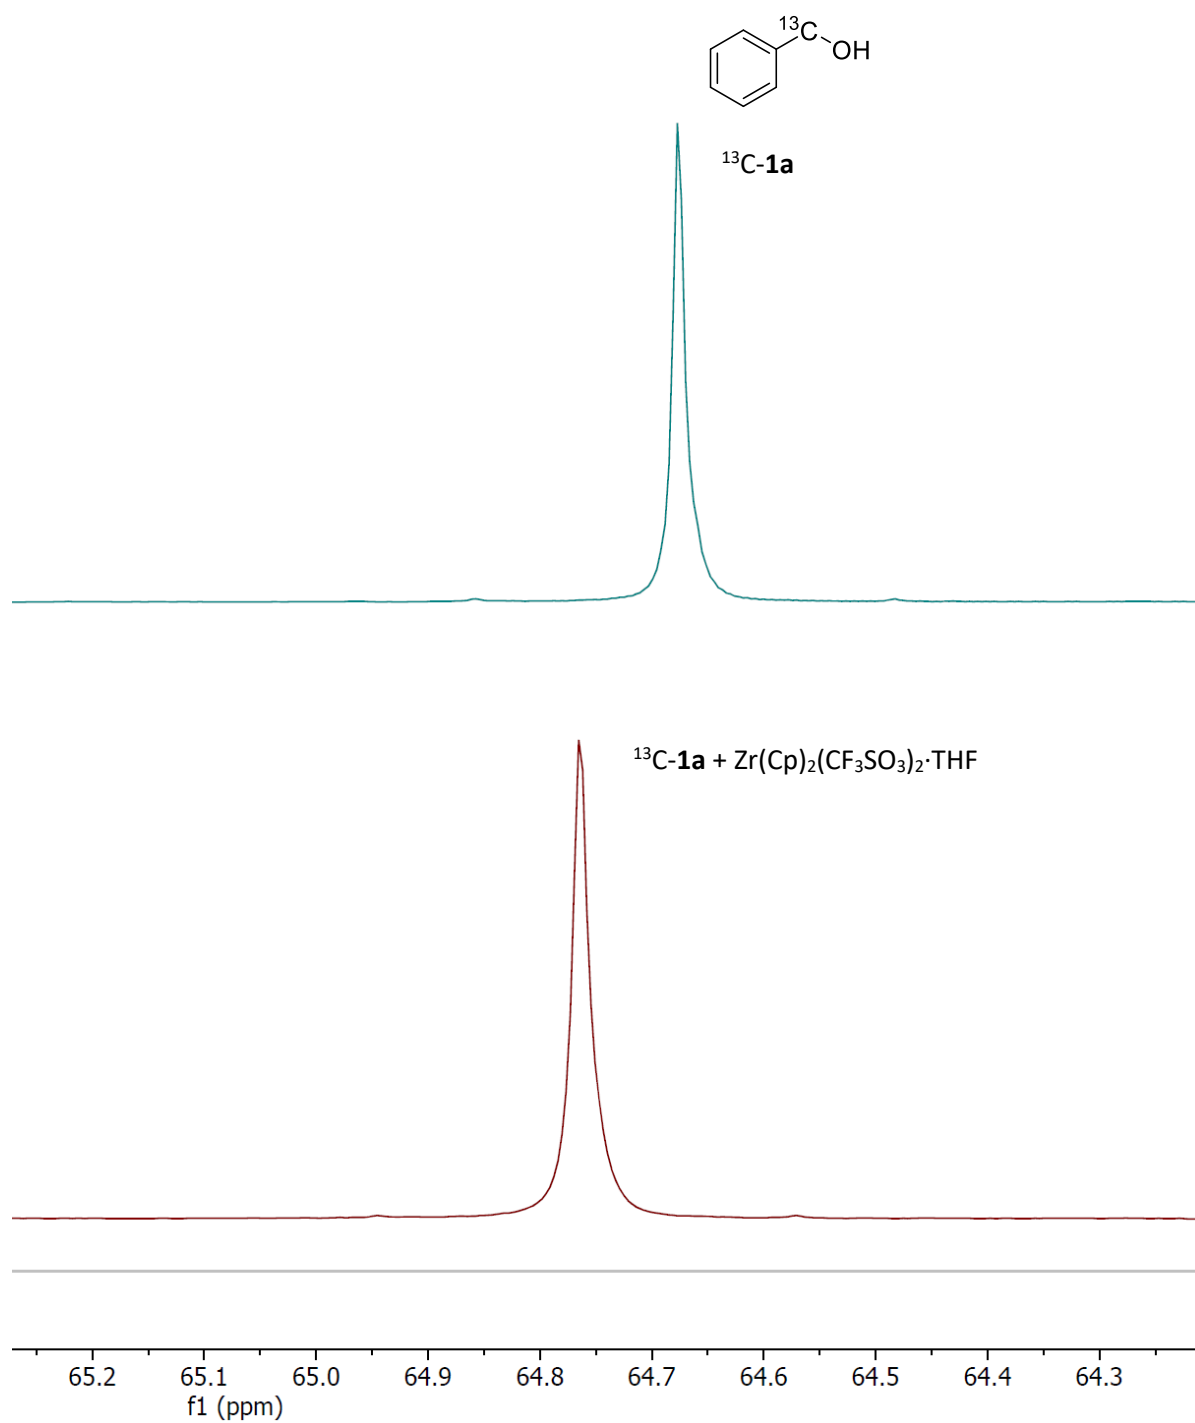

**Figure S37.**  $^{13}\text{C}$ -NMR of  $^{13}\text{C}(1)$ -benzyl alcohol in the absence (top) and presence (bottom) of zirconocene triflate (1 minute). Conditions: 0 or 0.02 M  $\text{Zr}(\text{Cp})_2(\text{CF}_3\text{SO}_3)_2 \cdot \text{THF}$ , 0.5 M  $^{13}\text{C}(1)$ -**1b**, 104 °C, toluene- $\text{d}_8$ .

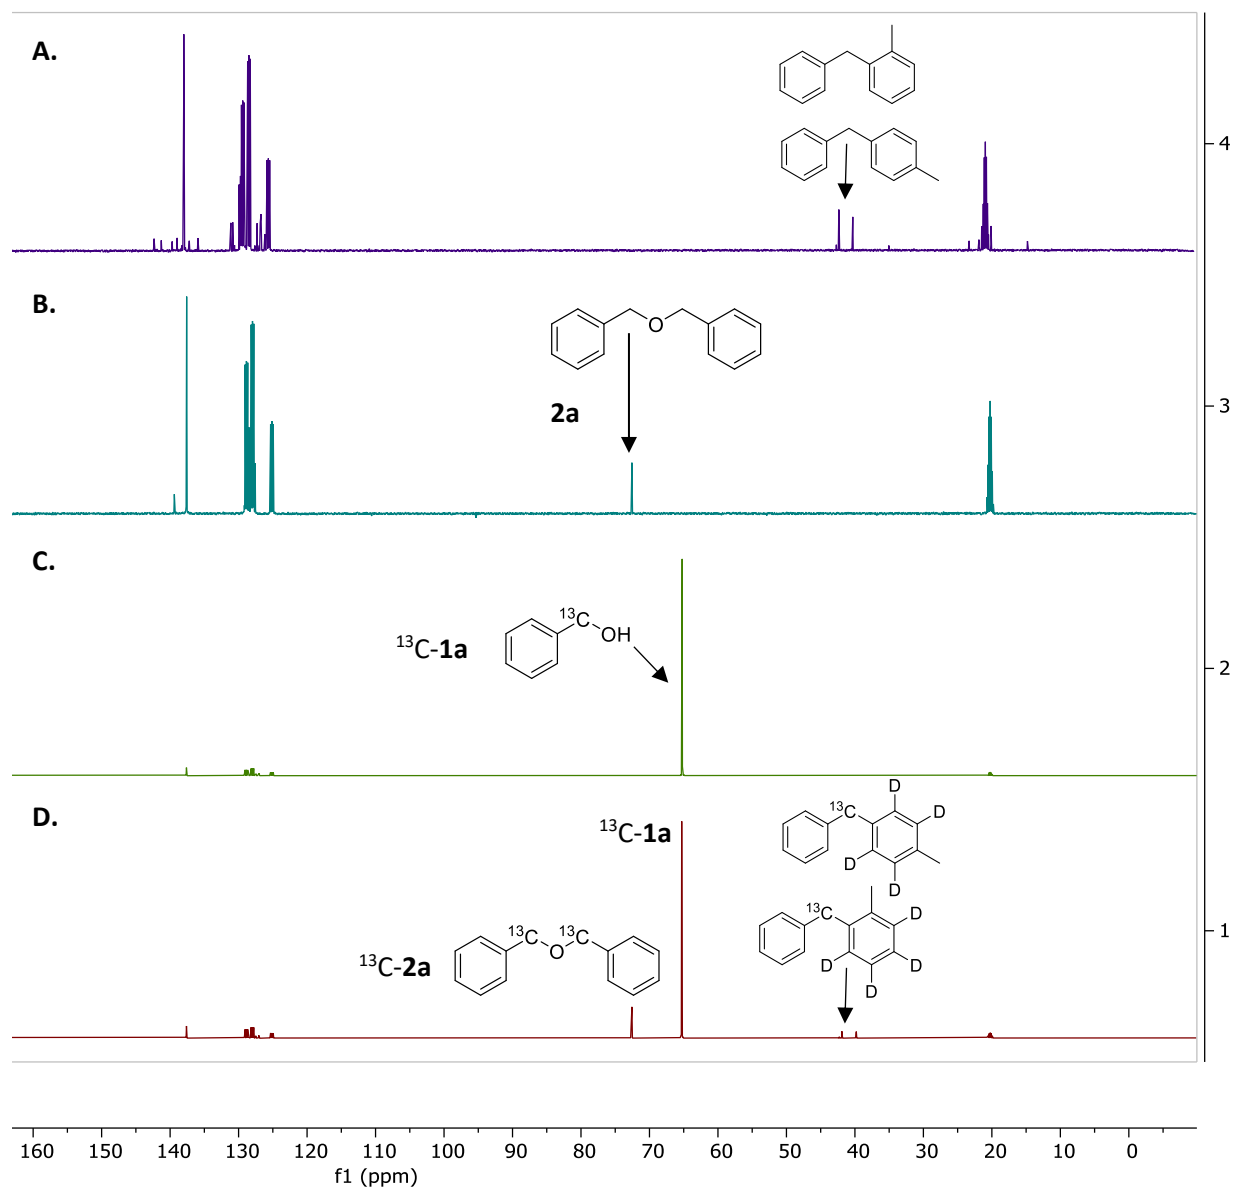

**Figure S38.**  $^{13}\text{C}$ -NMR spectra of *in situ* formed products from  $^{13}\text{C}$ (1)-**1a** and reference spectra. **A.** Mixture of *o*- and *p*-benzyltoluene in toluene- $d_8$ . **B.** Dibenzyl ether in toluene- $d_8$  at 104 °C. **C.**  $^{13}\text{C}$ (1)-**1a** at 104 °C in toluene- $d_8$ . **D.** Compound distribution in a mixture of  $^{13}\text{C}$ (1)-**1a** and zirconocene triflate after 10 minutes in toluene- $d_8$  (Conditions: 0.02 M  $\text{Zr}(\text{Cp})_2(\text{CF}_3\text{SO}_3)_2 \cdot \text{THF}$ , 0.5 M  $^{13}\text{C}$ (1)-**1b**, 104 °C, toluene- $d_8$ ).

## 4. General procedures

Reactions were carried out in 4 mL screw neck glass vials with screw caps with PTFE/rubber septa under ambient atmosphere unless otherwise noted. Reaction mixtures were furnished with stir bars and agitated at *ca* 800 rpm. Analysis for kinetics was carried out by removing aliquots of 20  $\mu$ L starting from 0-point (at the time of inserting the reaction vessel in an oil bath at the indicated temperature) and every hour after that unless otherwise noted. The aliquots were then analyzed by HPLC, and integrated against an internal standard (4,4'-di-*tert*-butylbiphenyl, DTBB). NMR yields were determined by quantitative  $^1\text{H}$ -NMR analysis in  $\text{CDCl}_3$  using 1,3,5-trimethoxybenzene as internal standard (added to the crude reaction mixture after evaporation of the solvent), and recording the spectra with D1 = 5 s or 10 s.

### 4.1. General etherification procedure for kinetic analysis (A)

$\text{Zr}(\text{Cp})_2(\text{CF}_3\text{SO}_3)_2 \cdot \text{THF}$  (0.02 mmol, 11.8 mg), benzyl alcohol (0.5 mmol, 52  $\mu$ L), 2-phenylethanol (1.0 mmol, 120  $\mu$ L), internal standard 4,4'-di-*tert*-butylbiphenyl (0.01 mmol, 0.25 mL of a 0.04 M stock solution in benzotrifluoride) and benzotrifluoride (up to 1 mL of total reaction volume) were added into the reaction vessel under air atmosphere. The screw cap was tightened and the vial immersed in an oil bath at 100  $^\circ\text{C}$ . At indicated times, 20  $\mu$ L reaction mixture was removed with a microliter syringe and mixed with 0.5 mL of 10% v/v aqueous acetonitrile (HPLC gradient grade), filtered in a filter vial (polypropylene housing, PTFE membrane) and subjected to HPLC analysis.

### 4.2. General substitution procedure for product isolation (B)

$\text{Zr}(\text{Cp})_2(\text{CF}_3\text{SO}_3)_2 \cdot \text{THF}$  (0.02 mmol, 11.8 mg), alcohol (0.25 mmol), nucleophile (1.0 mmol) and benzotrifluoride (up to 1 mL of total reaction volume) were added into the reaction vessel under air atmosphere. The screw cap was tightened and the vial immersed in an oil bath at the indicated temperature. After 24 h (unless otherwise stated) the reaction mixture was brought to room temperature and purified by column chromatography on silica gel using mixtures of EtOAc or  $\text{Et}_2\text{O}$  in petroleum ether or EtOAc in pentane as eluent (see individual compounds for eluent composition).

### 4.3. General substitution procedure for product isolation with sequential addition of alcohol (C)

$\text{Zr}(\text{Cp})_2(\text{CF}_3\text{SO}_3)_2 \cdot \text{THF}$  (0.02 mmol, 11.8 mg), nucleophile (1.0 mmol) and benzotrifluoride (up to 1 mL of total reaction volume) were added into the reaction vessel under air atmosphere. The screw cap was tightened and the vial immersed in an oil bath at the indicated temperature. The alcohol (0.5 mmol) was added via syringe in portions (5 x 0.1 mmol) with 1 h interval (from 0 to 4 h, unless otherwise indicated). After 24 h (unless otherwise stated) the reaction mixture was brought to room temperature and purified by column chromatography on silica gel using mixtures of EtOAc in petroleum ether or EtOAc in pentane as eluent (see individual compounds for eluent composition).

### 4.4. Synthetic details and analytical data for products 2a-2y', 3a-3f, 4a-4c

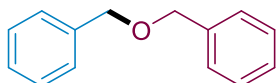

Compound **2a** was synthesized according to a reported procedure<sup>4</sup> and used as reference for kinetic analysis. Analytical data matches with the literature.<sup>5</sup>  $^1\text{H}$  NMR (400 MHz,  $\text{CDCl}_3$ )  $\delta$  7.53 – 7.18 (m, 10H), 4.58 (s, 4H).  $^{13}\text{C}$  NMR (100 MHz,  $\text{CDCl}_3$ )  $\delta$  138.35, 128.49, 127.87, 127.72, 72.18.

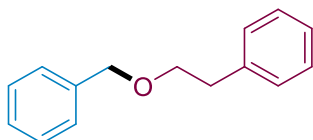

Compound **2b** was synthesized according to the general procedure B in 0.25 mmol scale, using 1.0 mmol of 2-phenylethanol at 100 °C for 24 h. Under these conditions, the selectivity towards the unsymmetrical ether was 12:1 (determined by crude  $^1\text{H}$ -NMR). The product was isolated as yellow oil in 84% yield (49 mg, 0.21 mmol **2b**, isolated with 0.02 mmol of **2a**, calculated by  $^1\text{H}$ -NMR). Flash column chromatography eluent: 4% EtOAc in petroleum ether.  $R_f$ =0.74 (10% EtOAc in pentane). Alternatively, compound **2b** was synthesized according to the general procedure C in 0.5 mmol scale, using 1.0 mmol of 2-phenylethanol at 100 °C for 24 h. The product was isolated as yellow oil in 84% yield (99 mg, 0.42 mmol **2b**, isolated with 0.05 mmol of **2a**, calculated by  $^1\text{H}$ -NMR). Analytical data matches with reported literature.<sup>6</sup>  $^1\text{H}$  NMR (400 MHz,  $\text{CDCl}_3$ )  $\delta$  7.54 – 7.06 (m, 10H), 4.52 (s, 2H), 3.69 (t,  $J$  = 7.2 Hz, 2H), 2.93 (t,  $J$  = 7.2 Hz, 2H).  $^{13}\text{C}$  NMR (125 MHz,  $\text{CDCl}_3$ )  $\delta$  139.10, 138.54, 129.07, 128.50, 128.48, 127.75, 127.67, 126.33, 73.10, 71.39, 36.52.

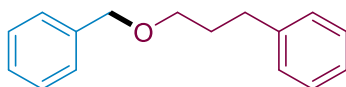

Compound **2c** was synthesized according to the general procedure B in 0.25 mmol scale, using 1.0 mmol of 3-phenylpropanol at 100 °C for 24 h. The product was isolated as colorless oil in 82% yield (50 mg, 0.204 mmol **2c**, isolated with 0.019 mmol of **2a**, calculated by  $^1\text{H}$ -NMR). Flash column chromatography eluent: 5% EtOAc in petroleum ether.  $R_f$ =0.70 (10% EtOAc in pentane). Alternatively, compound **2c** was synthesized according to the general procedure C in 0.5 mmol scale, using 1.0 mmol of 3-phenylpropanol at 100 °C for 24 h. NMR yield: 67% yield (0.333 mmol **2b**). Analytical data matches with reported literature.<sup>7</sup>  $^1\text{H}$  NMR (400 MHz,  $\text{CDCl}_3$ )  $\delta$  7.45 – 7.32 (m, 4H), 7.32 – 7.24 (m, 3H), 7.22 – 7.15 (m, 3H), 4.51 (s, 2H), 3.50 (t,  $J$  = 6.4 Hz, 2H), 2.77 – 2.66 (m, 2H), 2.01 – 1.86 (m, 2H).  $^{13}\text{C}$  NMR (100 MHz,  $\text{CDCl}_3$ )  $\delta$  142.11, 138.71, 128.61, 128.53, 128.50, 128.43, 127.80, 127.66, 125.87, 73.04, 69.62, 32.51, 31.50.

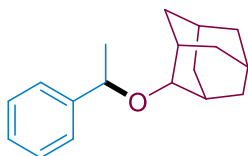

Compound **2d** was synthesized according to the general procedure B in 0.25 mmol scale, using 1.0 mmol of 2-adamantanol at 80 °C for 18 h. The product was isolated as colorless oil in 56% yield (36 mg, 0.14 mmol **2d**). Flash column chromatography eluent: 4% EtOAc in petroleum ether.  $R_f$ =0.92 (10% EtOAc in pentane). Alternatively, compound **2d** was synthesized according to the general procedure C in 0.5 mmol scale, using 1.0 mmol of 2-adamantanol at 80 °C for 18 h. NMR yield: 61% (0.303 mmol **2d**).  $^1\text{H}$  NMR (400 MHz,  $\text{CDCl}_3$ )  $\delta$  7.41 – 7.18 (m, 5H), 4.58 (q,  $J$  = 6.5 Hz, 1H), 3.43 – 3.34 (m, 1H), 2.22 – 2.11 (m, 2H), 2.11 – 2.05 (m, 1H), 1.89 – 1.72 (m, 5H), 1.71 – 1.69 (m, 2H), 1.58 – 1.45 (m, 4H), 1.43 (d,  $J$  = 6.5 Hz, 3H).  $^{13}\text{C}$  NMR (100 MHz,  $\text{CDCl}_3$ )  $\delta$  145.35, 128.34, 127.06, 126.18, 78.76, 73.71, 37.81, 36.85, 36.53, 33.26, 31.94, 31.76, 31.09, 27.71, 27.62, 24.96. HRMS (HESI)  $m/z$ :  $[\text{M}+\text{NH}_4]^+$  calcd for  $\text{C}_{18}\text{H}_{28}\text{ON}$  274.2171; found 274.2164.

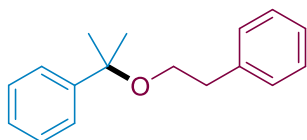

Compound **2e** was synthesized according to the general procedure B in 0.25 mmol scale, using 1.0 mmol of 2-phenylethanol at 60 °C for 0.75 h. The product was isolated as colorless oil in 60% yield (36 mg, 0.15 mmol **2e**). Flash column chromatography eluent: 4% EtOAc in petroleum ether.  $R_f$ =0.74 (10% EtOAc in pentane). Alternatively, compound **2e** was synthesized according to the general procedure C in 0.5 mmol scale, using 1.0 mmol of 2-phenylethanol at 60 °C for 0.75 h (addition of 5 x 0.1 mmol portions every 5 min, from 0 to 20 min of reaction time). NMR yield: 71% (0.353 mmol **2e**). Analytical data matches with reported literature.<sup>8</sup>  $^1\text{H}$  NMR (400 MHz,  $\text{CDCl}_3$ )  $\delta$  7.36 – 7.08 (m, 10H), 3.35 (t,  $J$  = 7.4 Hz, 2H), 2.83 (t,  $J$  =

7.4 Hz, 2H), 1.50 (s, 6H).  $^{13}\text{C}$  NMR (100 MHz,  $\text{CDCl}_3$ )  $\delta$  146.54, 139.35, 129.19, 128.31, 128.24, 126.86, 126.19, 125.80, 76.79, 64.22, 37.26, 28.49.

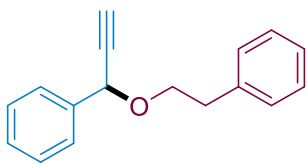

Compound **2f** was synthesized according to the general procedure B in 0.5 mmol scale, using 2.0 mmol of 2-phenylethanol at 80 °C for 1.5 h. The product was isolated as yellow oil in 91% yield (108 mg, 0.457 mmol **2f**). Flash column chromatography eluent: 5% EtOAc in pentane.  $R_f$ =0.62 (5% EtOAc in pentane). Alternatively, compound **2f** was synthesized according to the general procedure C in 0.5 mmol scale, using 1.0 mmol of 2-phenylethanol at 80 °C for 1.5 h (addition of 5 x 0.1 mmol portions every 10 min, from 0 to 40 min of reaction time). The product was isolated as yellow oil in 85% yield (101 mg, 0.427 mmol **2f**). Analytical data matches with reported literature.<sup>9</sup>  $^1\text{H}$  NMR (400 MHz,  $\text{CDCl}_3$ )  $\delta$  7.53 – 7.45 (m, 2H), 7.41 – 7.19 (m, 8H), 5.19 (d,  $J$  = 2.2 Hz, 1H), 3.90 (dt,  $J$  = 9.1, 7.3 Hz, 1H), 3.73 (dt,  $J$  = 9.1, 7.3 Hz, 1H), 2.96 (t,  $J$  = 7.3 Hz, 2H), 2.64 (d,  $J$  = 2.2 Hz, 1H).  $^{13}\text{C}$  NMR (100 MHz,  $\text{CDCl}_3$ )  $\delta$  138.83, 138.29, 129.10, 128.63, 128.57, 128.48, 127.40, 126.38, 81.75, 75.74, 71.53, 69.39, 36.33.

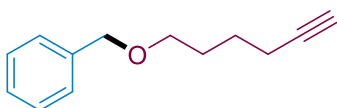

Compound **2g** was synthesized according to the general procedure B in 0.25 mmol scale, using 1.0 mmol of 5-hexyn-1-ol at 100 °C for 24 h. Under these conditions, the selectivity towards the unsymmetrical ether was 5.9:1 (determined by crude  $^1\text{H}$ -NMR). The product was isolated as colorless oil in 45% yield (26 mg, 0.113 mmol **2g**, isolated with 0.023 mmol **2a**, calculated by  $^1\text{H}$ -NMR). Flash column chromatography eluent: 4% EtOAc in petroleum ether.  $R_f$ =0.70 (10% EtOAc in pentane). Alternatively, compound **2g** was synthesized according to the general procedure C in 0.5 mmol scale, using 1.0 mmol of 5-hexyn-1-ol at 100 °C for 24 h. Under these conditions, the selectivity towards the unsymmetrical ether was 2.8:1 (determined by crude  $^1\text{H}$ -NMR). NMR yield: 41% (0.21 mmol **2g**). Analytical data matches with reported literature.<sup>10</sup>  $^1\text{H}$  NMR (400 MHz,  $\text{CDCl}_3$ )  $\delta$  7.41 – 7.25 (m, 5H), 4.51 (s, 2H), 3.51 (t,  $J$  = 6.2 Hz, 2H), 2.23 (td,  $J$  = 7.0, 2.6 Hz, 2H), 1.95 (t,  $J$  = 2.6 Hz, 1H), 1.80 – 1.71 (m, 2H), 1.69 – 1.59 (m, 2H).  $^{13}\text{C}$  NMR (100 MHz,  $\text{CDCl}_3$ )  $\delta$  138.70, 128.49, 127.74, 127.65, 84.47, 73.01, 69.86, 68.53, 28.90, 25.37, 18.34.

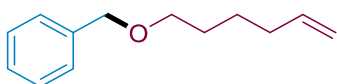

Compound **2h** was synthesized according to the general procedure B in 0.25 mmol scale, using 1.0 mmol of 5-hexen-1-ol at 100 °C for 24 h. Under these conditions, the selectivity towards the unsymmetrical ether was 6.3:1 (determined by crude  $^1\text{H}$ -NMR). The product was isolated as colorless oil in 54% yield (30 mg, 0.134 mmol **2h**, isolated with 0.023 mmol **2a**, calculated by  $^1\text{H}$ -NMR). Flash column chromatography eluent: 4% EtOAc in petroleum ether.  $R_f$ =0.76 (10% EtOAc in pentane). Alternatively, compound **2h** was synthesized according to the general procedure C in 0.5 mmol scale, using 1.0 mmol of 5-hexen-1-ol at 100 °C for 24 h. Under these conditions, the selectivity towards the unsymmetrical ether was 3.5:1 (determined by crude  $^1\text{H}$ -NMR). NMR yield: 60% (0.30 mmol **2h**). Analytical data matches with reported literature.<sup>11</sup>  $^1\text{H}$  NMR (400 MHz,  $\text{CDCl}_3$ )  $\delta$  7.44 – 7.25 (m, 5H), 5.88 – 5.77 (m, 1H), 5.04 – 5.00 (m, 2H), 4.52 (s, 2H), 3.49 (t,  $J$  = 6.5 Hz, 2H), 2.09 (tdt,  $J$  = 7.9, 6.6, 1.4 Hz, 2H), 1.71 – 1.58 (m, 2H), 1.56 – 1.44 (m, 2H).  $^{13}\text{C}$  NMR (100 MHz,  $\text{CDCl}_3$ )  $\delta$  138.88, 128.47, 127.91, 127.73, 127.60, 114.63, 72.99, 70.37, 33.68, 29.35, 25.63.

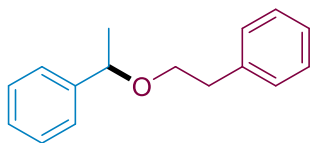

Compound **2i** was synthesized according to the general procedure B in 0.5 mmol scale, using 1.0 mmol of 2-phenylethanol at 80 °C for 20 h, starting from (S)-1-phenylethanol. The product was isolated as yellow oil in 73% yield (83 mg, 0.37 mmol **2i**). Flash column chromatography eluent: 3% EtOAc in petroleum ether.  $R_f$ =0.81 (10% EtOAc in pentane). Alternatively, compound **2i** was synthesized according to the general procedure B in 0.25 mmol scale, using 1.0 mmol of 2-phenylethanol at 80 °C for 20 h. NMR yield: 80% yield (0.201 mmol **2i**). Alternatively, compound **2i** was synthesized according to the general procedure C in 0.5 mmol scale, using 1.0 mmol of 2-phenylethanol at 80 °C for 20 h. NMR yield: 72% yield (0.358 mmol **2i**). Analytical data matches with reported literature.<sup>12</sup>  $^1\text{H}$  NMR (400 MHz,  $\text{CDCl}_3$ )  $\delta$  7.41 – 7.11 (m, 10H), 4.41 (q,  $J$  = 6.5 Hz, 1H), 3.52 (t,  $J$  = 7.3 Hz, 2H), 2.95 – 2.82 (m, 2H), 1.43 (d,  $J$  = 6.4 Hz, 3H).  $^{13}\text{C}$  NMR (125 MHz,  $\text{CDCl}_3$ )  $\delta$  144.08, 139.18, 129.08, 128.51, 128.38, 127.47, 126.26, 126.23, 78.23, 69.74, 36.70, 24.26. HPLC: Chiralcel OJ-RH column, 60:40 ACN:H<sub>2</sub>O (0.1% formic acid), 1.0 mL/min;  $t_R$  = 8.5 min / 9.5 min, 0% ee. A racemate prepared from ( $\pm$ )-1-phenylethanol was used for comparison.

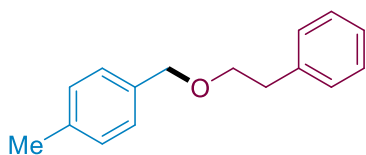

Compound **2j** was synthesized according to the general procedure B in 0.25 mmol scale, using 1.0 mmol of 2-phenylethanol at 100 °C for 1.5 h. The product was isolated as yellow oil in 92% yield (52 mg, 0.23 mmol **2j**). Flash column chromatography eluent: 4% EtOAc in petroleum ether.  $R_f$ =0.88 (10% EtOAc in pentane).  $^1\text{H}$  NMR (400 MHz,  $\text{CDCl}_3$ )  $\delta$  7.31 – 7.01 (m, 10H), 4.41 (s, 2H), 3.60 (t,  $J$  = 7.2 Hz, 2H), 2.85 (t,  $J$  = 7.2 Hz, 2H), 2.26 (s, 3H).  $^{13}\text{C}$  NMR (100 MHz,  $\text{CDCl}_3$ )  $\delta$  139.13, 137.32, 135.47, 129.16, 129.06, 128.44, 127.85, 126.28, 72.96, 71.20, 36.51, 21.28. HRMS (HESI)  $m/z$ :  $[\text{M}+\text{NH}_4]^+$  calcd for  $\text{C}_{16}\text{H}_{22}\text{ON}$  244.1701; found 244.1693.

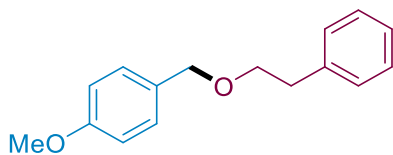

Compound **2k** was synthesized according to the general procedure B in 0.5 mmol scale, using 1.0 mmol of 2-phenylethanol at 60 °C for 1 h. The product was isolated as colorless oil in 78% yield (95 mg, 0.39 mmol **2k**). Flash column chromatography eluent: 4% EtOAc in petroleum ether.  $R_f$ =0.63 (10% EtOAc in pentane). Alternatively, compound **2k** was synthesized according to the general procedure B in 0.25 mmol scale, using 1.0 mmol of 2-phenylethanol at 60 °C for 1 h. The product was isolated as colorless oil in 97% yield (59 mg, 0.243 mmol **2k**). Alternatively, compound **2k** was synthesized according to the general procedure C in 0.5 mmol scale, using 1.0 mmol of 2-phenylethanol at 60 °C for 1 h (addition of 5 x 0.1 mmol portions every 10 min, from 0 to 40 min of reaction time). The product was isolated as colorless oil in 86% yield (104 mg, 0.429 mmol **2k**). Analytical data matches with reported literature.<sup>6</sup>  $^1\text{H}$  NMR (400 MHz,  $\text{CDCl}_3$ )  $\delta$  7.38 – 7.18 (m, 7H), 6.90 (d,  $J$  = 8.7 Hz, 2H), 4.49 (s, 2H), 3.83 (s, 3H), 3.70 (t,  $J$  = 7.2 Hz, 2H), 2.95 (t,  $J$  = 7.2 Hz, 2H).  $^{13}\text{C}$  NMR (125 MHz,  $\text{CDCl}_3$ )  $\delta$  159.28, 139.14, 130.63, 129.38, 129.07, 128.47, 126.31, 113.90, 72.77, 71.11, 55.42, 36.52.

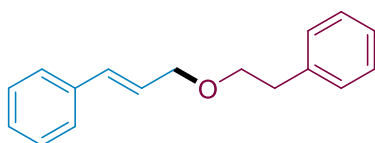

Compound **2l** was synthesized according to the general procedure B in 0.25 mmol scale, using 1.0 mmol of 2-phenylethanol at 60 °C for 3h. The product was isolated as colorless oil in

71% yield (42 mg, 0.176 mmol **2l**). Flash column chromatography eluent: 2%-6% Et<sub>2</sub>O in petroleum ether.  $R_f$ =0.67 (10% EtOAc in pentane). Analytical data matches with reported literature.<sup>13</sup> <sup>1</sup>H NMR (400 MHz, CDCl<sub>3</sub>)  $\delta$  7.44 – 7.15 (m, 10H), 6.58 (d,  $J$  = 16.0 Hz, 1H), 6.28 (dt,  $J$  = 15.9, 6.0 Hz, 1H), 4.17 (dd,  $J$  = 6.0, 1.5 Hz, 2H), 3.72 (t,  $J$  = 7.2 Hz, 2H), 2.95 (t,  $J$  = 7.2 Hz, 2H). <sup>13</sup>C NMR (125 MHz, CDCl<sub>3</sub>)  $\delta$  139.08, 136.88, 132.38, 129.08, 128.68, 128.52, 127.77, 126.62, 126.37, 126.30, 71.63, 71.41, 36.57.

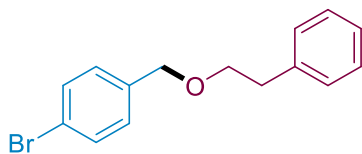

Compound **2m** was synthesized according to the general procedure B in 0.25 mmol scale, using 1.0 mmol of 2-phenylethanol at 100 °C for 24 h. Under these conditions, the selectivity towards the unsymmetrical ether was 6.7:1 (determined by crude <sup>1</sup>H-NMR). The product was isolated as yellow oil in 54% yield (45 mg, 0.134 mmol **2m**, isolated with 0.017 mmol of bis-(4-bromobenzyl ether)<sup>14</sup>, calculated by <sup>1</sup>H-NMR). Flash column chromatography eluent: 4% EtOAc in petroleum ether.  $R_f$ =0.70 (10% EtOAc in pentane). Alternatively, compound **2m** was synthesized according to the general procedure C in 0.5 mmol scale, using 1.0 mmol of 2-phenylethanol at 100 °C for 24 h. NMR yield: 53% yield (0.267 mmol **2m**). Analytical data matches with reported literature.<sup>15</sup> <sup>1</sup>H NMR (400 MHz, CDCl<sub>3</sub>)  $\delta$  7.45 (d,  $J$  = 8.4 Hz, 2H), 7.33 – 7.19 (m, 6H), 7.16 (d,  $J$  = 8.3 Hz, 2H), 4.47 (s, 2H), 3.69 (t,  $J$  = 7.1 Hz, 2H), 2.93 (t,  $J$  = 7.1 Hz, 2H). <sup>13</sup>C NMR (100 MHz, CDCl<sub>3</sub>)  $\delta$  138.99, 137.60, 131.71, 131.58, 129.50, 129.31, 129.10, 129.06, 128.50, 126.40, 121.48, 72.30, 71.48, 36.49.

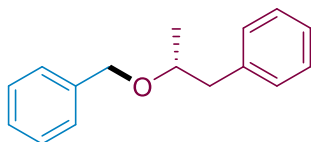

Compound **2n** was synthesized according to the general procedure B in 0.5 mmol scale, using 1.0 mmol of (R)-3-phenyl-2-propanol at 100 °C for 24 h. Under these conditions, the selectivity towards the unsymmetrical ether was 3:1 (determined by crude <sup>1</sup>H-NMR). The product was isolated as yellow oil in 55% yield (79 mg, 0.27 mmol **2n**, isolated with 0.08 mmol of **2a**, calculated by <sup>1</sup>H-NMR). Flash column chromatography eluent: 3% EtOAc in petroleum ether.  $R_f$ =0.81 (10% EtOAc in pentane). Alternatively, compound **2n** was synthesized according to the general procedure B in 0.25 mmol scale, using 1.0 mmol of 2-phenylethanol at 100 °C for 24 h. NMR yield: 65% yield (0.162 mmol **2n**). Alternatively, compound **2n** was synthesized according to the general procedure C in 0.5 mmol scale, using 1.0 mmol of 2-phenylethanol at 100 °C for 24 h. NMR yield: 53% yield (0.264 mmol **2n**). Analytical data matches with reported literature.<sup>16</sup> <sup>1</sup>H NMR (400 MHz, CDCl<sub>3</sub>)  $\delta$  7.45 – 7.11 (m, 10H), 4.56 – 4.41 (m, 2H), 3.76 – 3.71 (m, 1H), 2.96 (dd,  $J$  = 13.5, 6.4 Hz, 1H), 2.70 (dd,  $J$  = 13.5, 6.4 Hz, 1H), 1.19 (d,  $J$  = 6.1 Hz, 3H). <sup>13</sup>C NMR (125 MHz, CDCl<sub>3</sub>)  $\delta$  139.22, 139.00, 129.67, 128.43, 128.35, 127.69, 127.51, 126.22, 76.31, 70.75, 43.36, 19.70. HPLC: Chiralcel OJ-RH column, 90:10 ACN:H<sub>2</sub>O (0.1% formic acid), 1.0 mL/min;  $t_R$ = 2.6 min (minor) / 2.7 min (major), 84% ee. A racemate prepared starting from (±)-3-phenyl-2-propanol was used for comparison.

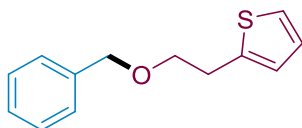

Compound **2o** was synthesized according to the general procedure B in 0.25 mmol scale, using 1.0 mmol of 2-thiophenethanol at 100 °C for 24 h. NMR yield: 37%. The product was isolated as waxy colorless solid by prep TLC (5% EtOAc in petroleum ether).  $R_f$  = 0.40 (20% EtOAc in petroleum ether). Analytical data matches with reported literature.<sup>17</sup> <sup>1</sup>H NMR (500 MHz, CDCl<sub>3</sub>)  $\delta$  7.38 – 7.27 (m, 5H), 7.15 (dd,  $J$  = 5.1, 1.0 Hz, 1H), 6.94 (dd,  $J$  = 5.1, 3.4 Hz, 1H), 6.86 (m, 1H), 4.56 (s, 2H), 3.72 (t,  $J$  = 6.8 Hz, 2H), 3.15 (t,  $J$  = 6.8 Hz, 2H). <sup>13</sup>C NMR (125 MHz, CDCl<sub>3</sub>)  $\delta$  141.45, 138.39, 128.54, 127.82, 127.75, 126.82, 125.29, 123.78, 73.22, 71.08, 30.67.

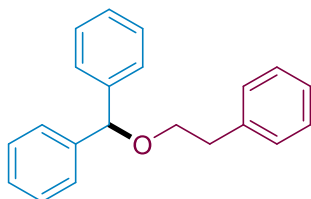

Compound **2p** was synthesized according to the general procedure B in 0.25 mmol scale, using 1.0 mmol of 2-phenylethanol at 60 °C for 0.75 h. The product was isolated as colorless oil in 96% yield (69 mg, 0.24 mmol **2p**). Flash column chromatography eluent: 4% EtOAc in petroleum ether.  $R_f$ =0.77 (10% EtOAc in pentane). Analytical data matches with reported literature.<sup>8</sup>  $^1\text{H}$  NMR (400 MHz,  $\text{CDCl}_3$ )  $\delta$  7.38 – 7.16 (m, 15H), 5.35 (s, 1H), 3.67 (t,  $J$  = 7.1 Hz, 2H), 2.97 (t,  $J$  = 7.1 Hz, 2H).  $^{13}\text{C}$  NMR (100 MHz,  $\text{CDCl}_3$ )  $\delta$  142.50, 139.26, 129.19, 128.48, 128.40, 127.49, 127.06, 126.28, 83.90, 70.16, 36.68.

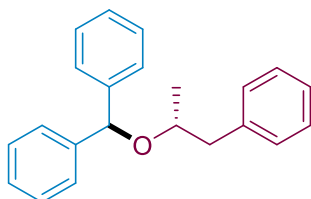

Compound **2q** was synthesized according to the general procedure B in 0.25 mmol scale, using 1.0 mmol of (R)-3-phenyl-2-propanol at 60 °C for 0.75 h. Under these conditions, the selectivity towards the unsymmetrical ether was 8.2:1 (determined by crude  $^1\text{H}$ -NMR). The product was isolated as colorless oil in 67% yield (59 mg, 0.167 mmol **2q**, isolated with 0.02 mmol of bis(diphenyl)methyl ether<sup>5</sup>, calculated by  $^1\text{H}$ -NMR). Flash column chromatography eluent: 4%-8% EtOAc in petroleum ether.  $R_f$ =0.84 (10% EtOAc in pentane).  $^1\text{H}$  NMR (400 MHz,  $\text{CDCl}_3$ )  $\delta$  7.42 – 7.11 (m, 15H), 5.47 (s, 1H), 3.73 (sext,  $J$  = 6.2 Hz, 1H), 2.99 (dd,  $J$  = 13.4, 6.6 Hz, 1H), 2.74 (dd,  $J$  = 13.4, 6.3 Hz, 1H), 1.20 (d,  $J$  = 6.1 Hz, 3H).  $^{13}\text{C}$  NMR (100 MHz,  $\text{CDCl}_3$ )  $\delta$  143.27, 142.57, 139.26, 129.80, 128.44, 128.36, 128.29, 127.37, 127.34, 127.25, 127.07, 126.18, 80.98, 74.07, 43.70, 19.74. HPLC: Chiralcel OJ-RH column, 70:30 ACN:H<sub>2</sub>O (0.1% formic acid), 1.0 mL/min;  $t_R$ = 6.9 min (minor) / 7.4 min (major), 96% ee. A racemate prepared starting from ( $\pm$ )-3-phenyl-2-propanol was used for comparison. HRMS (HESI)  $m/z$ :  $[\text{M}+\text{NH}_4]^+$  calcd for  $\text{C}_{22}\text{H}_{26}\text{ON}$  320.2014; found 320.2008.

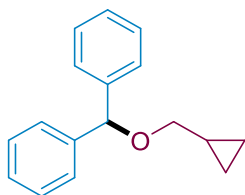

Compound **2r** was synthesized according to the general procedure B in 0.25 mmol scale, using 1.0 mmol of cyclopropanemethanol at 60 °C for 1 h. The product was isolated as colorless oil in 77% yield (46 mg, 0.193 mmol **2r**). Flash column chromatography eluent: 4% EtOAc in petroleum ether.  $R_f$ =0.82 (10% EtOAc in pentane). Analytical data matches with reported literature.<sup>18</sup>  $^1\text{H}$  NMR (400 MHz,  $\text{CDCl}_3$ )  $\delta$  7.48 – 7.21 (m, 10H), 5.46 (s, 1H), 3.37 (d,  $J$  = 6.8 Hz, 2H), 1.25 – 1.10 (m, 1H), 0.62 – 0.53 (m, 2H), 0.24 (dt,  $J$  = 6.1, 4.5 Hz, 2H).  $^{13}\text{C}$  NMR (100 MHz,  $\text{CDCl}_3$ )  $\delta$  142.60, 128.48, 127.47, 127.17, 83.23, 73.76, 10.88, 3.22.

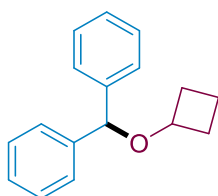

Compound **2s** was synthesized according to the general procedure B in 0.25 mmol scale, using 1.0 mmol of cyclobutanol at 60 °C for 1 h. Under these conditions, the selectivity towards the unsymmetrical ether was 10.2:1 (determined by crude  $^1\text{H}$ -NMR). The product was isolated as colorless oil in 81% yield (52 mg, 0.203 mmol **2s**, isolated with 0.01 mmol of bis(diphenyl)methyl ether<sup>5</sup>, calculated by  $^1\text{H}$ -NMR). Flash column chromatography eluent: 4% EtOAc in petroleum ether.  $R_f$ =0.85 (10% EtOAc in pentane).

$^1\text{H}$  NMR (400 MHz,  $\text{CDCl}_3$ )  $\delta$  7.46 – 7.22 (m, 10H), 5.39 (s, 1H), 4.03 (quin,  $J = 7.4$  Hz, 1H), 2.22 – 2.14 (m, 2H), 2.12 – 2.02 (m, 2H), 1.75 – 1.68 (m, 1H), 1.51 – 1.39 (m, 1H).  $^{13}\text{C}$  NMR (100 MHz,  $\text{CDCl}_3$ )  $\delta$  142.64, 128.41, 127.45, 127.24, 80.82, 71.56, 30.83, 12.74. HRMS (HESI)  $m/z$ :  $[\text{M}+\text{NH}_4]^+$  calcd for  $\text{C}_{17}\text{H}_{22}\text{ON}$  256.1701; found 256.1699.

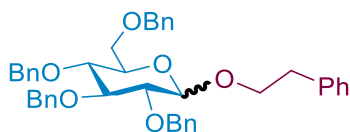

Compound **2t** was synthesized according to the general procedure B in 0.25 mmol scale, using 1.0 mmol of 2-phenylethanol at 60 °C for 18 h. The product was isolated as pale yellow oil in 74% yield (119 mg, 0.185 mmol **2t**, 50:50 mixture of  $\alpha$  and  $\beta$  anomers, determined by  $^1\text{H}$ -NMR). Flash column chromatography eluent: 10%-20% EtOAc in petroleum ether.  $R_f=0.37$  (10% EtOAc in pentane). Analytical data matches with reported literature.<sup>19</sup>  $^1\text{H}$  NMR (400 MHz,  $\text{CDCl}_3$ )  $\delta$  7.37 – 7.13 (m, 25H), 4.99 (d,  $J = 10.8$  Hz, 1H,  $\beta$ ), 4.92 (d,  $J = 10.9$  Hz, 1H,  $\alpha$ ), 4.84 – 4.74 (m, 3H), 4.65 – 4.46 (m, 3H), 4.46 – 4.33 (m, 2H), 4.22 (dt,  $J = 9.5, 6.7$  Hz, 1H,  $\beta$ ), 4.01 – 3.96 (m, 1H,  $\alpha$ ), 3.89 – 3.38 (m, 7H), 3.05 – 2.88 (m, 2H).  $^{13}\text{C}$  NMR (100 MHz,  $\text{CDCl}_3$ )  $\delta$  139.02 ( $\alpha/\beta$ ), 138.83 ( $\alpha/\beta$ ), 138.78 ( $\alpha/\beta$ ), 138.63 ( $\beta$ ), 138.52 ( $\alpha$ ), 138.48 ( $\alpha$ ), 138.32 ( $\beta$ ), 138.25 ( $\beta$ ), 138.09 ( $\alpha$ ), 129.14 ( $\alpha$ ), 129.07 ( $\beta$ ), 128.55 ( $\alpha/\beta$ ), 128.52 ( $\alpha/\beta$ ), 128.50 ( $\alpha/\beta$ ), 128.48 ( $\alpha/\beta$ ), 128.43 ( $\alpha/\beta$ ), 128.28 ( $\alpha/\beta$ ), 128.16 ( $\alpha/\beta$ ), 128.12 ( $\alpha/\beta$ ), 128.00 ( $\alpha/\beta$ ), 127.96 ( $\alpha/\beta$ ), 127.92 ( $\alpha/\beta$ ), 127.89 ( $\alpha/\beta$ ), 127.78 ( $\alpha/\beta$ ), 127.75 ( $\alpha/\beta$ ), 127.71 ( $\alpha$ ), 126.43 ( $\alpha/\beta$ ), 103.79 ( $\beta$ ), 97.00 ( $\alpha$ ), 84.82 ( $\beta$ ), 82.38 ( $\beta$ ), 82.14 ( $\alpha$ ), 80.17 ( $\alpha$ ), 78.03 ( $\beta$ ), 77.82 ( $\alpha$ ), 75.82 ( $\alpha/\beta$ ), 75.14 ( $\beta$ ), 75.04 ( $\alpha$ ), 75.01 ( $\beta$ ), 74.85 ( $\beta$ ), 73.64 ( $\beta$ ), 73.58 ( $\alpha$ ), 73.32 ( $\alpha$ ), 70.78 ( $\beta$ ), 70.33 ( $\alpha$ ), 69.11 ( $\beta$ ), 68.92 ( $\alpha$ ), 68.62 ( $\alpha$ ), 36.44 ( $\beta$ ), 36.16 ( $\alpha$ ).

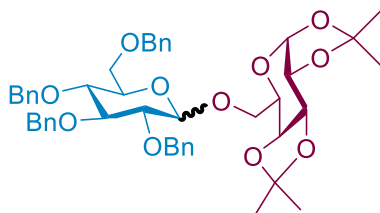

Compound **2u** was synthesized according to the general procedure B in 0.25 mmol scale, using 0.5 mmol of 1,2:3,4-Di-O-isopropylidene- $\alpha$ -D-galactopyranose at 60 °C for 18 h. The product was isolated as colorless oil in 50% yield (98 mg, 0.125 mmol **2u**, 60:40 mixture of  $\alpha$  and  $\beta$  anomers, determined by  $^1\text{H}$ -NMR). Flash column chromatography eluent: 10%-20% EtOAc in petroleum ether.  $R_f=0.30$  (10% EtOAc in pentane). Analytical data matches with reported literature.<sup>20</sup>  $^1\text{H}$  NMR (500 MHz,  $\text{CDCl}_3$ )  $\delta$  7.37 – 7.33 (m, 2H,  $\beta$ ), 7.31 – 7.16 (m, 18H), 7.08 – 7.05 (m, 2H), 5.50 (d,  $J = 5.0$  Hz, 1H,  $\beta$ ), 5.45 (d,  $J = 5.0$  Hz, 1H,  $\alpha$ ), 4.99 (d,  $J = 11.1$  Hz, 1H,  $\beta$ ), 4.94 – 4.92 (m, 2H,  $\alpha$ ), 4.88 (d,  $J = 10.9$  Hz, 1H,  $\beta$ ), 4.75 (d,  $J = 10.3$  Hz, 1H,  $\alpha$ ), 4.73 – 4.68 (m, 3H), 4.67 – 4.59 (m, 3H), 4.57 – 4.48 (m, 5H), 4.46 – 4.34 (m, 4H), 4.29 (dd,  $J = 7.9, 2.0$  Hz, 1H,  $\alpha$ ), 4.26 – 4.23 (m, 2H), 4.18 (dd,  $J = 7.9, 1.9$  Hz, 1H,  $\beta$ ), 4.09 (dd,  $J = 10.7, 3.7$  Hz, 1H,  $\beta$ ), 4.03 – 4.01 (m, 1H,  $\beta$ ), 3.98 – 3.95 (m, 1H), 3.91 (t,  $J = 9.2$  Hz, 1H,  $\alpha$ ), 3.78 – 3.49 (m, 12H), 3.42 – 3.34 (m, 2H,  $\beta$ ), 1.46 (s, 3H,  $\alpha$ ), 1.43 (s, 3H,  $\beta$ ), 1.38 (s, 3H), 1.25 (s, 6H), 1.24 (s, 6H).  $^{13}\text{C}$  NMR (125 MHz,  $\text{CDCl}_3$ )  $\delta$  139.06 ( $\alpha$ ), 138.82 ( $\beta$ ), 138.47 ( $\alpha$ ), 138.46 ( $\alpha$ ), 138.28 ( $\beta$ ), 138.26 ( $\beta$ ), 138.09 ( $\alpha$ ), 128.74 ( $\beta$ ), 128.45 ( $\alpha/\beta$ ), 128.31 ( $\alpha/\beta$ ), 128.08 ( $\beta$ ), 128.03 ( $\alpha$ ), 128.01 ( $\alpha$ ), 127.98 ( $\beta$ ), 127.92 ( $\alpha/\beta$ ), 127.80 ( $\alpha/\beta$ ), 127.75 ( $\alpha/\beta$ ), 127.73 ( $\alpha/\beta$ ), 127.70 ( $\alpha/\beta$ ), 127.64 ( $\alpha/\beta$ ), 127.62 ( $\alpha/\beta$ ), 127.58 ( $\beta$ ), 109.47 ( $\beta$ ), 109.30 ( $\alpha$ ), 108.69 ( $\alpha$ ), 108.67 ( $\beta$ ), 104.50 ( $\beta$ ), 97.16 ( $\alpha$ ), 96.50 ( $\beta$ ), 96.42 ( $\alpha$ ), 84.66 ( $\beta$ ), 82.07 ( $\alpha$ ), 81.74 ( $\beta$ ), 79.92 ( $\alpha$ ), 77.84 ( $\beta$ ), 77.69 ( $\alpha$ ), 75.76 ( $\beta$ ), 75.73 ( $\alpha$ ), 75.09 ( $\alpha/\beta$ ), 74.86 ( $\beta$ ), 74.45 ( $\beta$ ), 73.60 ( $\beta$ ), 73.57 ( $\alpha$ ), 72.46 ( $\alpha$ ), 71.55 ( $\beta$ ), 70.92 ( $\alpha$ ), 70.89 ( $\alpha$ ), 70.77 ( $\beta$ ), 70.75 ( $\alpha$ ), 70.59 ( $\beta$ ), 70.33 ( $\alpha$ ), 69.81 ( $\beta$ ), 68.88 ( $\beta$ ), 68.48 ( $\alpha$ ), 67.47 ( $\beta$ ), 66.32 ( $\alpha$ ), 65.81 ( $\alpha$ ), 26.28 ( $\alpha$ ), 26.19 ( $\alpha$ ), 26.15 ( $\beta$ ), 26.11 ( $\beta$ ), 25.14 ( $\beta$ ), 25.04 ( $\alpha$ ), 24.76 ( $\alpha$ ), 24.56 ( $\beta$ ).

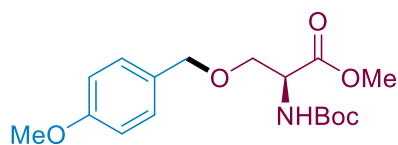

Compound **2v** was synthesized according to the general procedure B in 0.5 mmol scale, using 0.5 mmol of N-Boc-L-serine methyl ester at 60 °C for 48 h. The product was isolated as colorless oil in 23% yield (40 mg, 0.117 mmol **2v**). Flash column chromatography eluent: 12% EtOAc in petroleum ether.  $R_f$  = 0.60 (20% EtOAc in petroleum ether). Analytical data matches with reported literature.<sup>21</sup>  $^1\text{H}$  NMR (400 MHz,  $\text{CDCl}_3$ )  $\delta$  7.23 – 7.16 (m, 2H), 6.90 – 6.84 (m, 2H), 5.36 (br d,  $J$  = 8.3 Hz, 1H), 4.50 – 4.38 (m, 3H), 3.82 (m, 1H), 3.80 (s, 3H), 3.73 (s, 3H), 3.65 (dd,  $J$  = 9.4, 3.2 Hz, 1H), 1.45 (s, 9H).  $^{13}\text{C}$  NMR (125 MHz,  $\text{CDCl}_3$ )  $\delta$  171.37, 159.48, 155.64, 129.77, 129.40, 113.95, 80.20, 77.41, 77.16, 76.90, 73.05, 69.73, 55.42, 54.14, 52.55, 28.46.

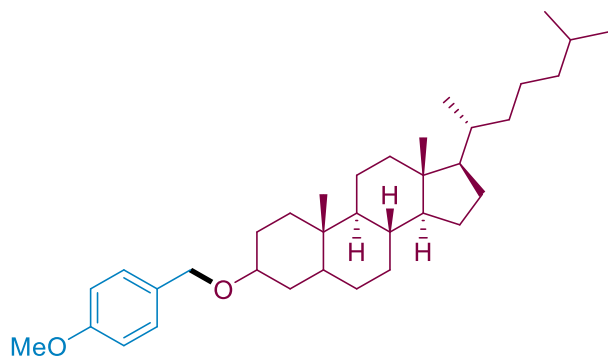

Compound **2w** was synthesized according to the general procedure B in 0.237 mmol scale, using 0.5 mmol of  $\beta$ -cholestanol at 60 °C for 18 h. Under these conditions, the selectivity towards the unsymmetrical ether was 4:1 (determined by crude  $^1\text{H}$ -NMR). The product was isolated as white solid in 62% yield (75 mg, 0.147 mmol **2w**, isolated with 0.004 mmol of 4,4'-dimethoxydibenzyl ether<sup>22</sup>, calculated by  $^1\text{H}$ -NMR). Flash column chromatography eluent: 5%-10% EtOAc in petroleum ether.  $R_f$ =0.65 (10% EtOAc in pentane). Analytical data matches with reported literature.<sup>23</sup>  $^1\text{H}$  NMR (400 MHz,  $\text{CDCl}_3$ )  $\delta$  7.27 – 7.25 (m, 2H), 6.88 – 6.86 (m, 2H), 4.51 – 4.45 (m, 2H), 3.80 (s, 3H), 3.35 – 3.27 (m, 1H), 1.96 (dt,  $J$  = 12.5, 3.4 Hz, 1H), 1.92 – 1.62 (m, 6H), 1.60 – 0.93 (m, 24H), 0.90 (d,  $J$  = 6.5 Hz, 3H), 0.87 – 0.85 (m, 6H), 0.80 (s, 3H), 0.65 (s, 3H).  $^{13}\text{C}$  NMR (100 MHz,  $\text{CDCl}_3$ )  $\delta$  159.14, 131.49, 129.24, 113.89, 77.88, 69.55, 56.68, 56.45, 55.42, 54.60, 45.04, 42.76, 40.22, 39.67, 37.20, 36.33, 35.95, 35.66, 35.02, 32.29, 29.04, 28.46, 28.40, 28.16, 24.37, 23.98, 22.96, 22.71, 21.38, 18.82, 12.44, 12.22.

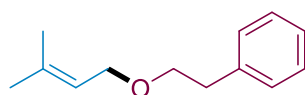

Compound **2x** was synthesized from 2-methyl-3-buten-2-ol according to the general procedure B in 0.25 mmol scale, using 1.0 mmol of 2-phenylethanol at 60 °C for 1.5 h. The linear:branched ether selectivity was 9:1 (determined by crude  $^1\text{H}$ -NMR). The product was isolated as colorless oil in 53% yield (25 mg, 0.132 mmol **2x**). Alternatively, compound **2x** was synthesized from prenol according to the general procedure B in 0.25 mmol scale, using 1.0 mmol of 2-phenylethanol at 60 °C for 1.5 h. The linear:branched ether selectivity was 7:1 (determined by crude  $^1\text{H}$ -NMR). The product was isolated as colorless oil in 34% yield (16 mg, 0.084 mmol **2x**). Flash column chromatography eluent: 2%-4%  $\text{Et}_2\text{O}$  in petroleum ether.  $R_f$ =0.63 (10% EtOAc in pentane). Analytical data matches with reported literature.<sup>24</sup>  $^1\text{H}$  NMR (400 MHz,  $\text{CDCl}_3$ )  $\delta$  7.41 – 7.12 (m, 5H), 5.44 – 5.29 (m, 1H), 3.99 (d,  $J$  = 6.9 Hz, 2H), 3.64 (t,  $J$  = 7.4 Hz, 2H), 2.91 (t,  $J$  = 7.4 Hz, 2H), 1.76 (s, 3H), 1.67 (s, 3H).  $^{13}\text{C}$  NMR (125 MHz,  $\text{CDCl}_3$ )  $\delta$  139.17, 137.04, 129.04, 128.49, 126.29, 121.29, 71.27, 67.49, 36.59, 25.96, 18.16.

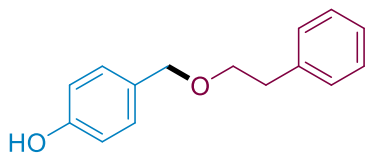

Compound **2y** was synthesized according to the general procedure B in THF in 0.25 mmol scale, using 1.0 mmol of 1-phenylethanol at 40 °C for 4 h. NMR yield: 81%. The product was isolated as white solid by preparative TLC (20% EtOAc in petroleum ether).  $R_f$  = 0.50 (20% EtOAc in petroleum ether).  $^1\text{H}$  NMR (400 MHz,  $\text{CDCl}_3$ )  $\delta$  7.37 – 7.30 (m, 2H), 7.30 – 7.20 (m, 5H), 6.85 – 6.79 (m, 2H), 5.12 (s, 1H), 4.51 (s, 2H), 3.74 (t,  $J$  = 7.3 Hz, 2H), 2.98 (t,  $J$  = 7.3 Hz, 2H).  $^{13}\text{C}$  NMR (100 MHz,  $\text{CDCl}_3$ )  $\delta$  155.31, 139.03, 130.54, 129.66, 129.06, 128.48, 126.34, 115.37, 72.78, 71.14, 36.45. HRMS (ESI)  $m/z$ :  $[\text{M}-\text{H}]^-$  calcd for  $\text{C}_{15}\text{H}_{15}\text{O}_2$  227.1072; found 227.1073.

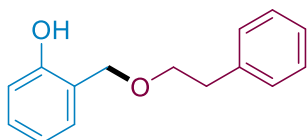

Compound **2y'** was synthesized according to the general procedure B in THF and in 0.25 mmol scale, using 1.0 mmol of 1-phenylethanol at 40 °C for 8 h. The product was isolated as colorless waxy solid in 34% yield (20 mg, 0.086 mmol **2y'**). Flash column chromatography eluent: 5-10% EtOAc in petroleum ether.  $R_f$  = 0.70 (20% EtOAc in petroleum ether).  $^1\text{H}$  NMR (400 MHz,  $\text{CDCl}_3$ )  $\delta$  7.32 – 7.29 (m, 2H), 7.27 – 7.16 (m, 4H), 6.98 (dd,  $J$  = 7.4, 1.8 Hz, 1H), 6.89 – 6.79 (m, 2H), 4.69 (s, 2H), 3.78 (t,  $J$  = 6.8 Hz, 2H), 2.95 (t,  $J$  = 6.8 Hz, 2H).  $^{13}\text{C}$  NMR (125 MHz,  $\text{CDCl}_3$ )  $\delta$  156.37, 138.34, 129.59, 128.94, 128.72, 128.13, 126.71, 122.25, 119.92, 116.71, 72.76, 71.68, 36.26. HRMS (ESI)  $m/z$ :  $[\text{M}-\text{H}]^-$  calcd for  $\text{C}_{15}\text{H}_{15}\text{O}_2$  227.1072; found 227.1074.

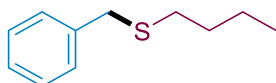

Compound **3a** was synthesized according to the general procedure B in 0.25 mmol scale, using 1.0 mmol of 1-butanethiol at 100 °C for 24 h. NMR yield: 72%. Alternatively, compound **3a** was synthesized according to the general procedure B in 0.5 mmol scale, using 1.0 mmol of 1-butanethiol at 100 °C for 24 h. The product was isolated as colorless oil in 59% yield (53 mg, 0.29 mmol **3a**) by preparative TLC (100% petroleum ether).  $R_f$  = 0.65 (20% EtOAc in petroleum ether). Analytical data matches with reported literature.<sup>25</sup>  $^1\text{H}$  NMR (400 MHz,  $\text{CDCl}_3$ )  $\delta$  7.25 (m, 5H), 3.69 (s, 2H), 2.41 (m, 2H), 1.52 (quint,  $J$  = 7.3 Hz, 2H), 1.35 (sext,  $J$  = 7.3 Hz, 2H), 0.86 (t,  $J$  = 7.3 Hz, 3H).  $^{13}\text{C}$  NMR (100 MHz,  $\text{CDCl}_3$ )  $\delta$  138.83, 128.93, 128.53, 126.95, 77.48, 77.36, 77.16, 76.84, 36.36, 31.46, 31.13, 22.10, 13.78.

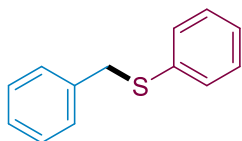

Compound **3b** was synthesized according to the general procedure B in 0.25 mmol scale, using 1.0 mmol of thiophenol at 100 °C for 24 h. The product was isolated as colorless oil in 32% yield (16 mg, 0.08 mmol **3b**). Flash column chromatography eluent: 1-2% EtOAc in petroleum ether.  $R_f$  = 0.70 (10% EtOAc in petroleum ether). Alternatively, compound **3b** was synthesized according to the general procedure B in 0.5 mmol scale, using 1.0 mmol of thiophenol at 100 °C for 24 h. The product was isolated in *ca* 20% yield by preparative TLC (100% petroleum ether). Analytical data matches with reported literature.<sup>26</sup>  $^1\text{H}$  NMR (400 MHz,  $\text{CDCl}_3$ )  $\delta$  7.36 – 7.04 (m, 10H), 4.06 (s, 2H).  $^{13}\text{C}$  NMR (100 MHz,  $\text{CDCl}_3$ )  $\delta$  137.58, 136.49, 129.95, 128.96, 128.95, 128.62, 127.30, 126.47, 39.17.

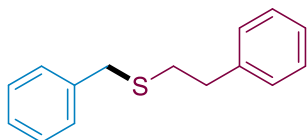

Compound **3c** was synthesized according to the general procedure B in 0.25 mmol scale, using 1.0 mmol of 2-phenylethanethiol at 100 °C for 24 h. NMR yield: 85%. Alternatively, compound **3c**

was synthesized according to the general procedure B in 0.5 mmol scale, using 0.5 mmol of 2-phenylethanethiol at 100 °C for 24 h. The product was isolated with minor impurities in 83% yield as beige oil (95 mg, 0.415 mmol). Flash column chromatography eluent: 2% EtOAc in petroleum ether.  $R_f$  = 0.74 (10% EtOAc in petroleum ether). Analytical data matches with reported literature.<sup>27</sup>  $^1\text{H}$  NMR (400 MHz,  $\text{CDCl}_3$ )  $\delta$  7.34 – 7.14 (m, 8H), 7.13 (m, 2H), 3.69 (s, 2H), 2.81 (m, 2H), 2.64 (m, 2H).  $^{13}\text{C}$  NMR (100 MHz,  $\text{CDCl}_3$ )  $\delta$  140.62, 138.51, 128.97, 128.59, 128.53, 127.07, 126.40, 36.53, 36.12, 32.86.

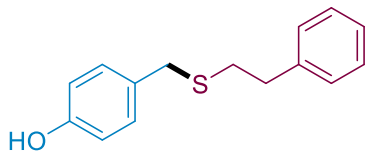

Compound **3d** was synthesized according to the general procedure B in THF in 0.25 mmol scale, using 1.0 mmol of 2-phenylethanethiol at 40 °C for 4 h. The product was isolated with minor impurities in 81% yield as colorless oil (49 mg, 0.202 mmol). Flash column chromatography eluent: 8% EtOAc in petroleum ether. Finer purification was performed by preparative TLC (5% EtOAc in petroleum ether).  $R_f$  = 0.42 (20% EtOAc in petroleum ether).  $^1\text{H}$  NMR (400 MHz,  $\text{CDCl}_3$ )  $\delta$  7.45 – 7.37 (m, 2H), 7.36 – 7.25 (m, 5H), 6.92 – 6.86 (m, 2H), 5.06 (s, 1H), 3.79 (s, 2H), 2.96 (m, 2H), 2.78 (m, 2H).  $^{13}\text{C}$  NMR (100 MHz,  $\text{CDCl}_3$ )  $\delta$  154.62, 140.68, 130.63, 130.27, 128.62, 128.58, 126.45, 115.49, 36.15, 35.93, 32.82. HRMS (HESI)  $m/z$ :  $[\text{M}-\text{H}]^-$  calcd for  $\text{C}_{15}\text{H}_{15}\text{OS}$  243.0844; found 243.0847.

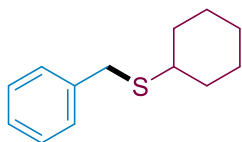

Compound **3e** was synthesized according to the general procedure B in 0.25 mmol scale, using 1.0 mmol of 2-cyclohexanethiol at 100 °C for 24 h. NMR yield: 90%. The product was purified by preparative TLC (100% petroleum ether) as colorless waxy solid.  $R_f$  = 0.74 (10% EtOAc in petroleum ether). Analytical data matches with reported literature.<sup>28</sup>  $^1\text{H}$  NMR (500 MHz,  $\text{CDCl}_3$ )  $\delta$  7.34 – 7.28 (m, 4H), 7.23 (m, 1H), 3.74 (s, 2H), 2.56 (tt,  $J$  = 10.5, 3.6 Hz, 1H), 1.99 – 1.90 (m, 2H), 1.75 (m, 2H), 1.63 – 1.51 (m, 2H), 1.39 – 1.20 (m, 4H).  $^{13}\text{C}$  NMR (125 MHz,  $\text{CDCl}_3$ )  $\delta$  139.10, 128.90, 128.58, 126.91, 43.06, 34.74, 33.52, 26.14, 26.01.

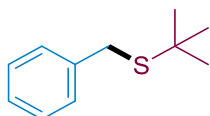

Compound **3f** was synthesized according to the general procedure B in 0.25 mmol scale, using 1.0 mmol of 2-methyl-2-propanethiol at 100 °C for 24 h. NMR yield: 46%. The product was purified by preparative TLC (100% petroleum ether) as colorless oil.  $R_f$  = 0.74 (10% EtOAc in petroleum ether). Analytical data matches with reported literature.<sup>29</sup>  $^1\text{H}$  NMR (400 MHz,  $\text{CDCl}_3$ )  $\delta$  7.38 – 7.33 (m, 2H), 7.29 (ddd,  $J$  = 7.8, 6.7, 1.3 Hz, 2H), 7.24 – 7.19 (m, 1H), 3.77 (s, 2H), 1.36 (s, 9H).  $^{13}\text{C}$  NMR (100 MHz,  $\text{CDCl}_3$ )  $\delta$  138.74, 129.10, 128.60, 126.91, 77.48, 77.16, 76.84, 43.02, 33.58, 31.06.

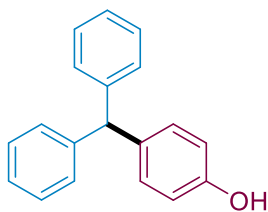

Compound **4a** was synthesized according to the general procedure B in 0.25 mmol scale, using 1.0 mmol of phenol at 60 °C for 18 h. NMR yield: 65%. Alternatively, compound **4a** was synthesized according to the general procedure B in 0.25 mmol scale, using 1.0 mmol of phenol at 60 °C for 0.75 h. The product was isolated as white solid in 46% yield (30 mg, 0.115 mmol **4a**). Flash column chromatography eluent: 10%-15% EtOAc in petroleum ether.  $R_f$  = 0.36 (10% EtOAc in pentane). Analytical data matches with reported literature.<sup>30</sup>  $^1\text{H}$  NMR (400 MHz,  $\text{CDCl}_3$ )  $\delta$  7.27 – 7.24 (m, 4H), 7.22 – 7.15 (m, 2H), 7.13

– 7.06 (m, 4H), 7.00 – 6.87 (m, 2H), 6.76 – 6.67 (m, 2H), 5.47 (s, 1H), 4.98 (s, 1H).  $^{13}\text{C}$  NMR (125 MHz,  $\text{CDCl}_3$ )  $\delta$  154.00, 144.32, 136.41, 130.71, 129.50, 128.42, 126.37, 115.27, 56.12.

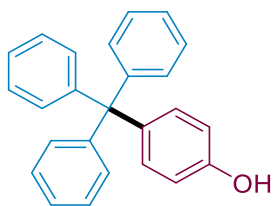

Compound **4b** was synthesized according to the general procedure B in 0.25 mmol scale, using 1.0 mmol of phenol at 60 °C for 0.75 h. The product was isolated as white solid in 29% yield (24 mg, 0.071 mmol **4b**). Flash column chromatography eluent: 5%-20% EtOAc in petroleum ether.  $R_f$ =0.27 (10% EtOAc in pentane). Analytical data matches with reported literature.<sup>31</sup>  $^1\text{H}$  NMR (400 MHz, acetone- $d_6$ )  $\delta$  8.31 (s, 1H), 7.33 – 7.24 (m, 6H), 7.23 – 7.15 (m, 9H), 7.03 – 6.97 (m, 2H), 6.78 – 6.72 (m, 2H).  $^{13}\text{C}$  NMR (125 MHz, acetone- $d_6$ )  $\delta$  156.37, 148.17, 138.50, 132.96, 131.83, 128.28, 126.72, 115.12, 65.10.

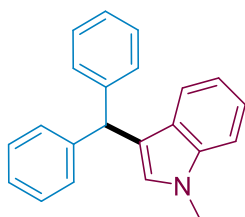

Compound **4c** was synthesized according to the general procedure B in 0.25 mmol scale, using 1.0 mmol of N-methylindole at 60 °C for 18 h. NMR yield: 93% (0.232 mmol **4c**). The product was isolated as white solid by preparative TLC (2% EtOAc in petroleum ether).  $R_f$ =0.77 (10% EtOAc in pentane). Analytical data matches with reported literature.<sup>32</sup>  $^1\text{H}$  NMR (400 MHz,  $\text{CDCl}_3$ )  $\delta$  7.43 – 7.10 (m, 13H), 6.97 (t,  $J$  = 7.5 Hz, 1H), 6.41 (s, 1H), 5.66 (s, 1H), 3.69 (s, 3H).  $^{13}\text{C}$  NMR (125 MHz,  $\text{CDCl}_3$ )  $\delta$  144.30, 137.64, 129.19, 128.91, 128.44, 127.56, 126.35, 121.81, 120.17, 119.01, 118.47, 109.29, 48.98, 32.86.

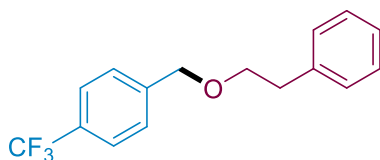

Compound **S-1** was synthesized according to the general procedure B in 0.25 mmol scale, using 1.0 mmol of 2-phenylethanol at 100 °C for 96 h. The product was isolated as colorless oil in *ca.* 5% yield by preparative TLC (3.2 mg, 0.011 mmol **S-1**, 2% EtOAc in petroleum ether).  $R_f$ =0.74 (10% EtOAc in pentane). The compound was used as reference in the kinetic analysis of the etherification of different *para*-substituted benzyl alcohols (see Section 2.8).  $^1\text{H}$  NMR (400 MHz,  $\text{CDCl}_3$ )  $\delta$  7.58 – 7.56 (m, 2H), 7.40 – 7.38 (m, 2H), 7.33 – 7.27 (m, 2H), 7.24 – 7.20 (m, 3H), 4.57 (s, 2H), 3.72 (t,  $J$  = 7.0 Hz, 2H), 2.95 (t,  $J$  = 7.0 Hz, 2H).  $^{13}\text{C}$  NMR (100 MHz,  $\text{CDCl}_3$ )  $\delta$  142.71, 138.95, 129.08, 128.53, 127.57, 126.45, 125.45, 125.41, 72.25, 71.73, 36.50.  $^{19}\text{F}$  NMR (376 MHz,  $\text{CDCl}_3$ )  $\delta$  -62.48. HRMS (HESI)  $m/z$ :  $[\text{M}+\text{NH}_4]^+$  calcd for  $\text{C}_{16}\text{H}_{19}\text{F}_3\text{ON}$  298.1419; found 298.1411.

**No desired product observed:**

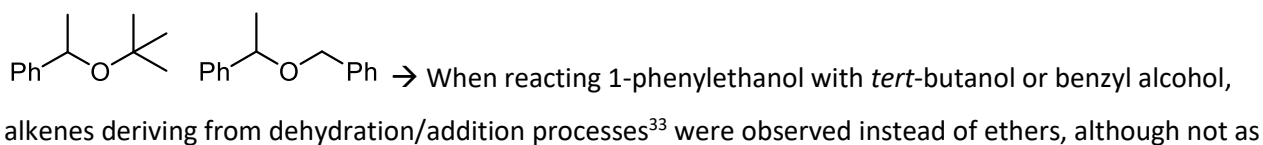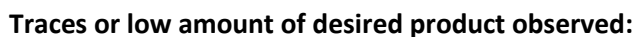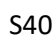

## 6. References

1. (a) D. G. Blackmond, *Angew. Chem. Int. Ed.*, 2005, **44**, 4302-4320; (b) D. G. Blackmond, *J. Am. Chem. Soc.*, 2015, **137**, 10852-10866.
2. (a) J. Burés, *Angew. Chem. Int. Ed.*, 2016, **55**, 2028-2031; (b) J. Burés, *Angew. Chem. Int. Ed.*, 2016, **55**, 16084-16087.
3. S. Hoops, S. Sahle, R. Gauges, C. Lee, J. Pahle, N. Simus, M. Singhal, L. Xu, P. Mendes and U. Kummer, *Bioinformatics*, 2006, **22**, 3067-3074.
4. A. K. Chakraborti and S. V. Chankeshwara, *J. Org. Chem.*, 2009, **74**, 1367-1370.
5. L. A. Bivona, F. Quertinmont, H. A. Beejapur, F. Giacalone, M. Buaki-Sogo, M. Gruttadauria and C. Aprile, *Adv. Synth. Catal.*, 2015, **357**, 800-810.
6. J. W. Gathirwa and T. Maki, *Tetrahedron*, 2012, **68**, 370-375.
7. H. Fujita, S. Kakuyama and M. Kunishima, *Eur. J. Org. Chem.*, 2017, **2017**, 833-839.
8. T. Shintou and T. Mukaiyama, *J. Am. Chem. Soc.*, 2004, **126**, 7359-7367.
9. K. Tsuchida, M. Yuki, K. Nakajima and Y. Nishibayashi, *Chem. Lett.*, 2018, **47**, 671-673.
10. B. L. Nilsson, L. E. Overman, J. Read de Alaniz and J. M. Rohde, *J. Am. Chem. Soc.*, 2008, **130**, 11297-11299.
11. H. Iwamoto, K. Kubota and H. Ito, *Chem. Commun.*, 2016, **52**, 5916-5919.
12. Q. Xu, H. Xie, P. Chen, L. Yu, J. Chen and X. Hu, *Green Chem.*, 2015, **17**, 2774-2779.
13. P. C. Young, N. A. Schopf and A.-L. Lee, *Chem. Commun.*, 2013, **49**, 4262-4264.
14. L. N. Ortiz-Trankina, J. Crain, C. Williams and J. Mack, *Green Chem.*, 2020, **22**, 3638-3642.
15. L. Wang, Y. Hashidoko and M. Hashimoto, *J. Org. Chem.*, 2016, **81**, 4464-4474.
16. S. Hamada, K. Sugimoto, M. Iida and T. Furuta, *Tetrahedron Lett.*, 2019, **60**, 151277.
17. S. Zhong, A. Hafner, C. Hussal, M. Nieger and S. Bräse, *RSC Adv.*, 2015, **5**, 6255-6258.
18. V. H. Tran, M. T. La and H.-K. Kim, *Org. Biomol. Chem.*, 2019, **17**, 6221-6228.
19. R. Iwata, K. Uda, D. Takahashi and K. Toshima, *Chem. Commun.*, 2014, **50**, 10695-10698.
20. T. Kimura, T. Eto, D. Takahashi and K. Toshima, *Org. Lett.*, 2016, **18**, 3190-3193.
21. K. Yamada, H. Fujita, M. Kitamura and M. Kunishima, *Synthesis*, 2013, **45**, 2989-2997.
22. M. M. Guru, P. R. Thorve and B. Maji, *J. Org. Chem.*, 2020, **85**, 806-819.
23. D. K. Ahn, Y. W. Kang and S. K. Woo, *J. Org. Chem.*, 2019, **84**, 3612-3623.
24. M. Ochiai, T. Ito, H. Takahashi, A. Nakanishi, M. Toyonari, T. Sueda, S. Goto and M. Shiro, *J. Am. Chem. Soc.*, 1996, **118**, 7716-7730.
25. N. Sakai, K. Moritaka and T. Konakahara, *Eur. J. Org. Chem.*, 2009, **2009**, 4123-4127.
26. T. Itoh and T. Mase, *Org. Lett.*, 2004, **6**, 4587-4590.
27. E. L. Tyson, M. S. Ament and T. P. Yoon, *J. Org. Chem.*, 2013, **78**, 2046-2050.
28. T. Delcaillau, A. Bismuto, Z. Lian and B. Morandi, *Angew. Chem. Int. Ed.*, 2020, **59**, 2110-2114.
29. T. C. Pijper, J. Robertus, W. R. Browne and B. L. Feringa, *Org. Biomol. Chem.*, 2015, **13**, 265-268.
30. H. Li, W. Li, W. Liu, Z. He and Z. Li, *Angew. Chem. Int. Ed.*, 2011, **50**, 2975-2978.
31. A. H. G. David, R. Casares, J. M. Cuerva, A. G. Campaña and V. Blanco, *J. Am. Chem. Soc.*, 2019, **141**, 18064-18074.
32. H. Hikawa, F. Kotaki, S. Kikkawa and I. Azumaya, *J. Org. Chem.*, 2019, **84**, 1972-1979.
33. M. Bödl and I. Fleischer, *Eur. J. Org. Chem.*, 2019, **2019**, 5856-5861.

## 7. $^1\text{H}$ -NMR and $^{13}\text{C}$ -NMR spectra for compounds 2a-2y', 3a-3f, 4a-4c

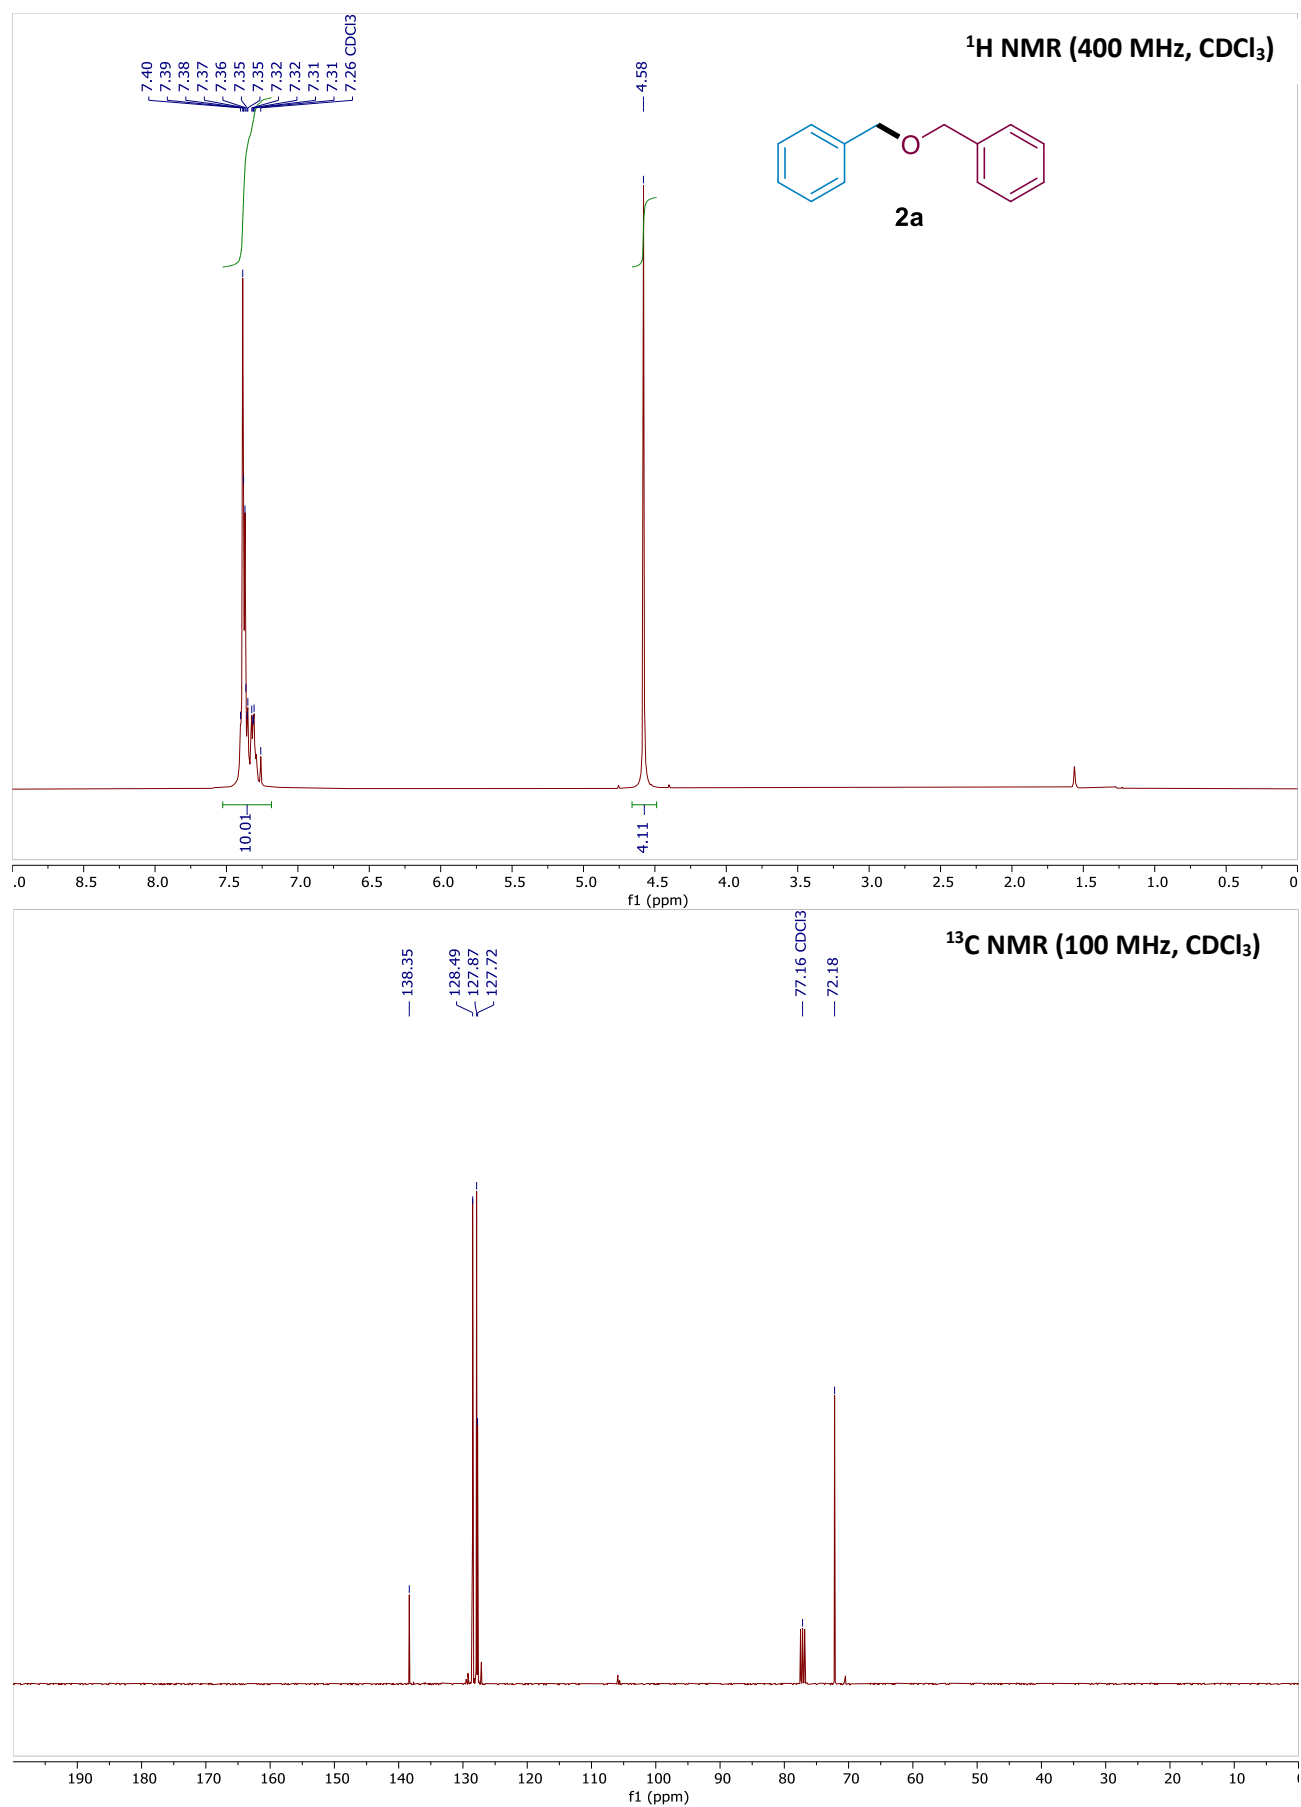

**<sup>1</sup>H NMR (400 MHz, CDCl<sub>3</sub>)**

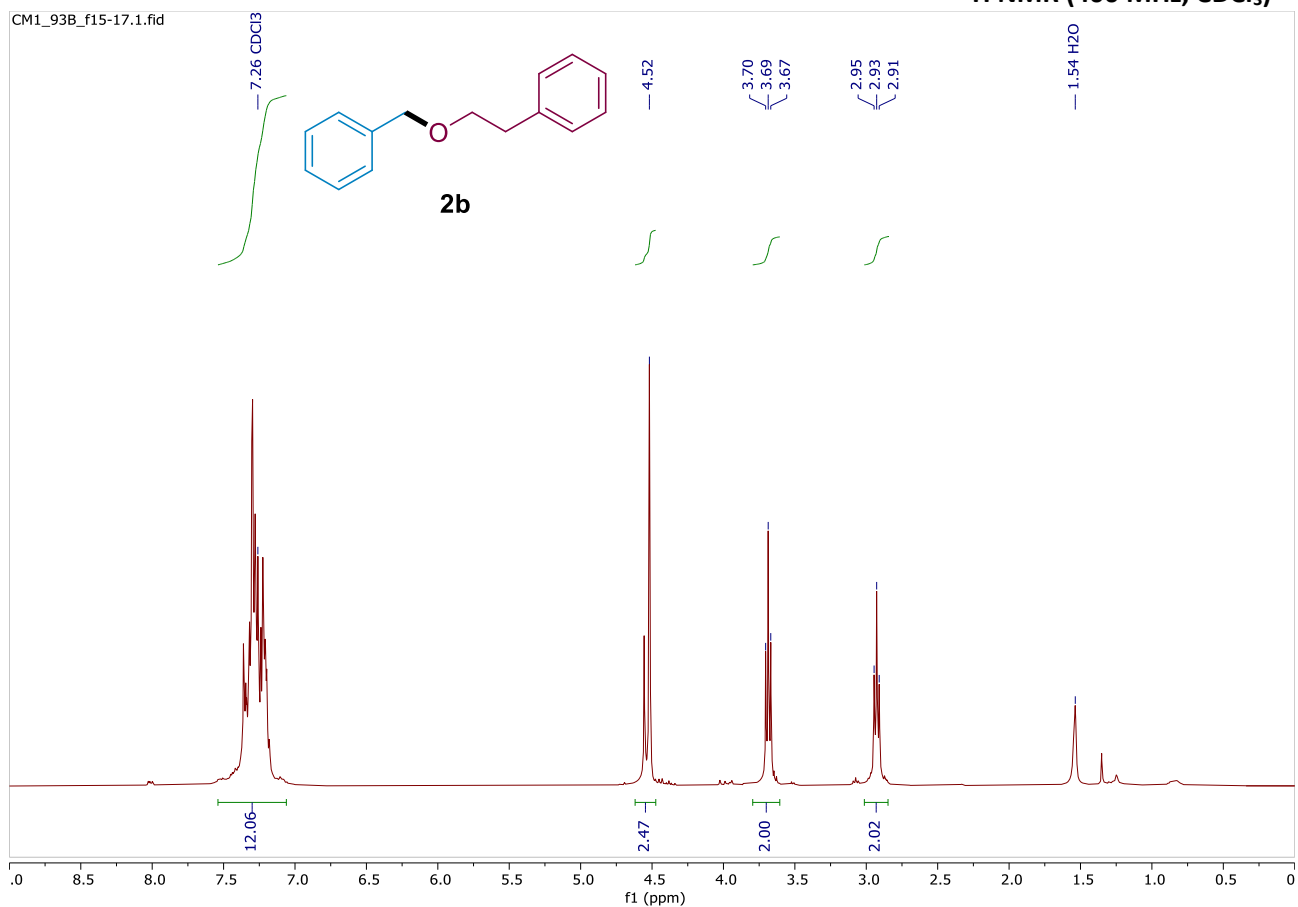

**<sup>13</sup>C NMR (125 MHz, CDCl<sub>3</sub>)**

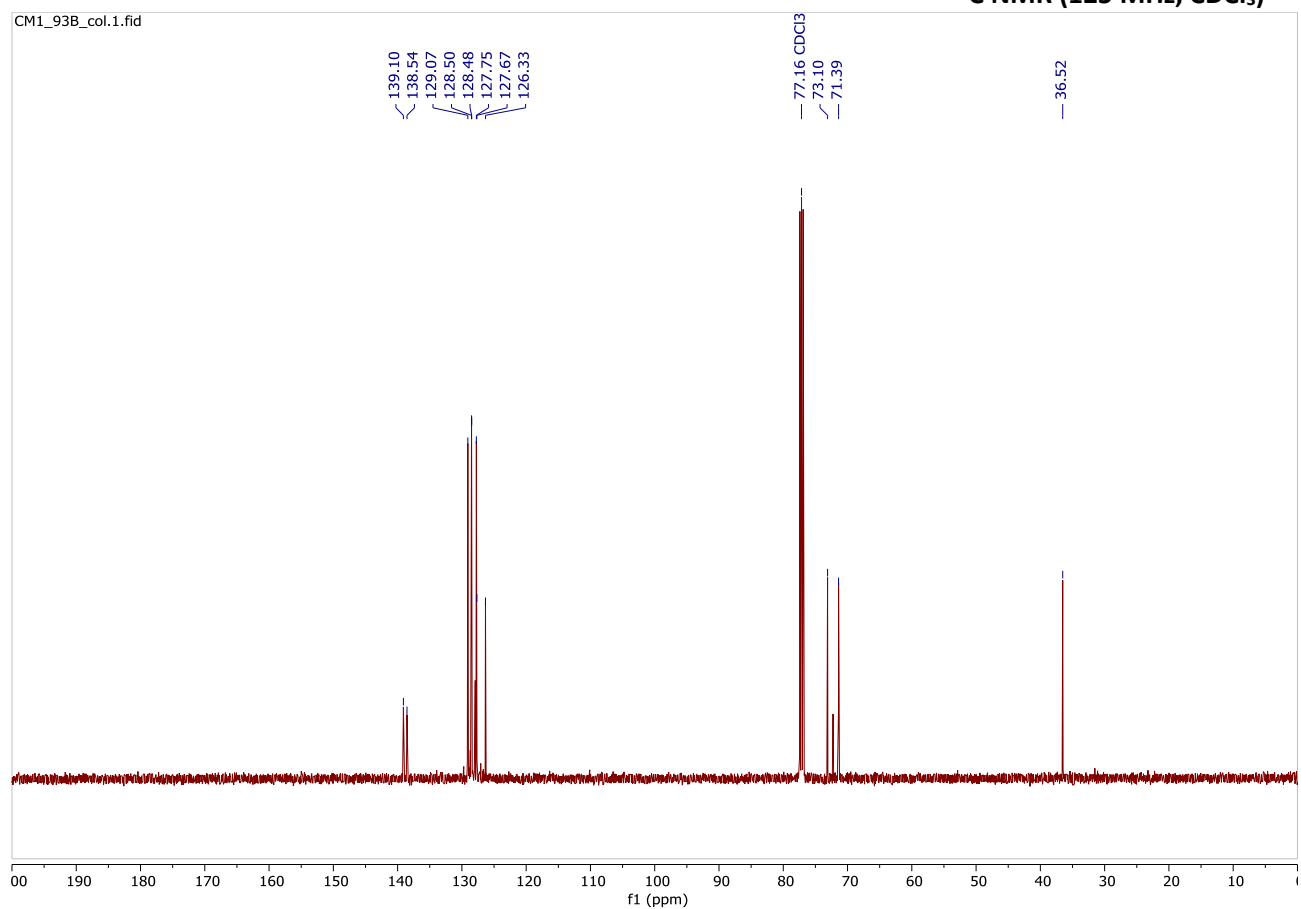

**<sup>1</sup>H NMR (400 MHz, CDCl<sub>3</sub>)**

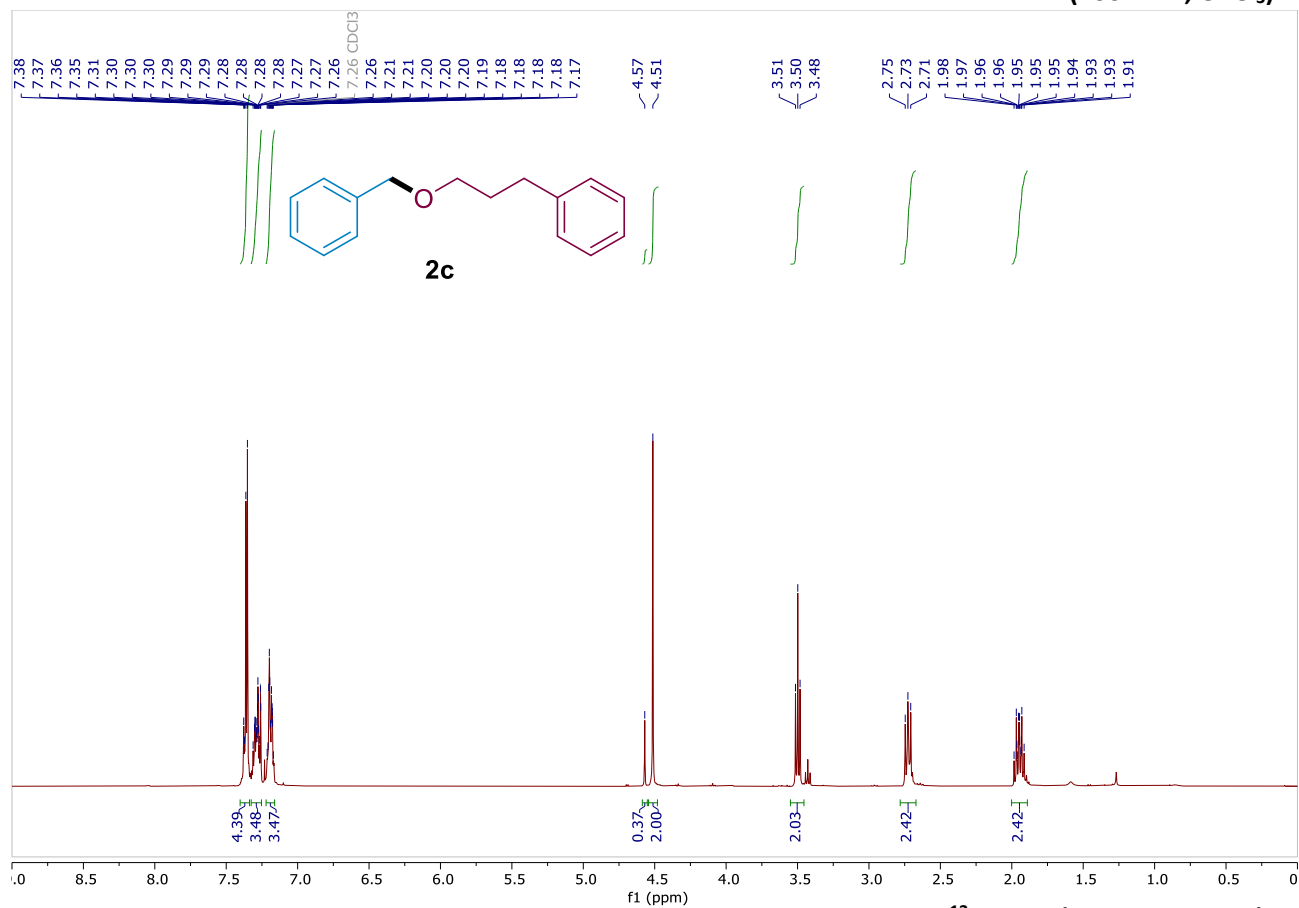

**<sup>13</sup>C NMR (100 MHz, CDCl<sub>3</sub>)**

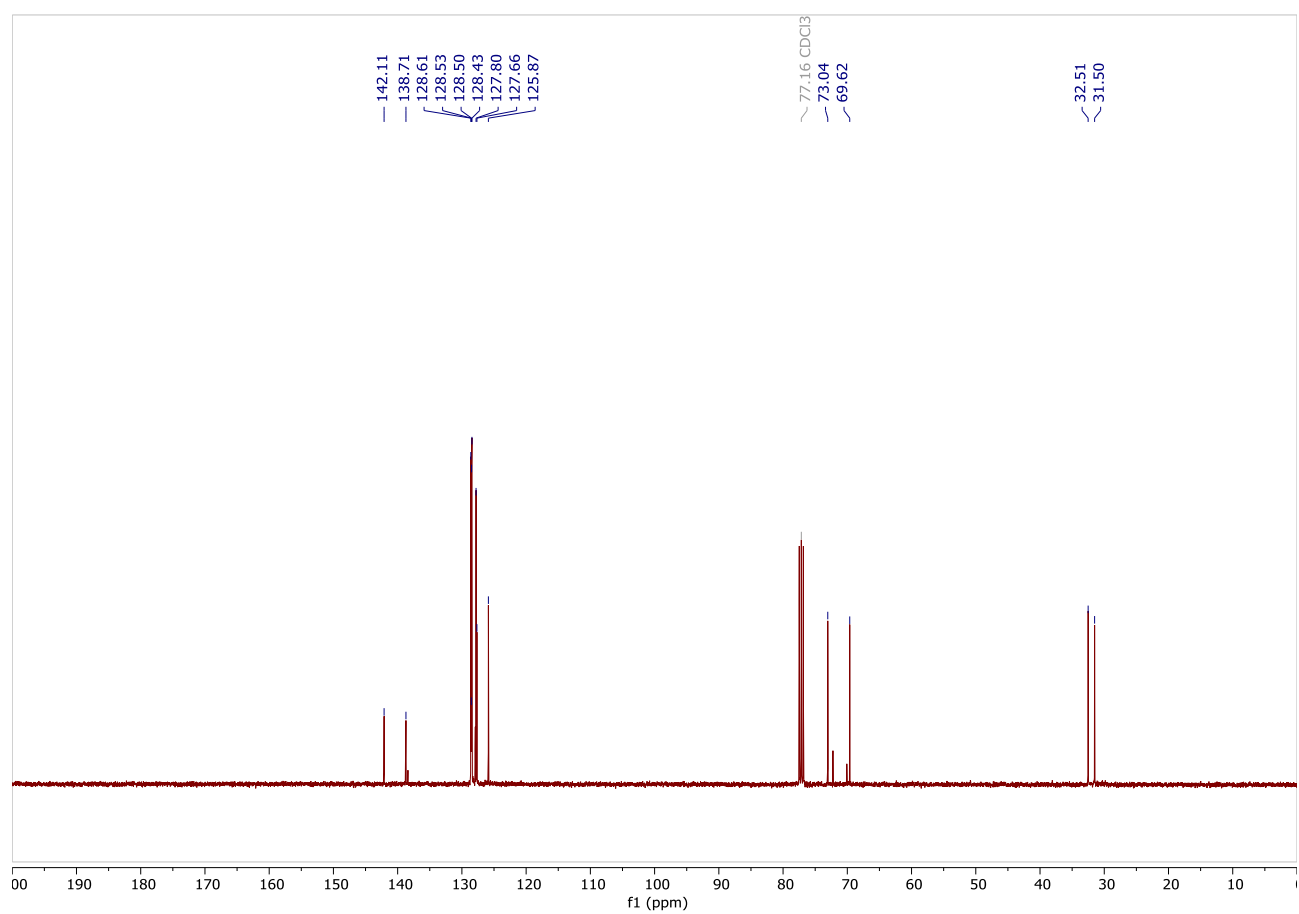

<sup>1</sup>H NMR (400 MHz, CDCl<sub>3</sub>)

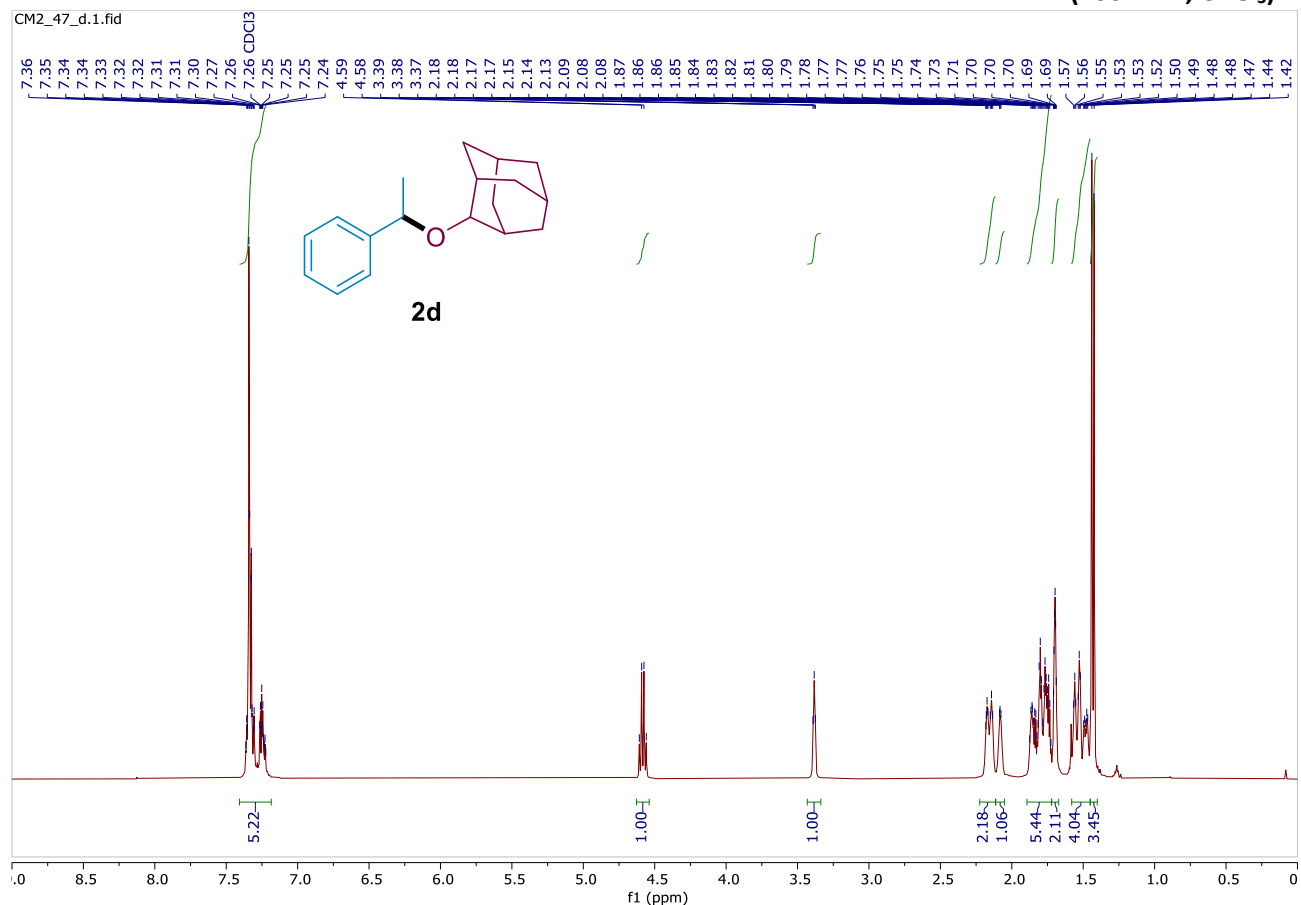

<sup>13</sup>C NMR (100 MHz, CDCl<sub>3</sub>)

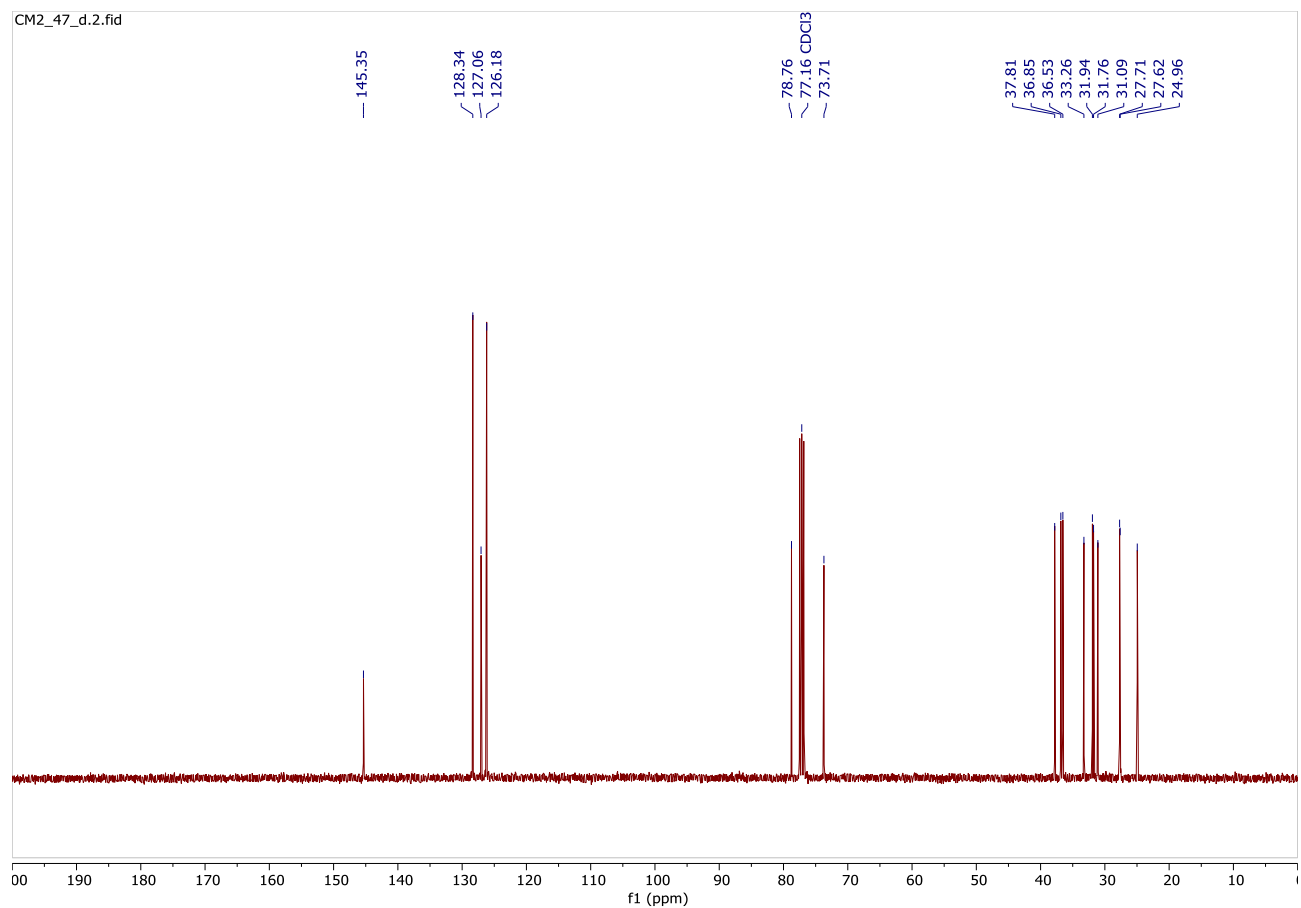

**$^1\text{H}$  NMR (400 MHz,  $\text{CDCl}_3$ )**

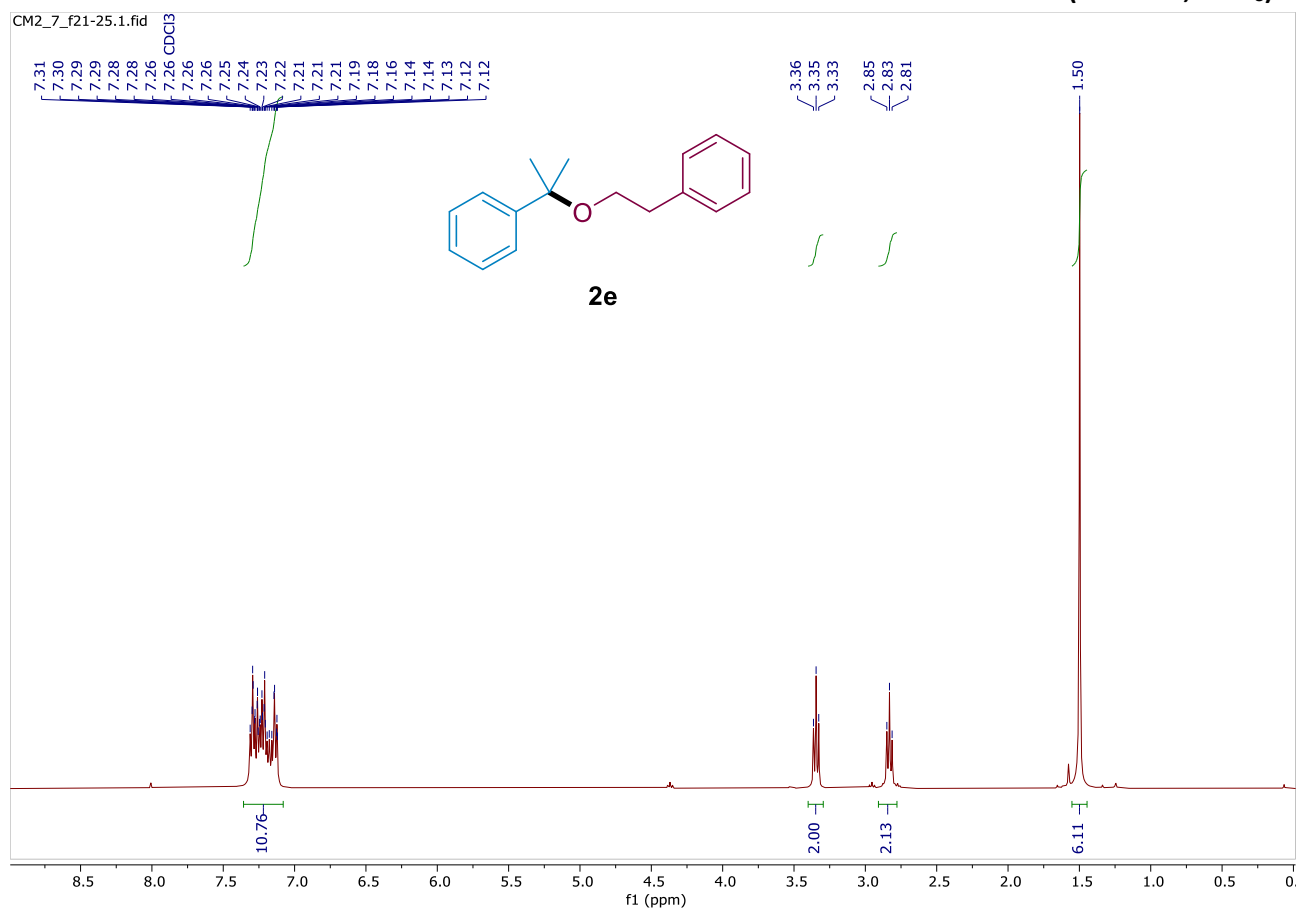

**$^{13}\text{C}$  NMR (100 MHz,  $\text{CDCl}_3$ )**

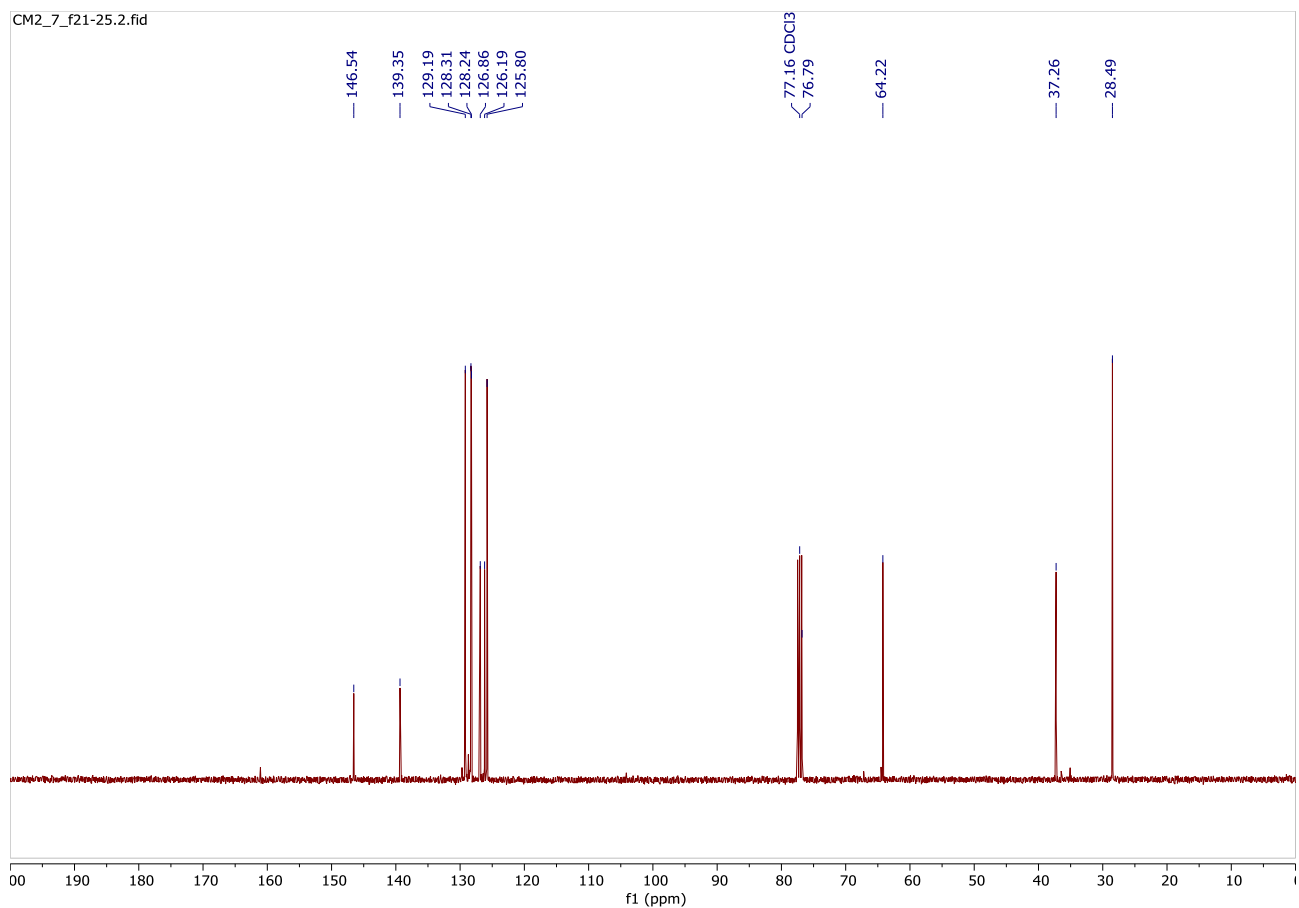

<sup>1</sup>H NMR (400 MHz, CDCl<sub>3</sub>)

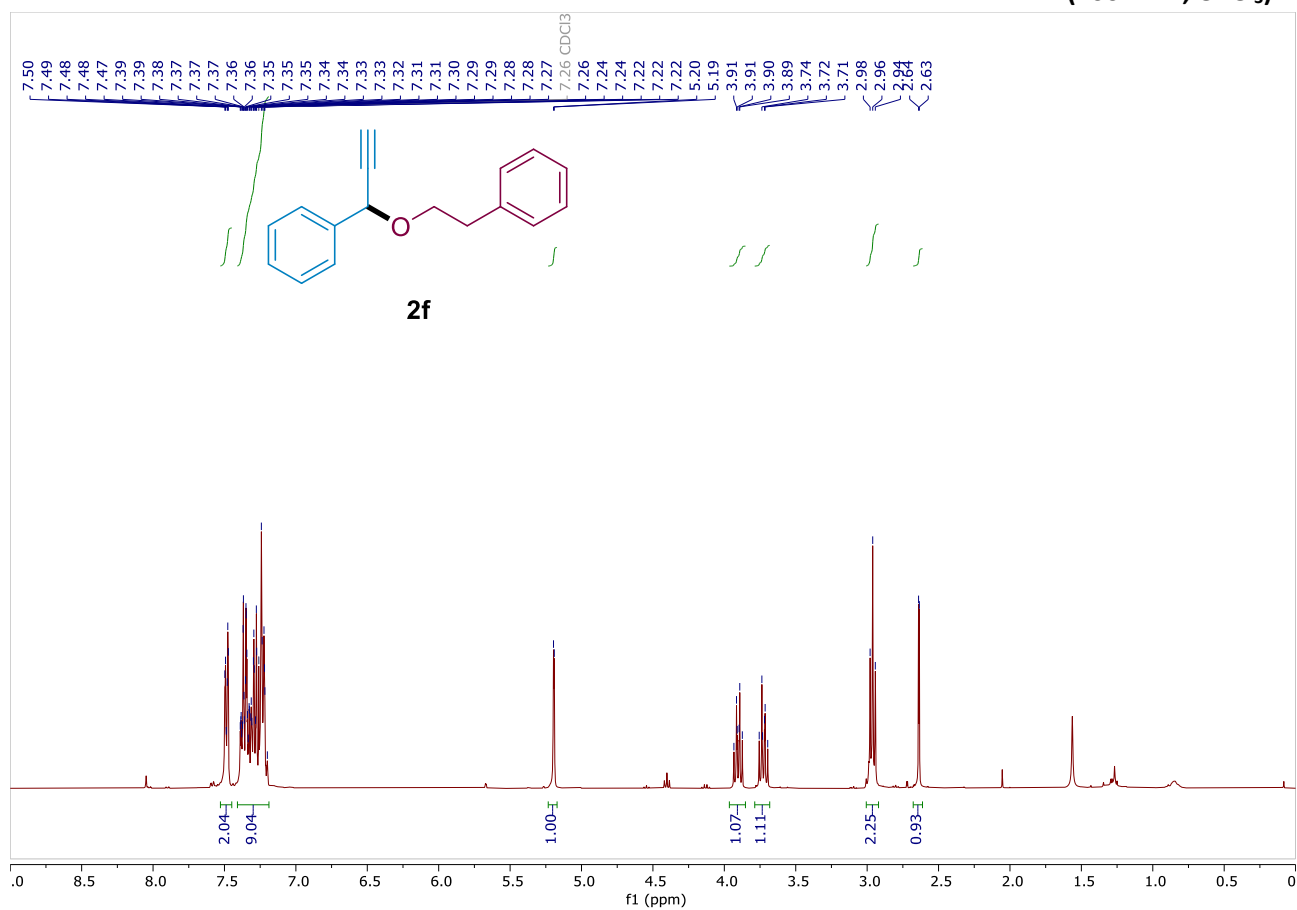

<sup>13</sup>C NMR (100 MHz, CDCl<sub>3</sub>)

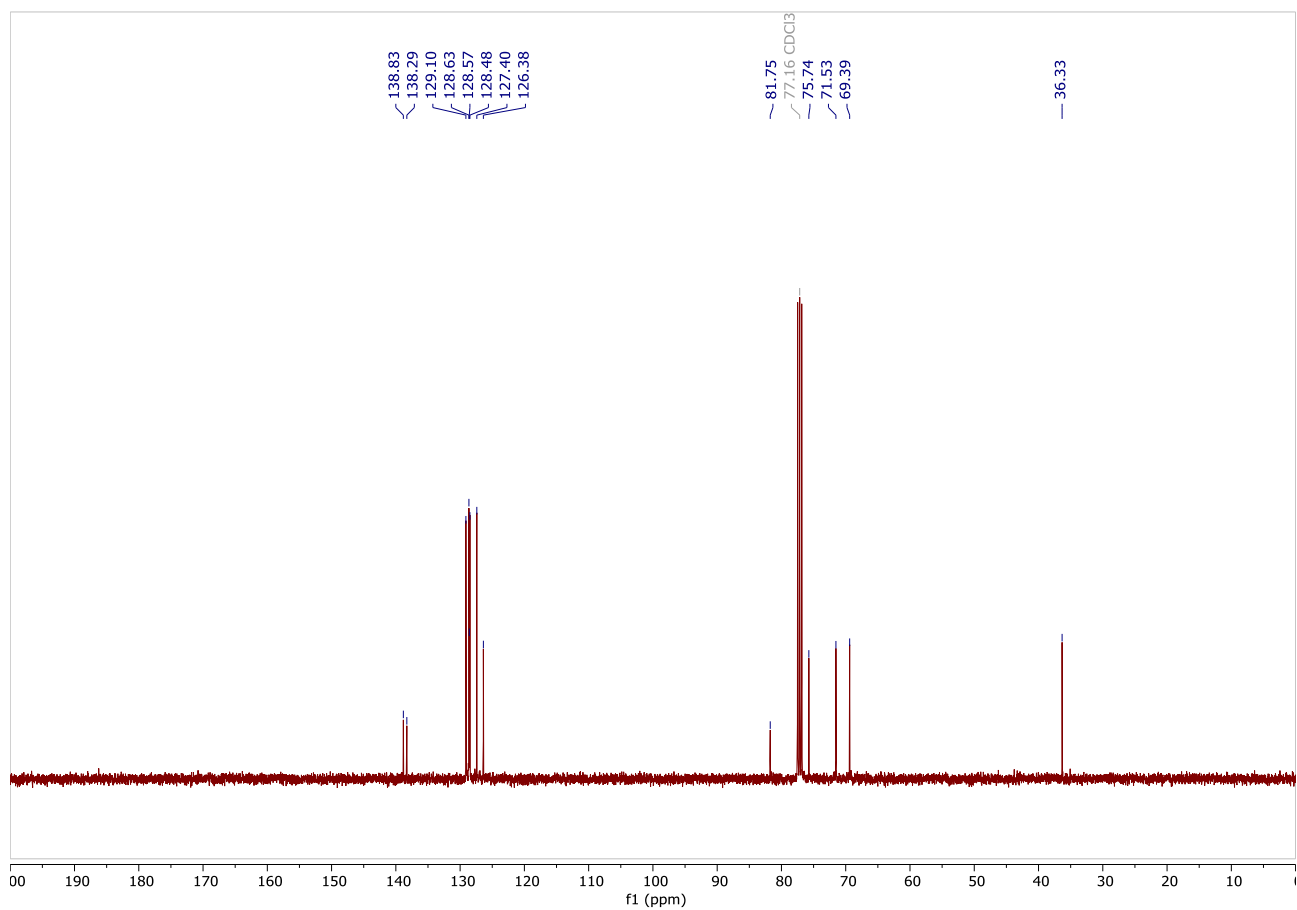

<sup>1</sup>H NMR (400 MHz, CDCl<sub>3</sub>)

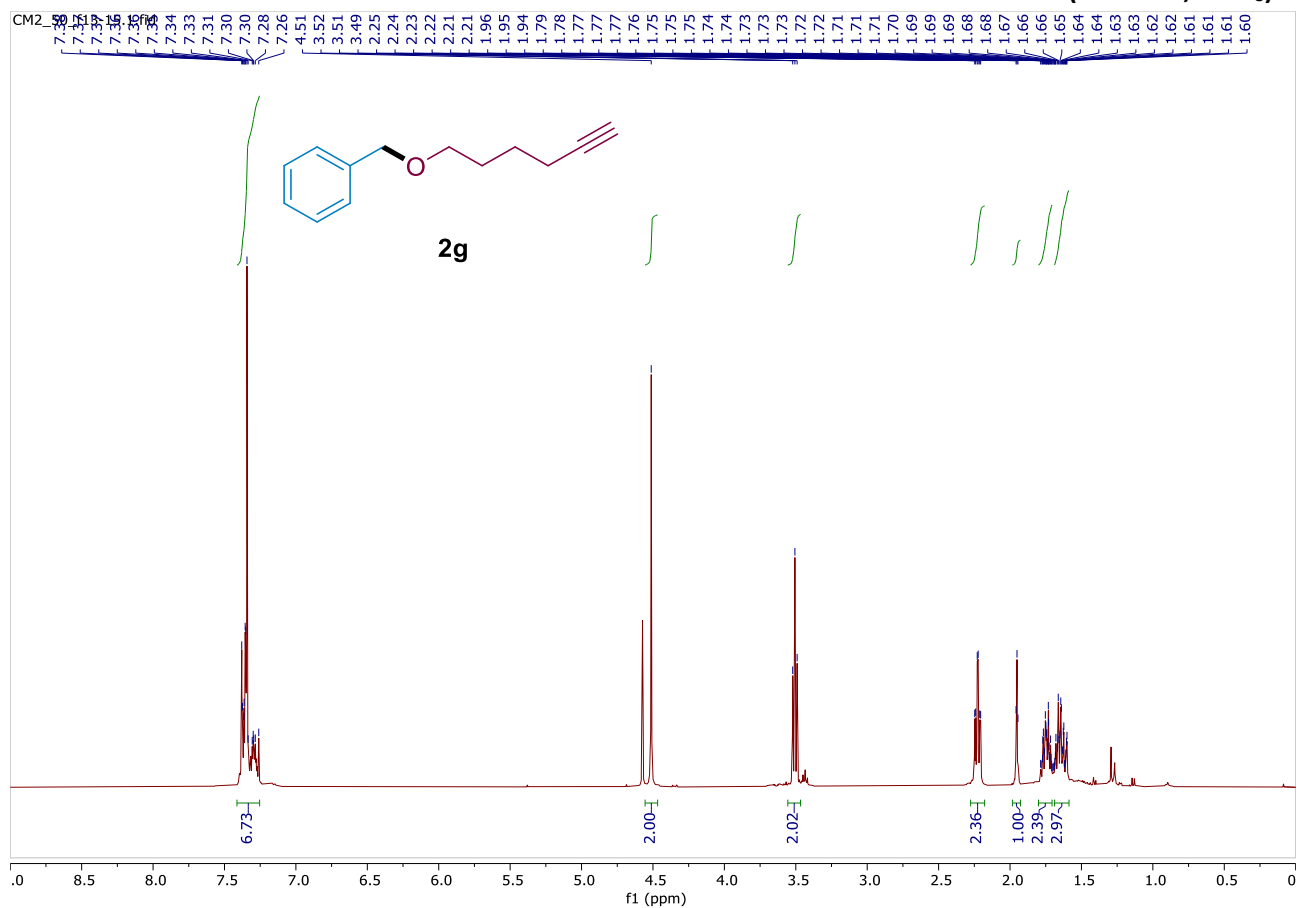

<sup>13</sup>C NMR (100 MHz, CDCl<sub>3</sub>)

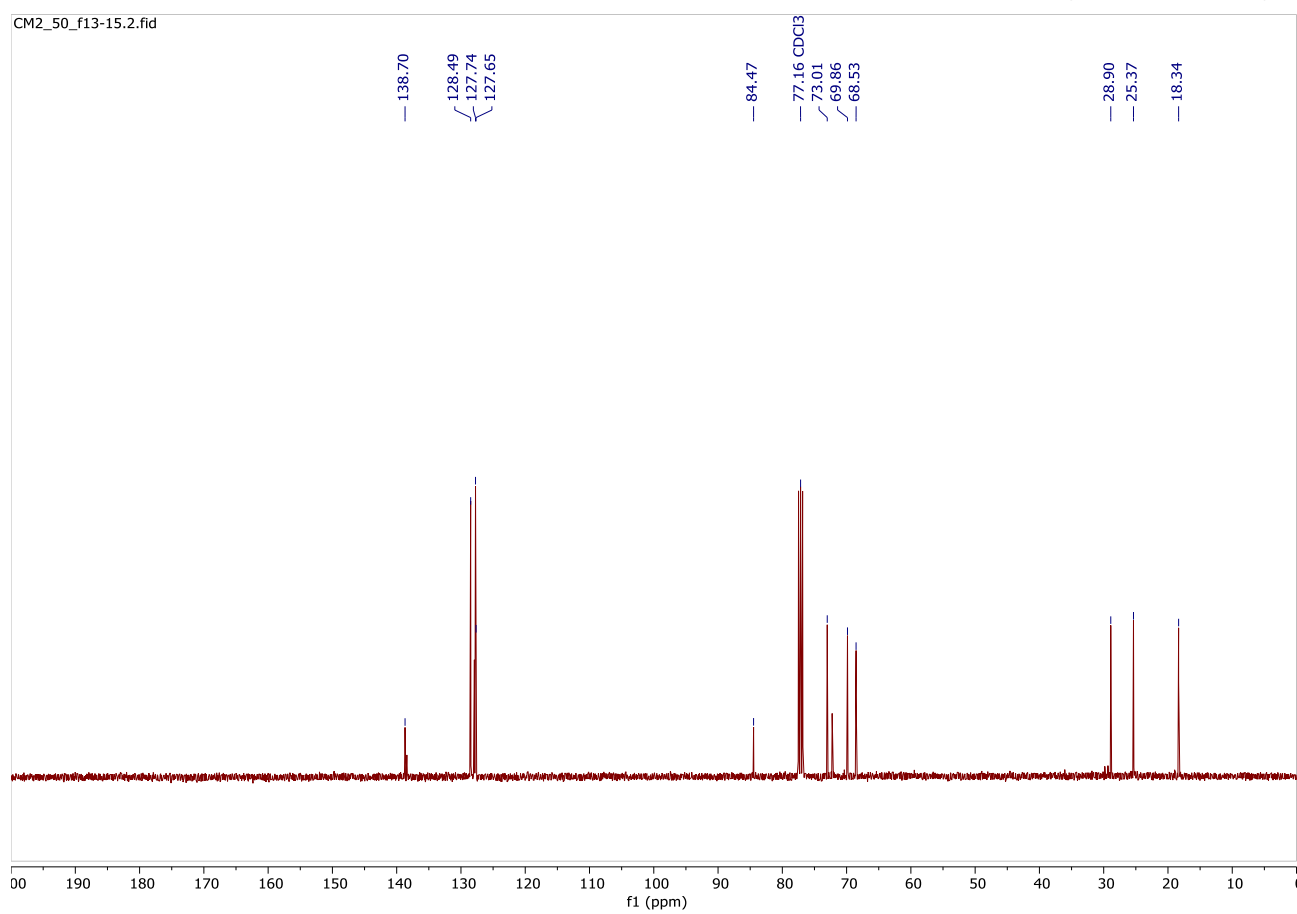

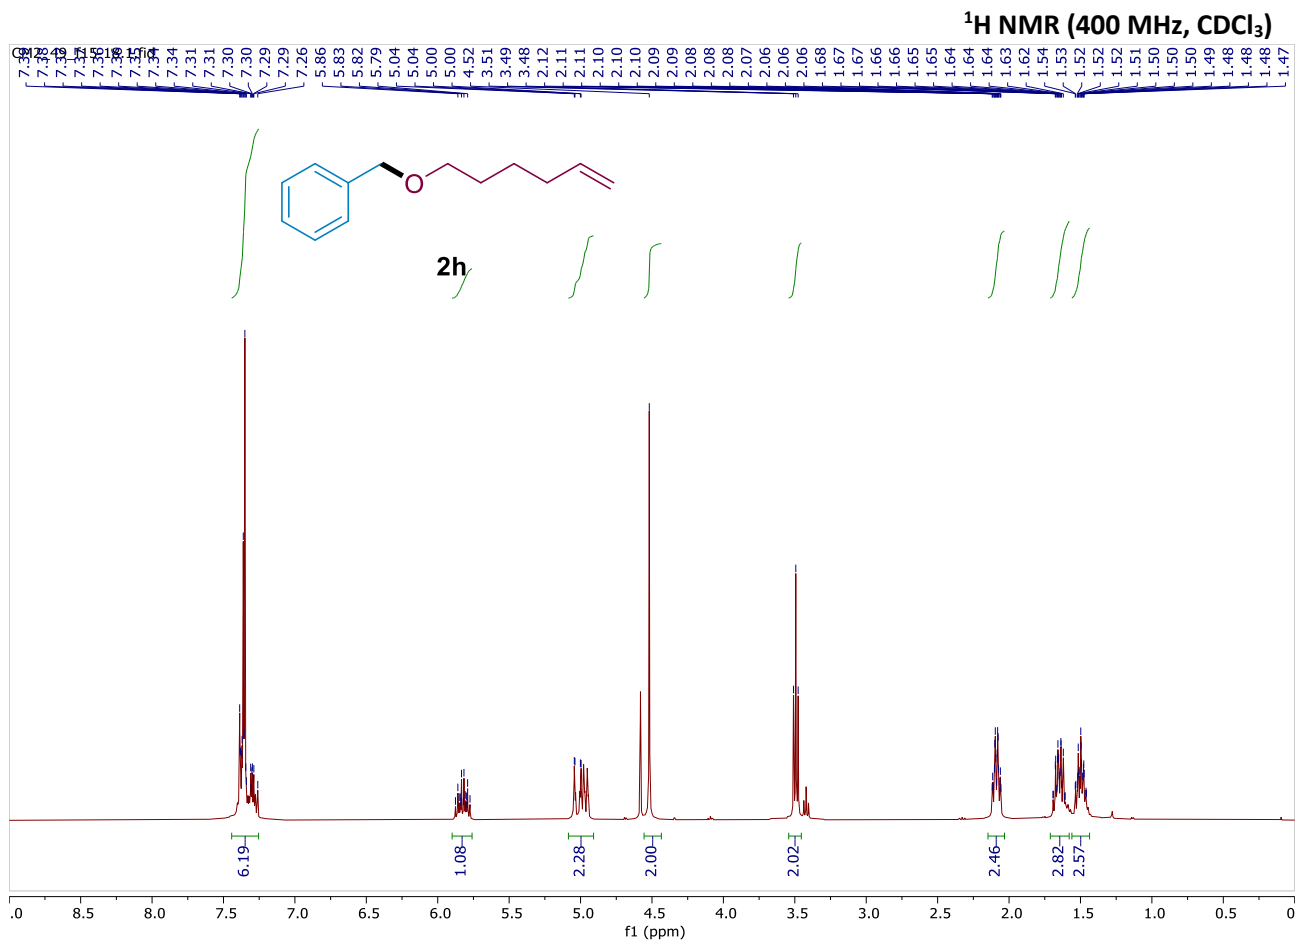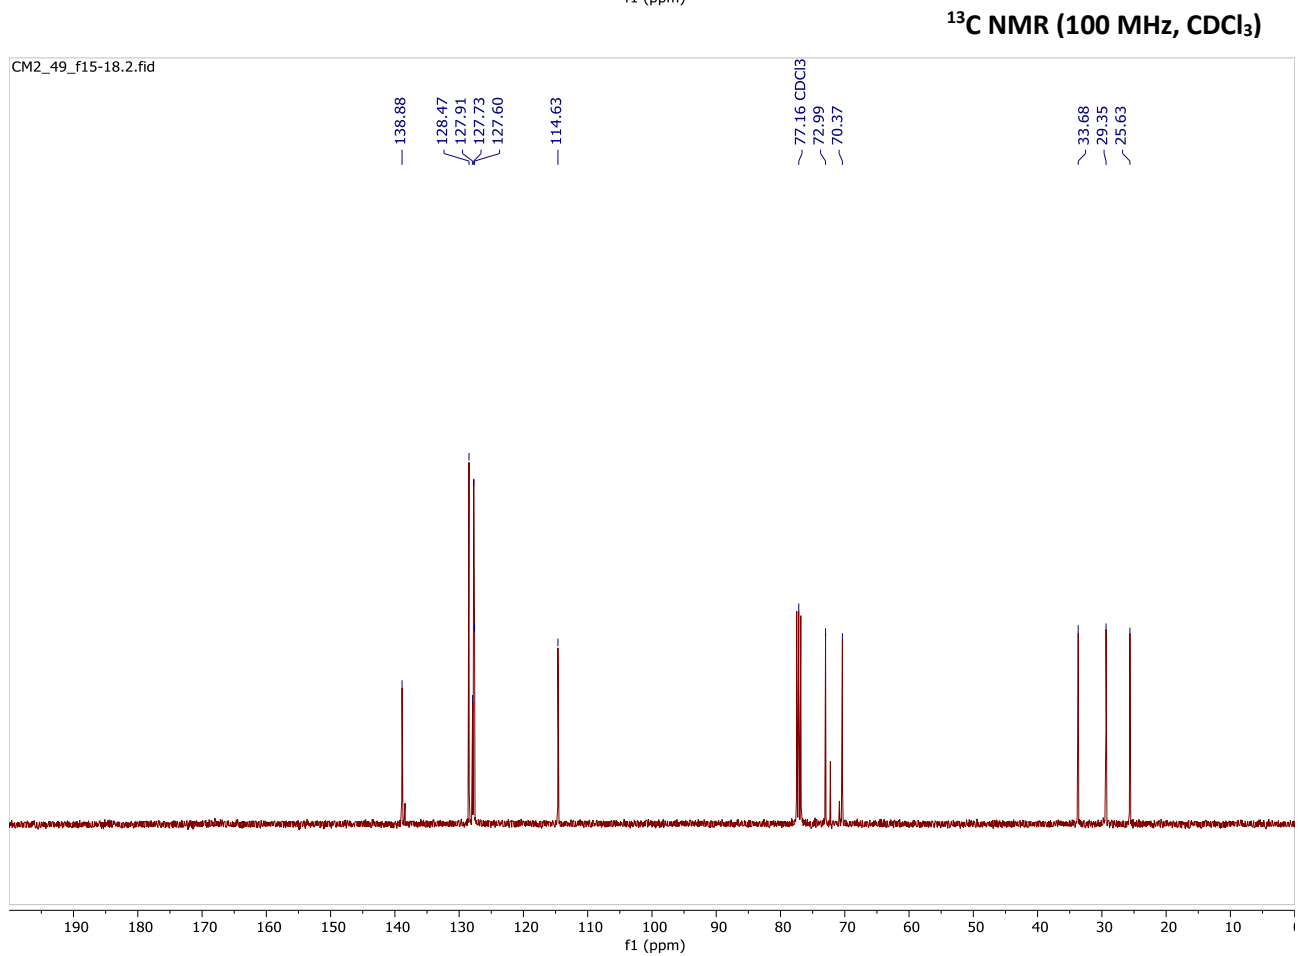

<sup>1</sup>H NMR (400 MHz, CDCl<sub>3</sub>)

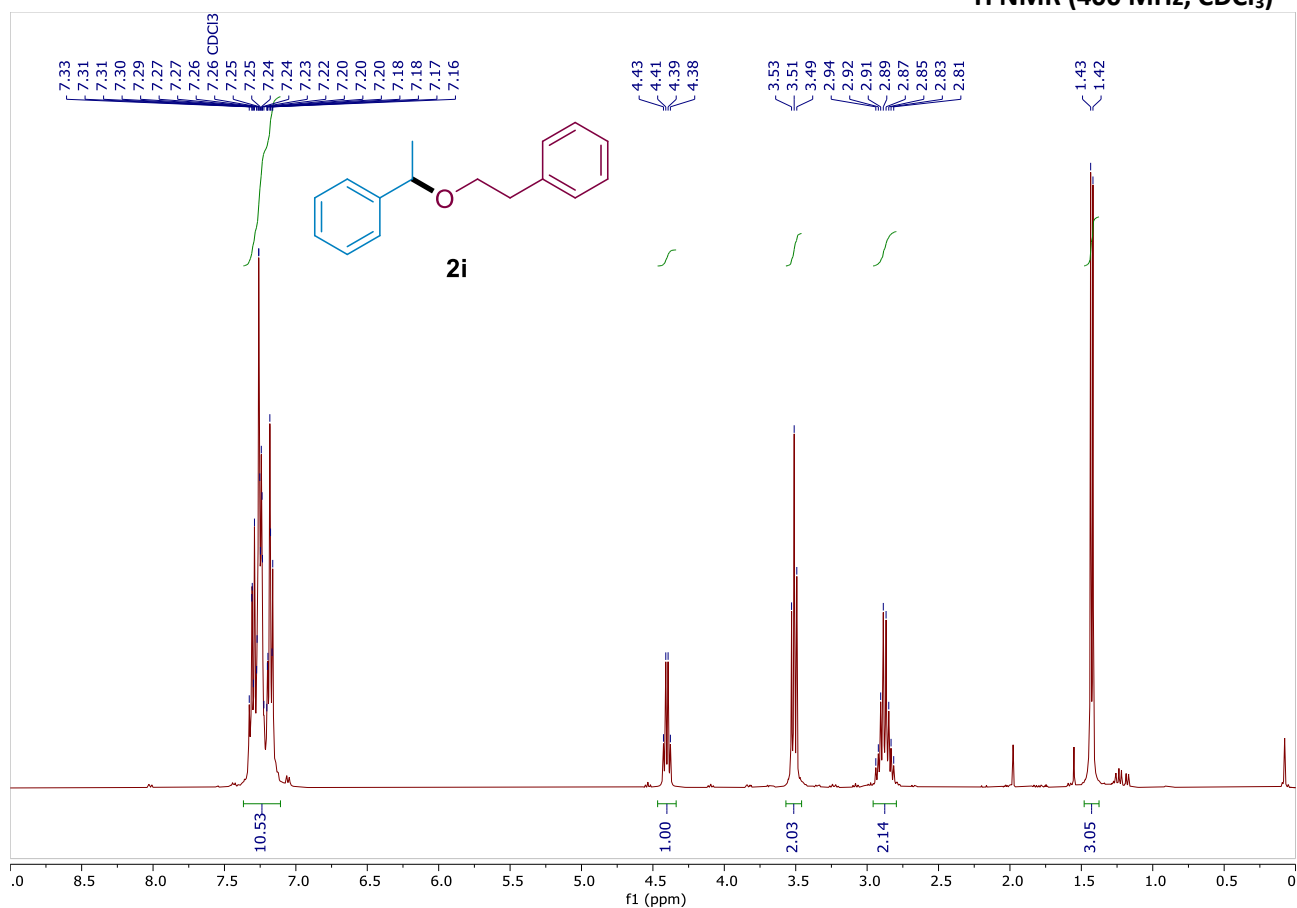

<sup>13</sup>C NMR (125 MHz, CDCl<sub>3</sub>)

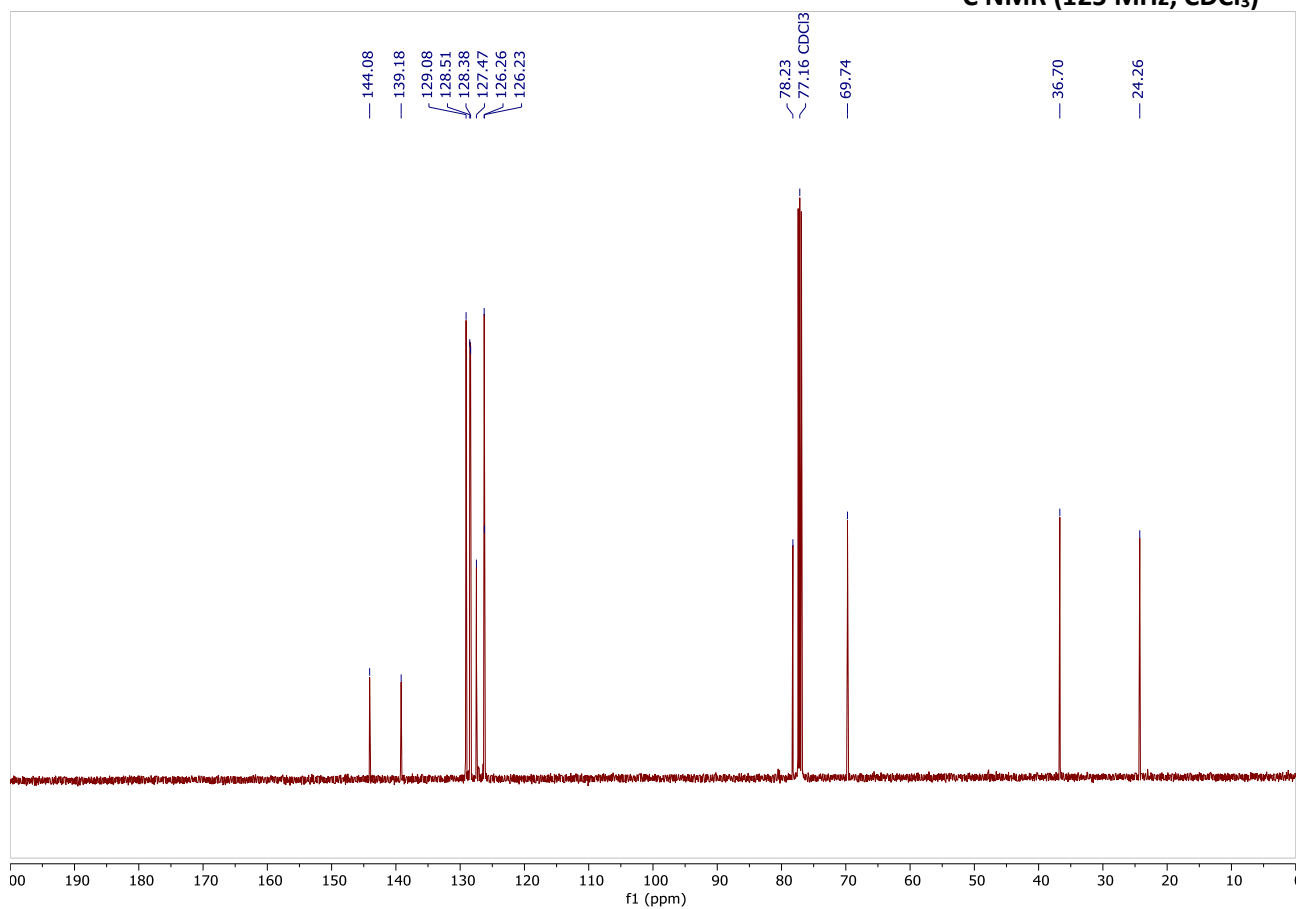

<sup>1</sup>H NMR (400 MHz, CDCl<sub>3</sub>)

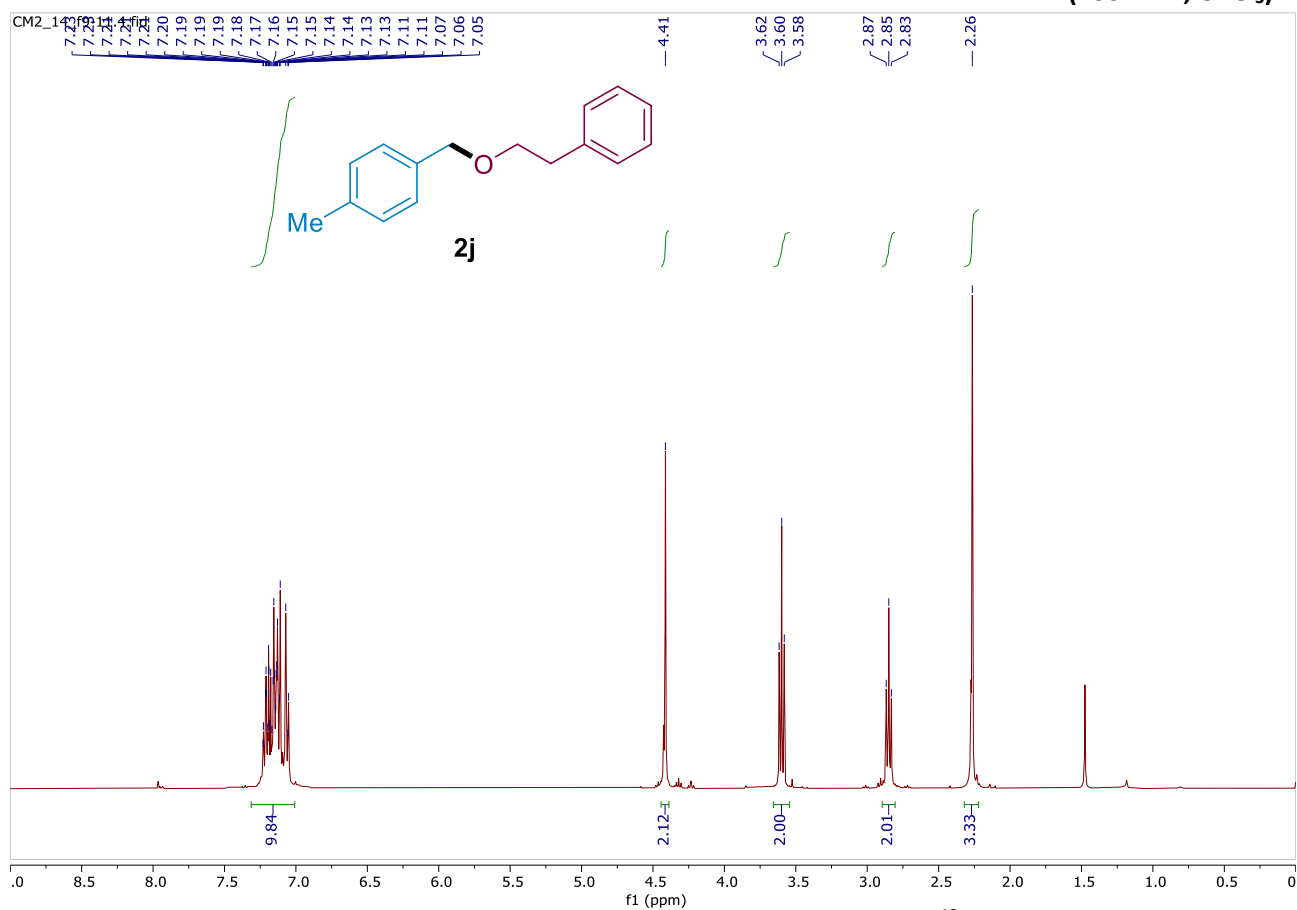

<sup>13</sup>C NMR (100 MHz, CDCl<sub>3</sub>)

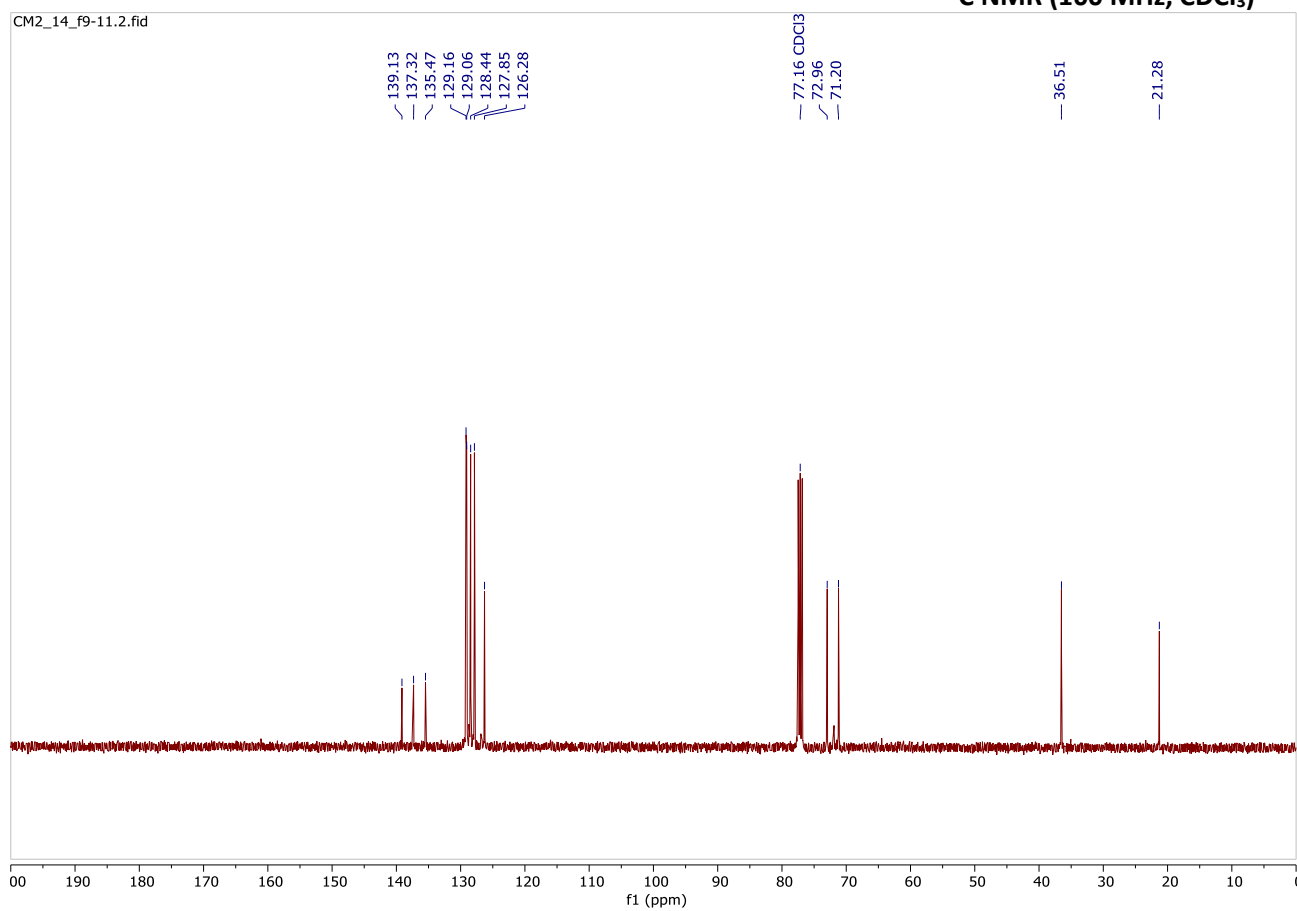

**<sup>1</sup>H NMR (400 MHz, CDCl<sub>3</sub>)**

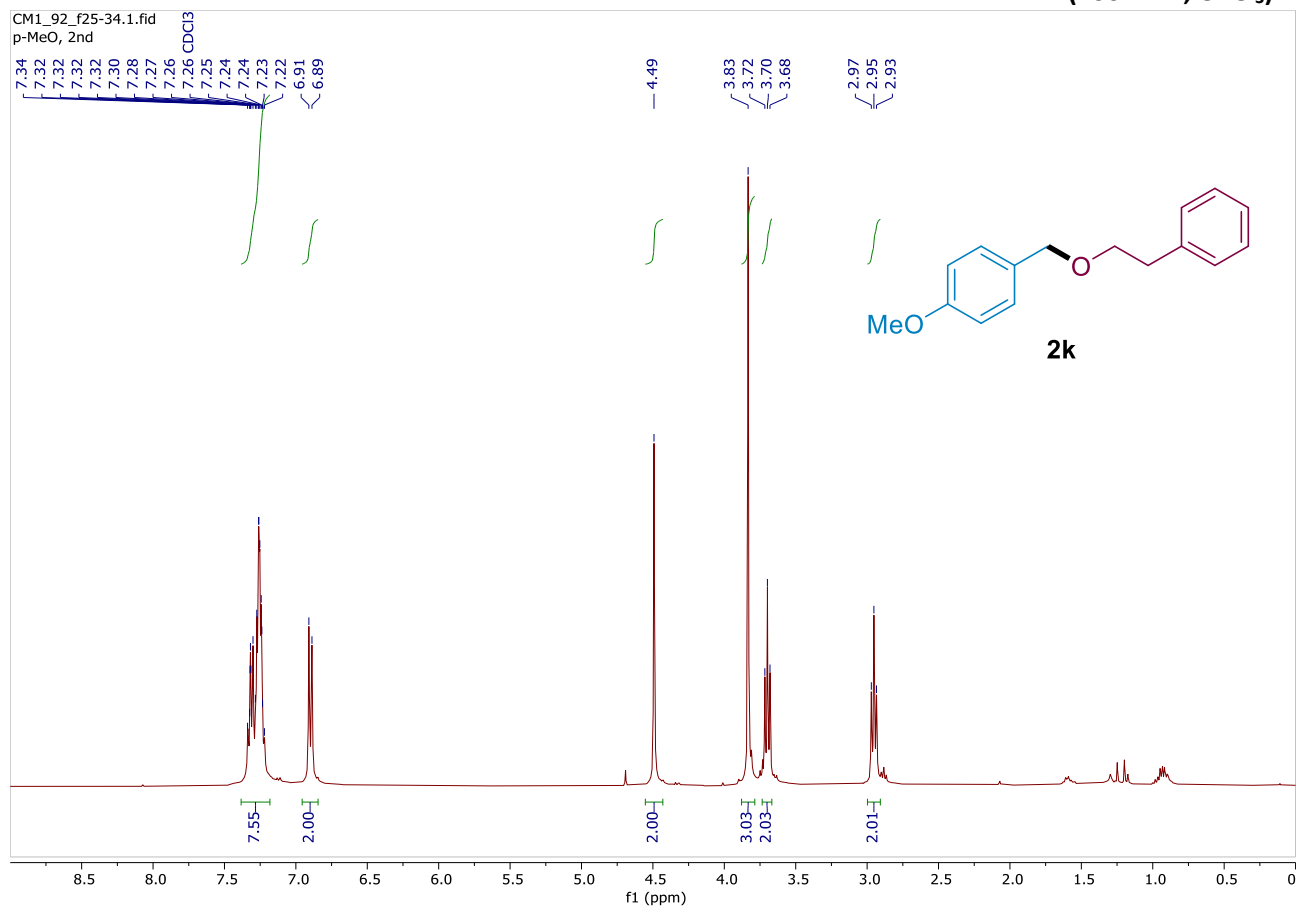

**<sup>13</sup>C NMR (125 MHz, CDCl<sub>3</sub>)**

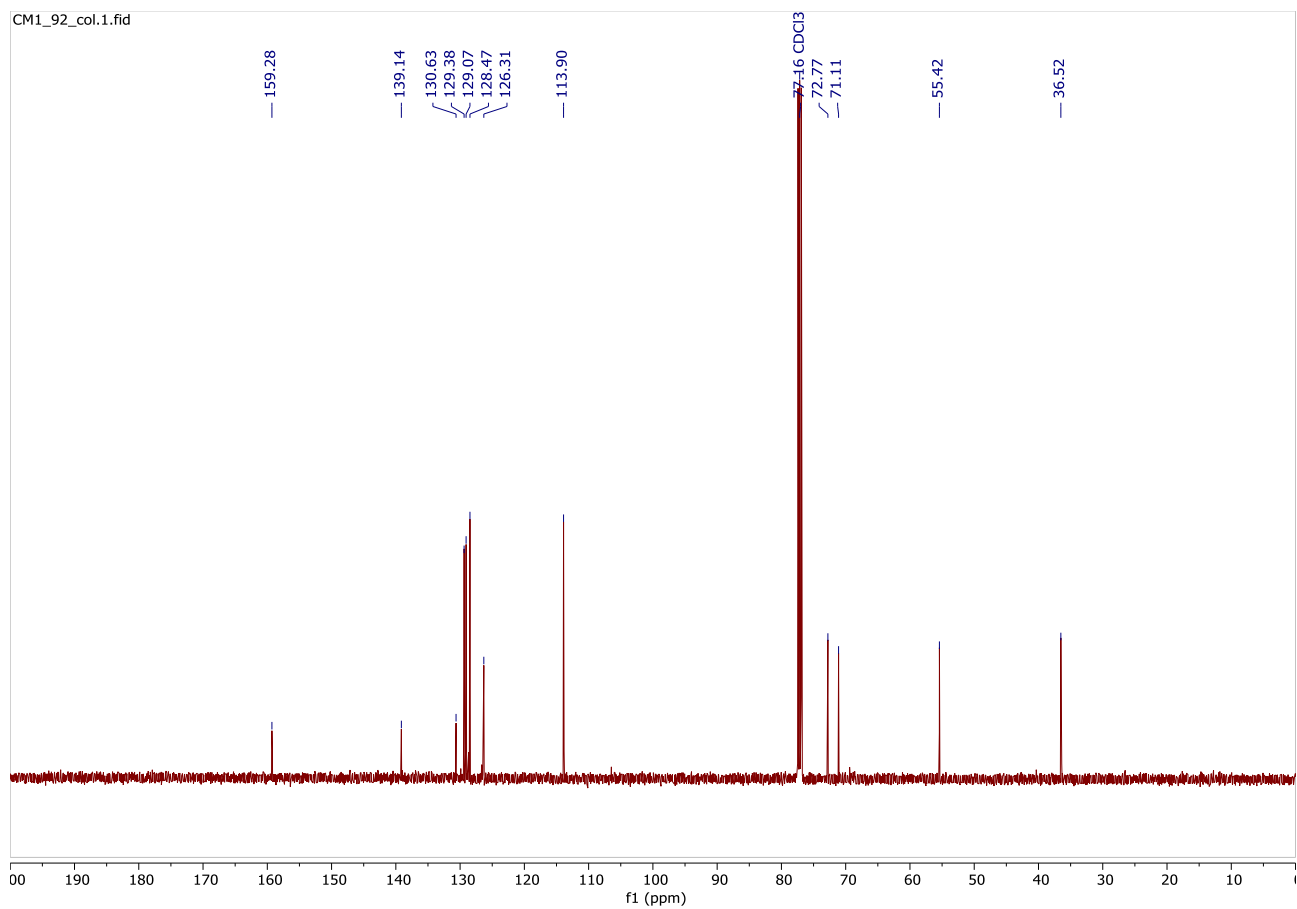

<sup>1</sup>H NMR (400 MHz, CDCl<sub>3</sub>)

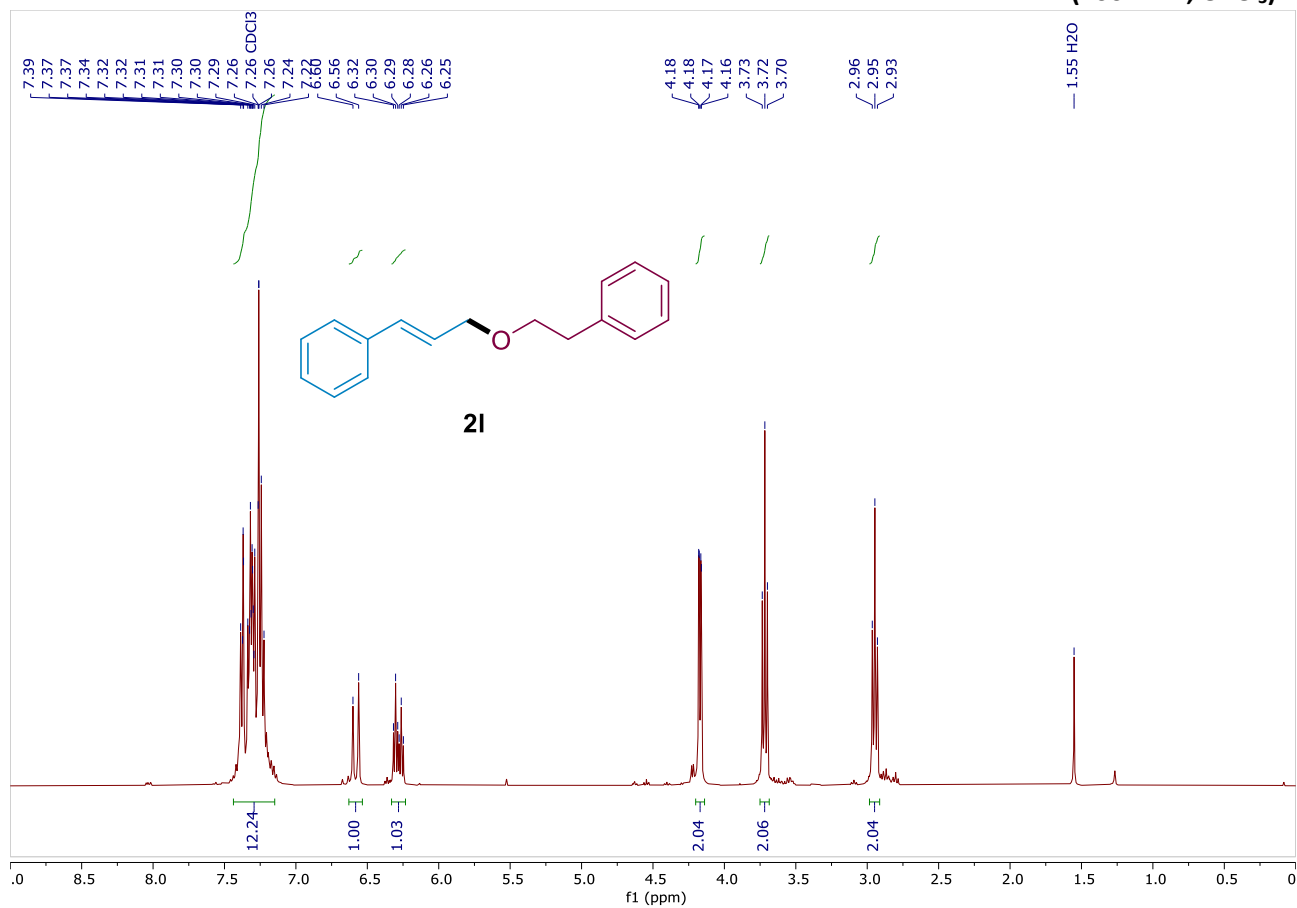

<sup>13</sup>C NMR (125 MHz, CDCl<sub>3</sub>)

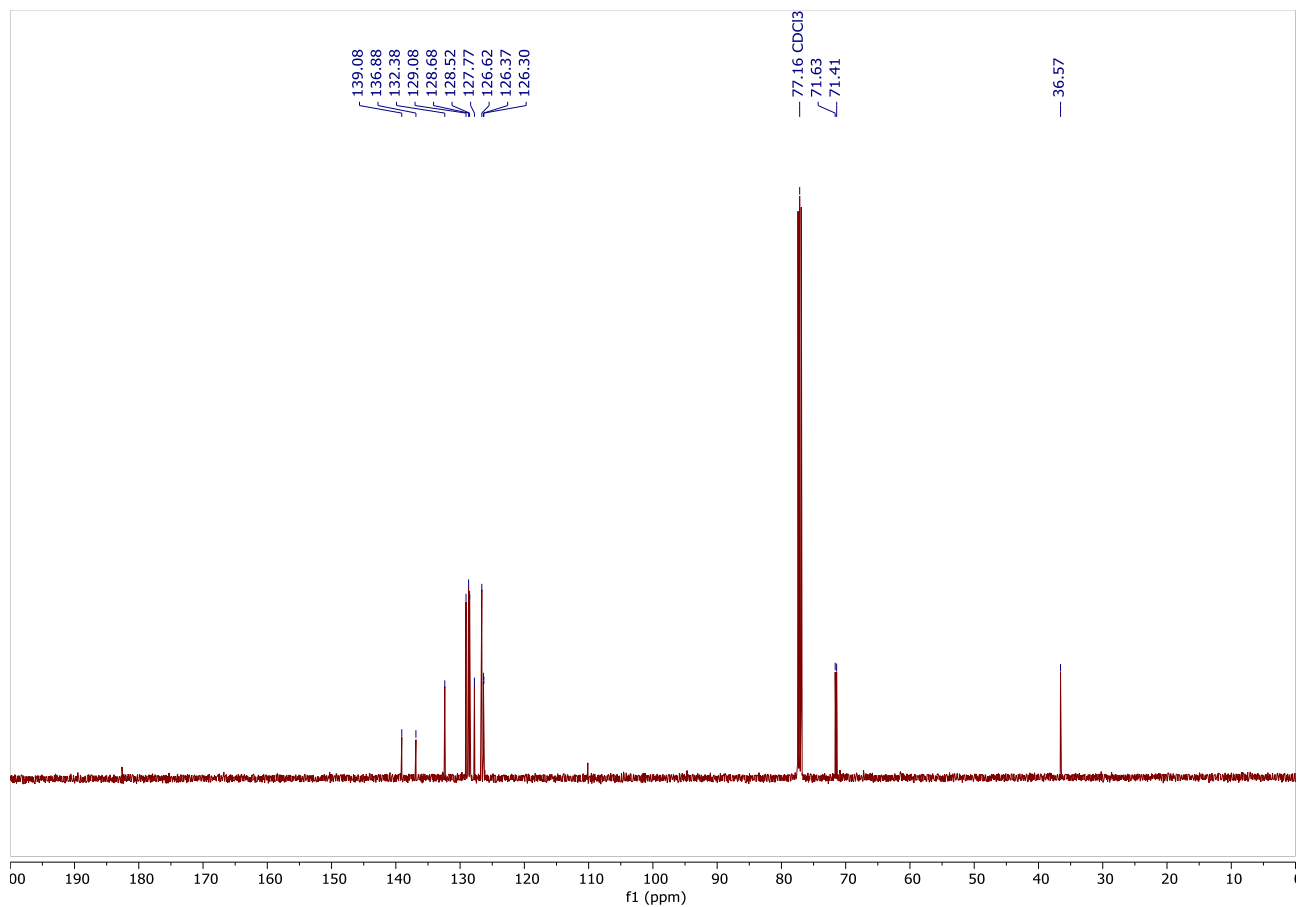

<sup>1</sup>H NMR (400 MHz, CDCl<sub>3</sub>)

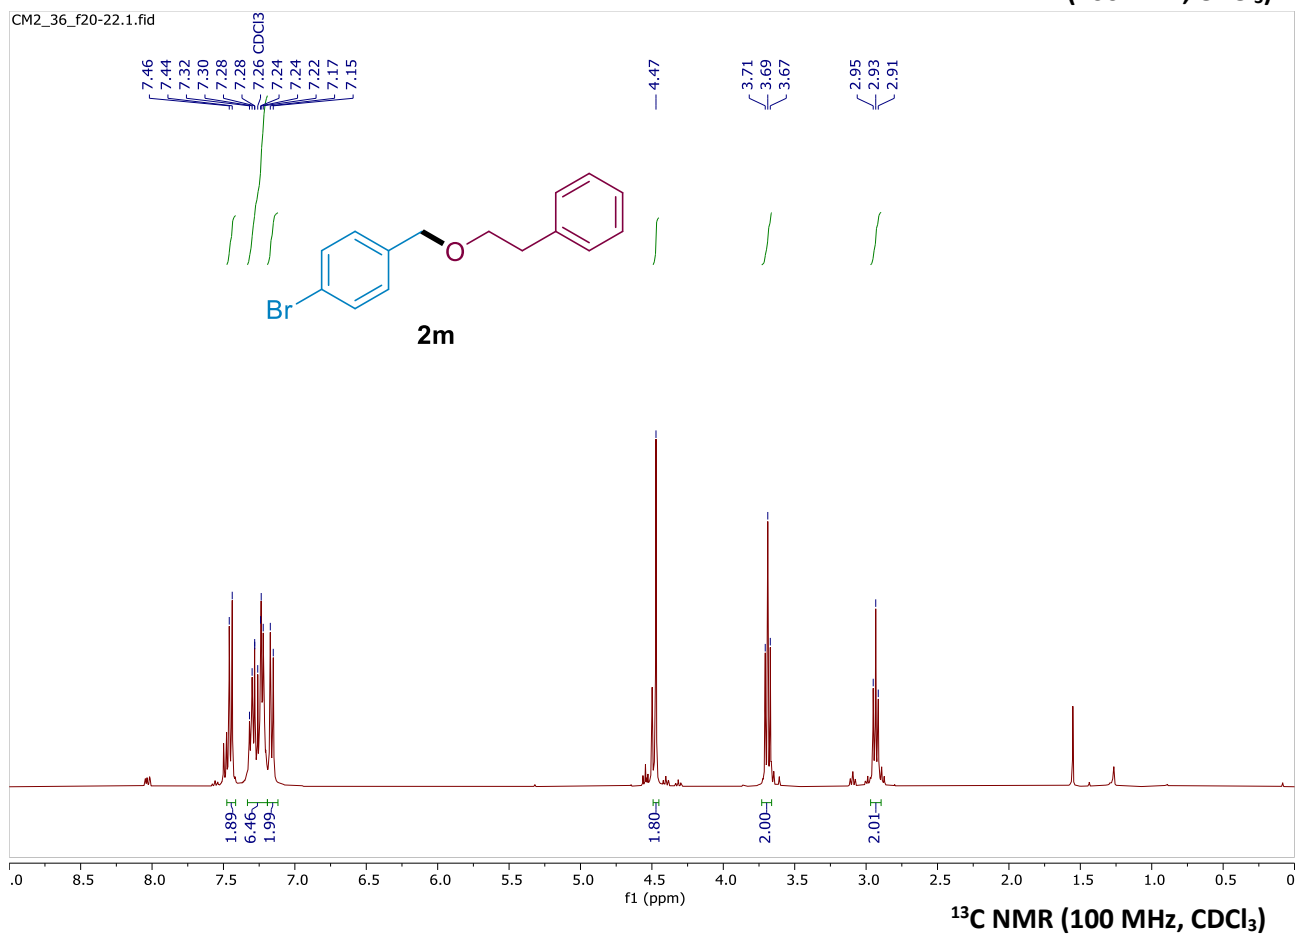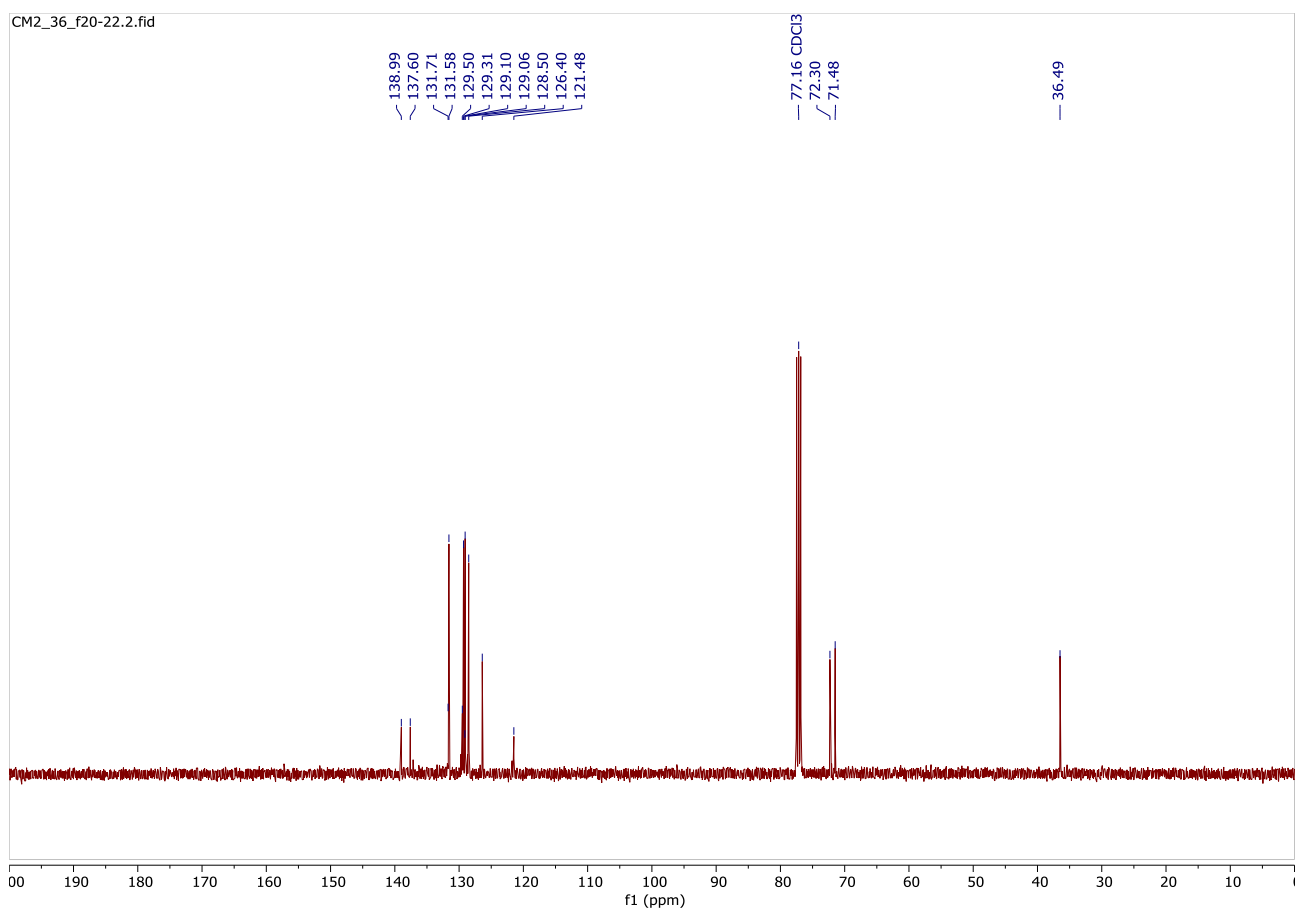

<sup>1</sup>H NMR (400 MHz, CDCl<sub>3</sub>)

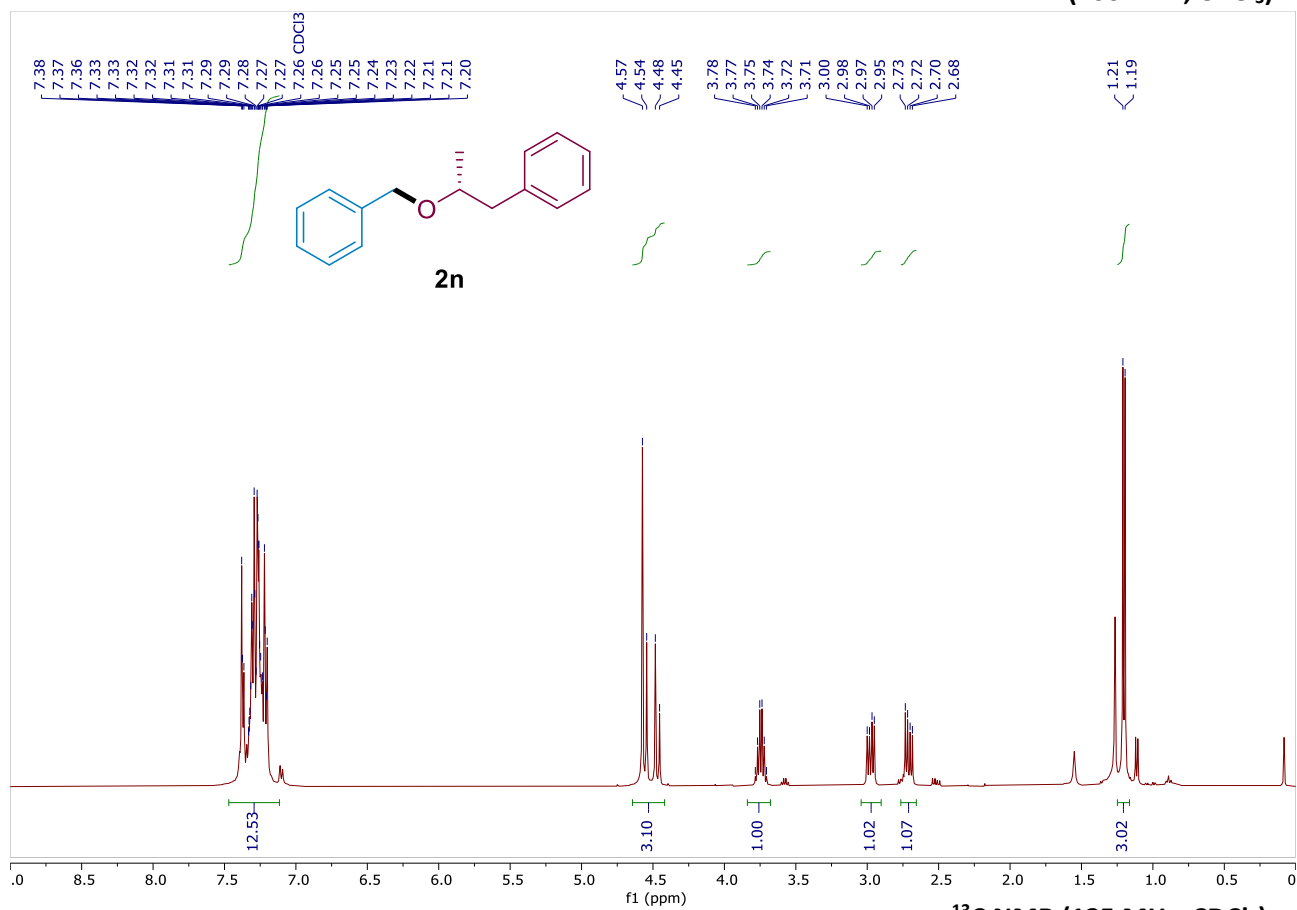

<sup>13</sup>C NMR (125 MHz, CDCl<sub>3</sub>)

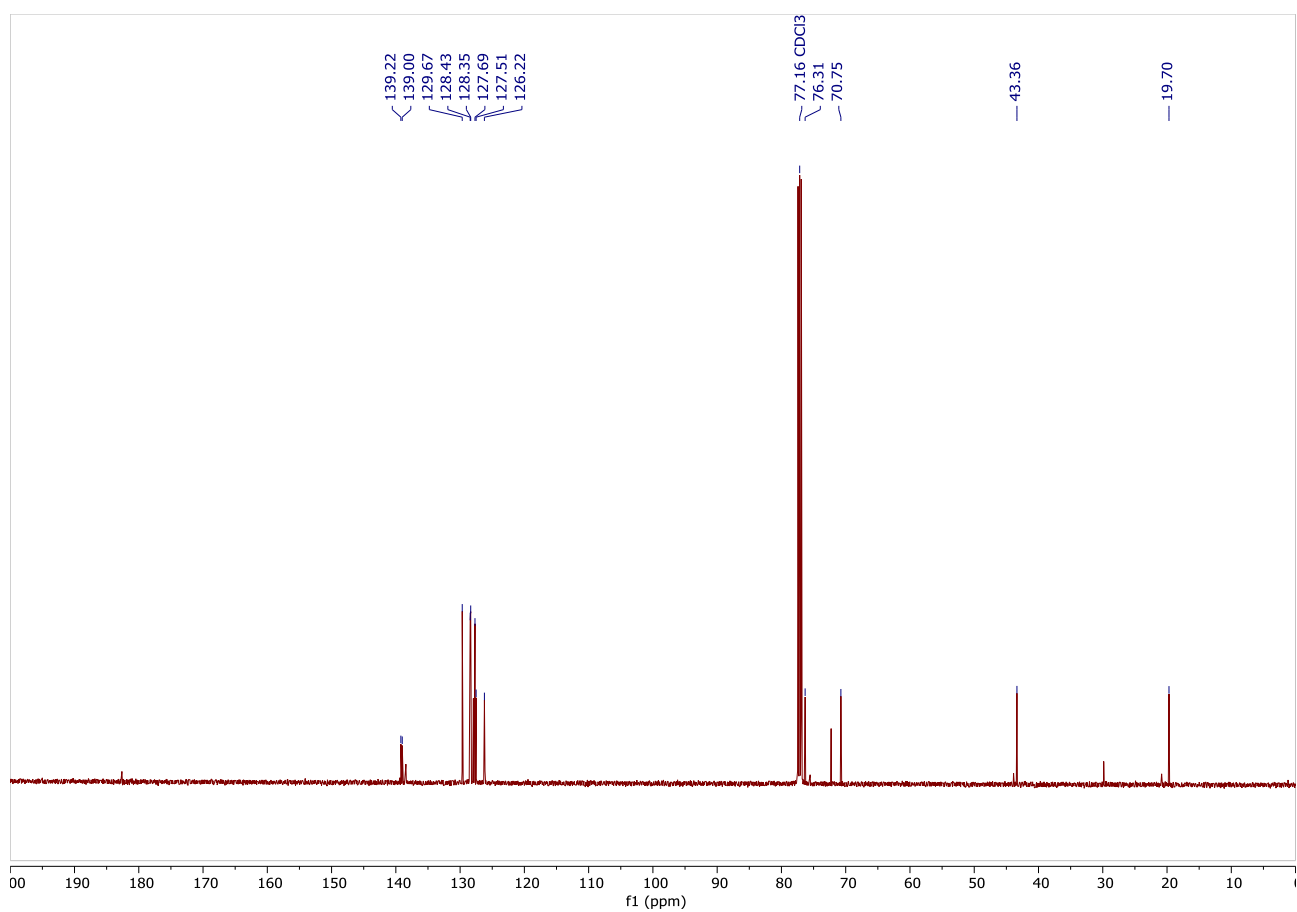

<sup>1</sup>H NMR (500 MHz, CDCl<sub>3</sub>)

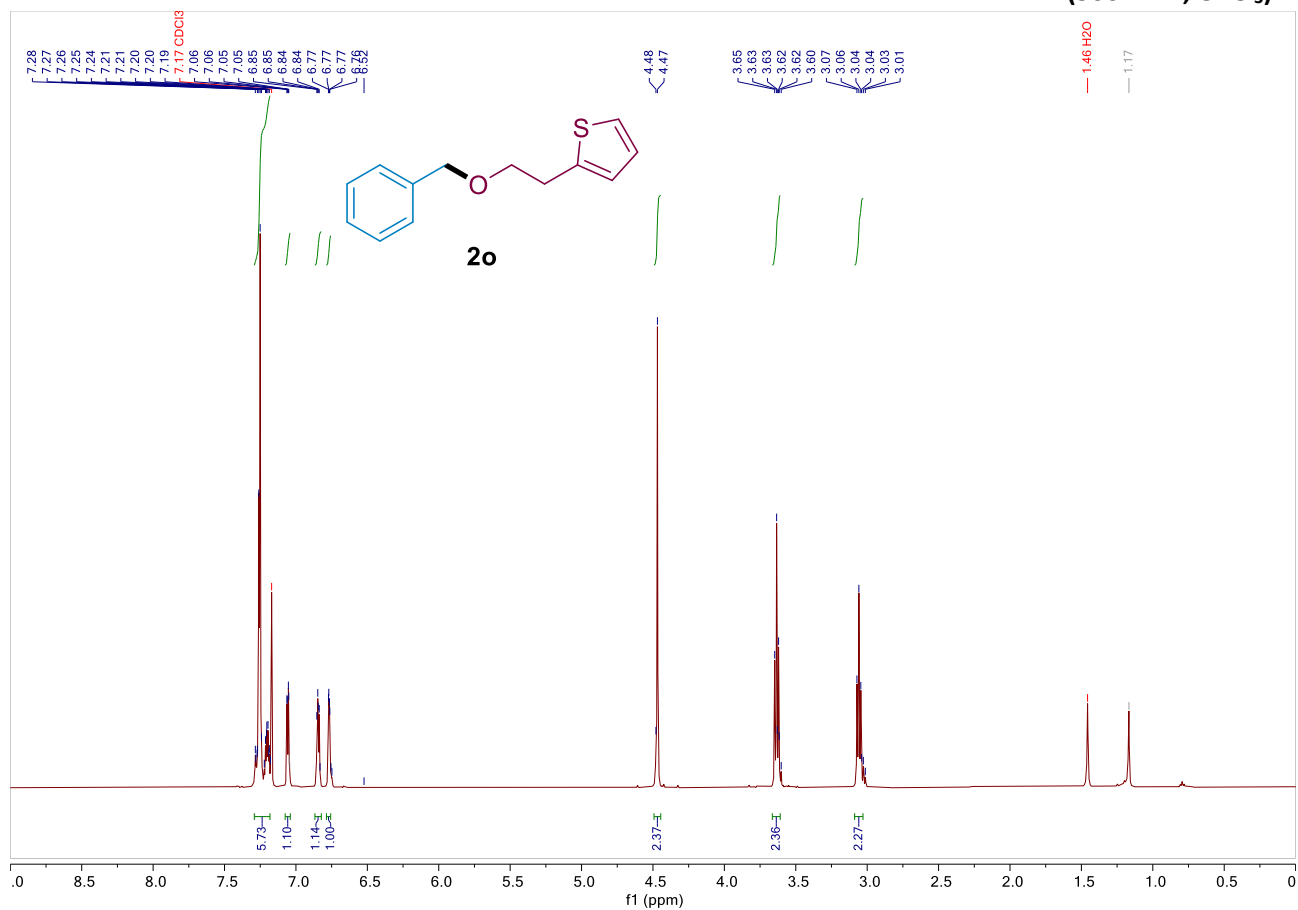

<sup>13</sup>C NMR (125 MHz, CDCl<sub>3</sub>)

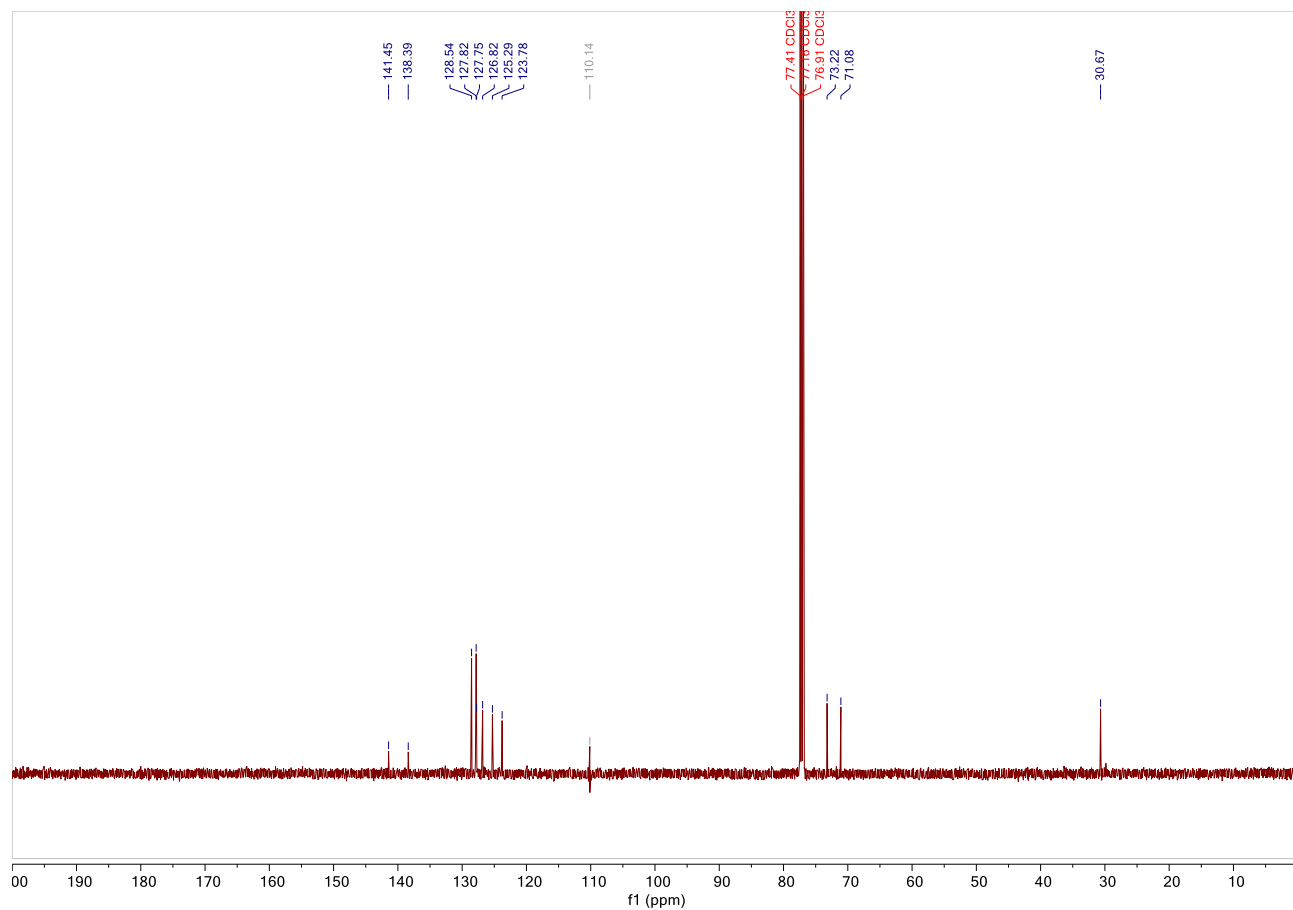

<sup>1</sup>H NMR (400 MHz, CDCl<sub>3</sub>)

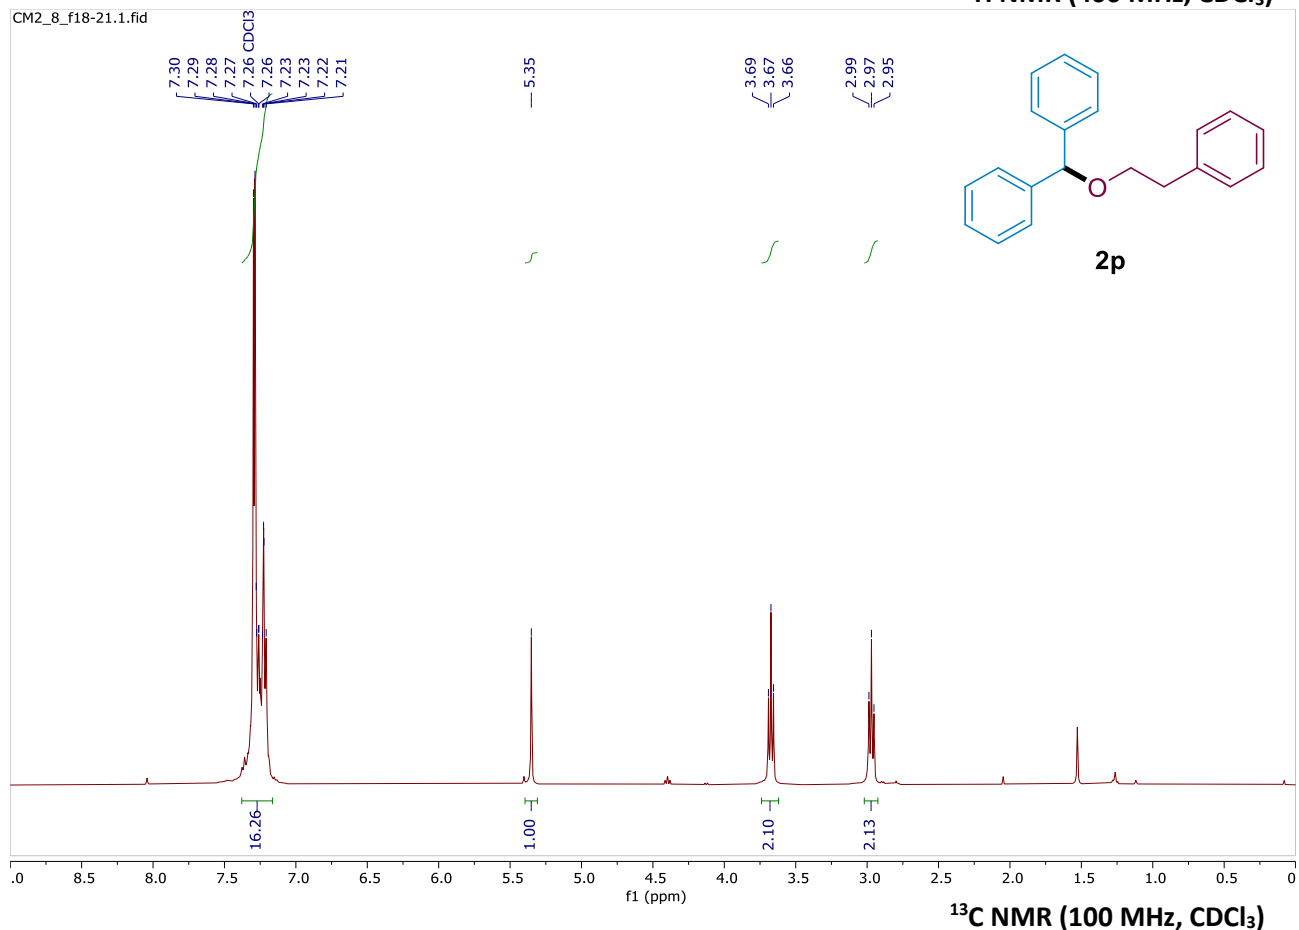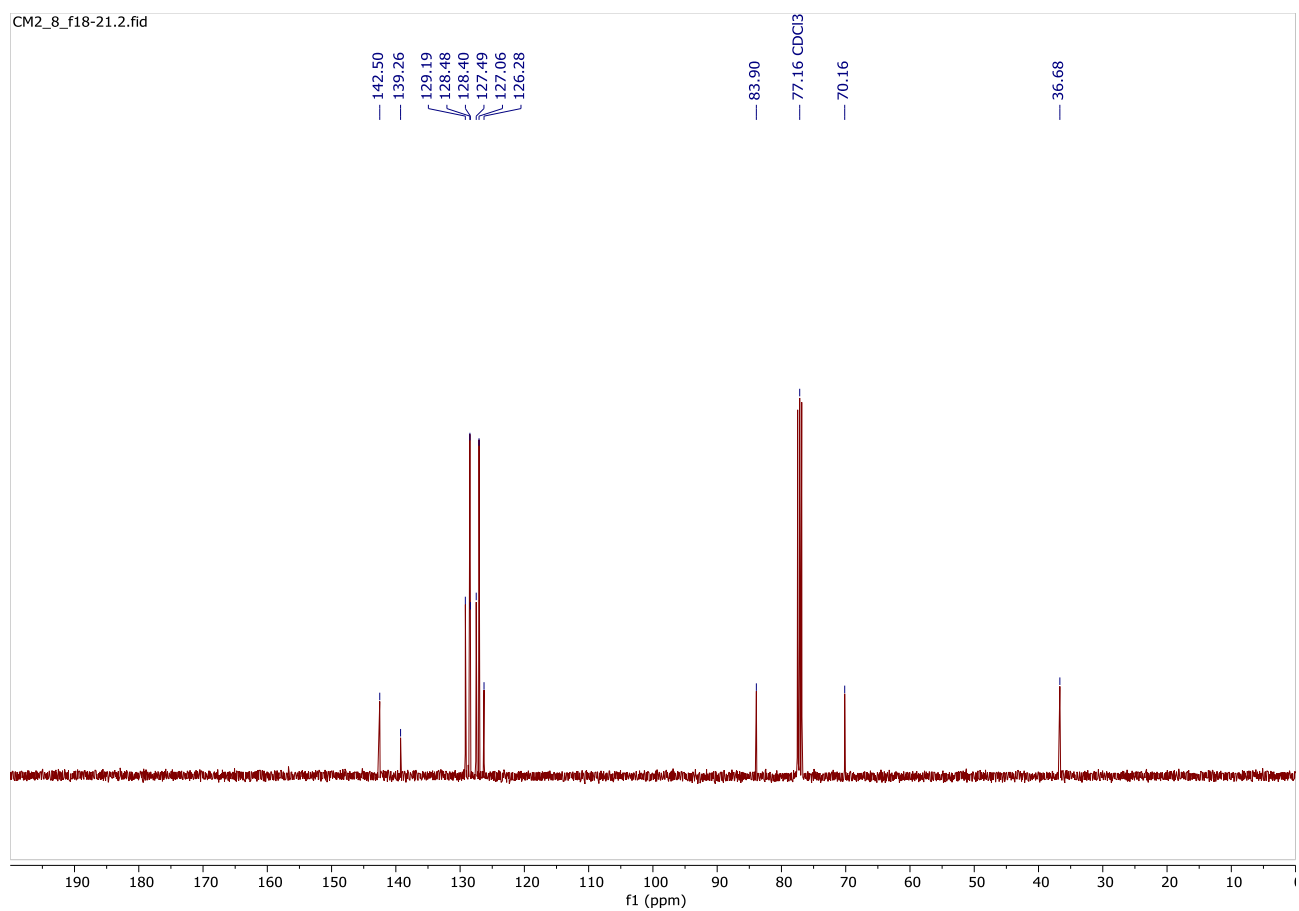

<sup>1</sup>H NMR (400 MHz, CDCl<sub>3</sub>)

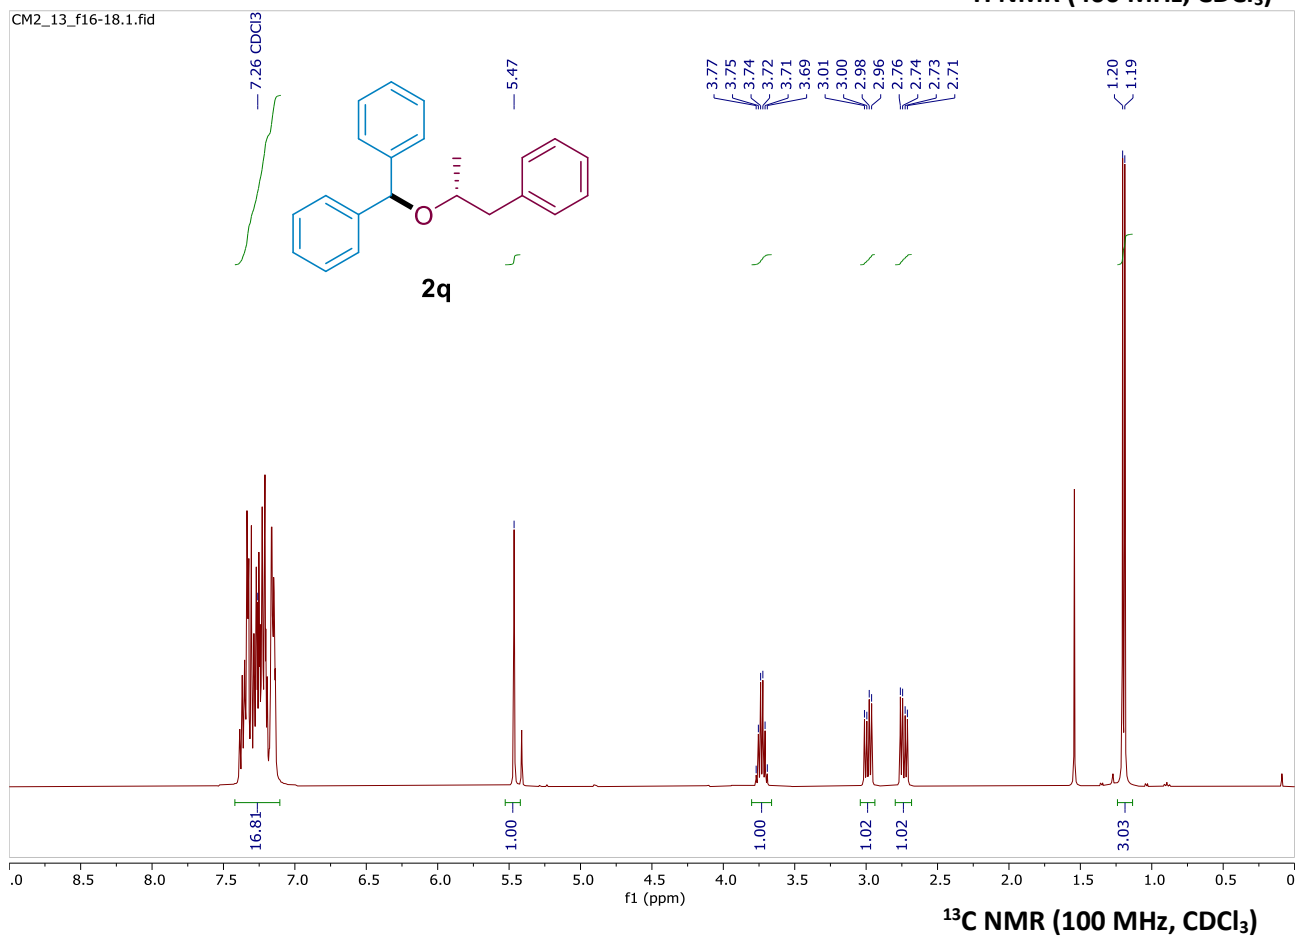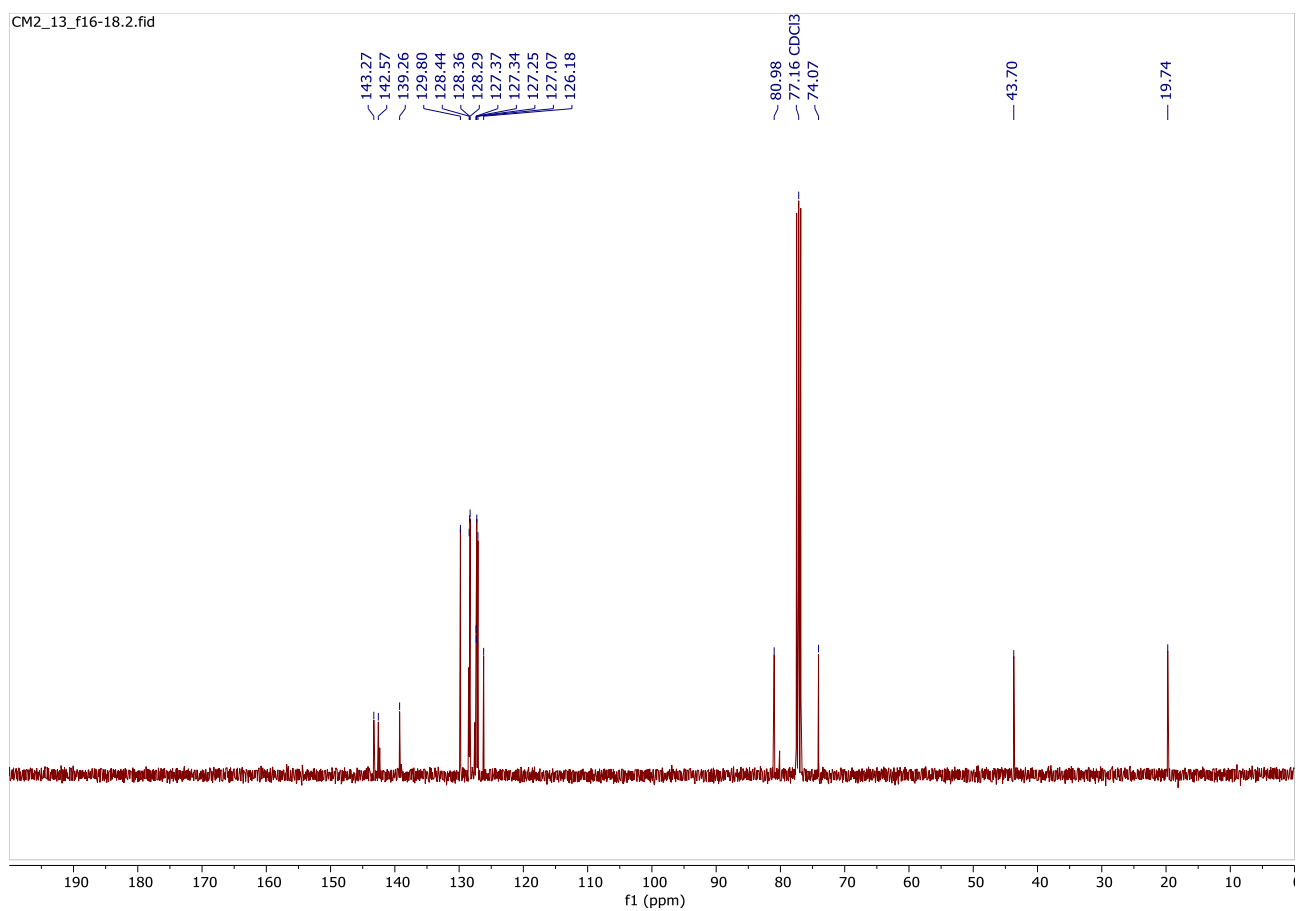

**<sup>1</sup>H NMR (400 MHz, CDCl<sub>3</sub>)**

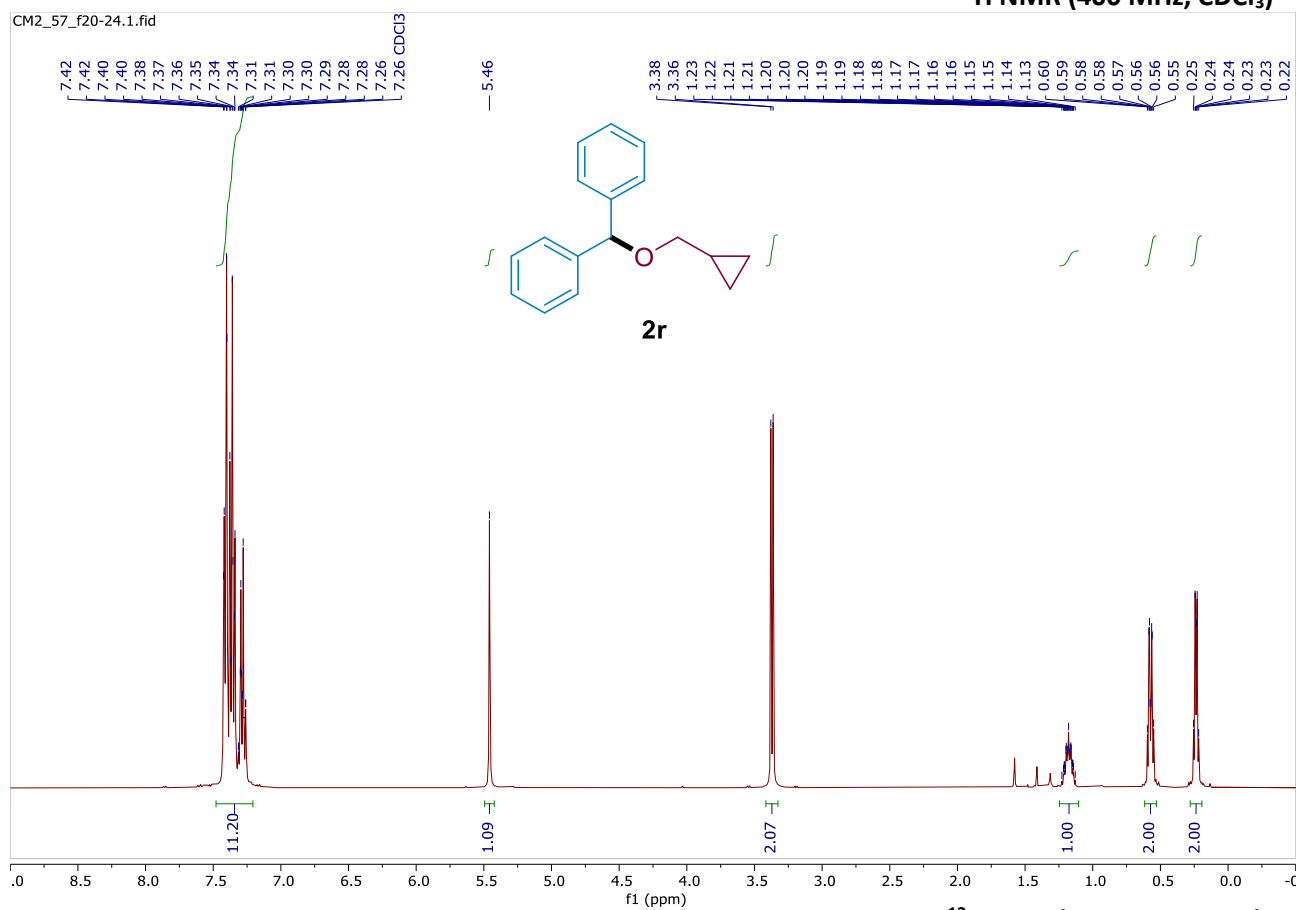

**<sup>13</sup>C NMR (100 MHz, CDCl<sub>3</sub>)**

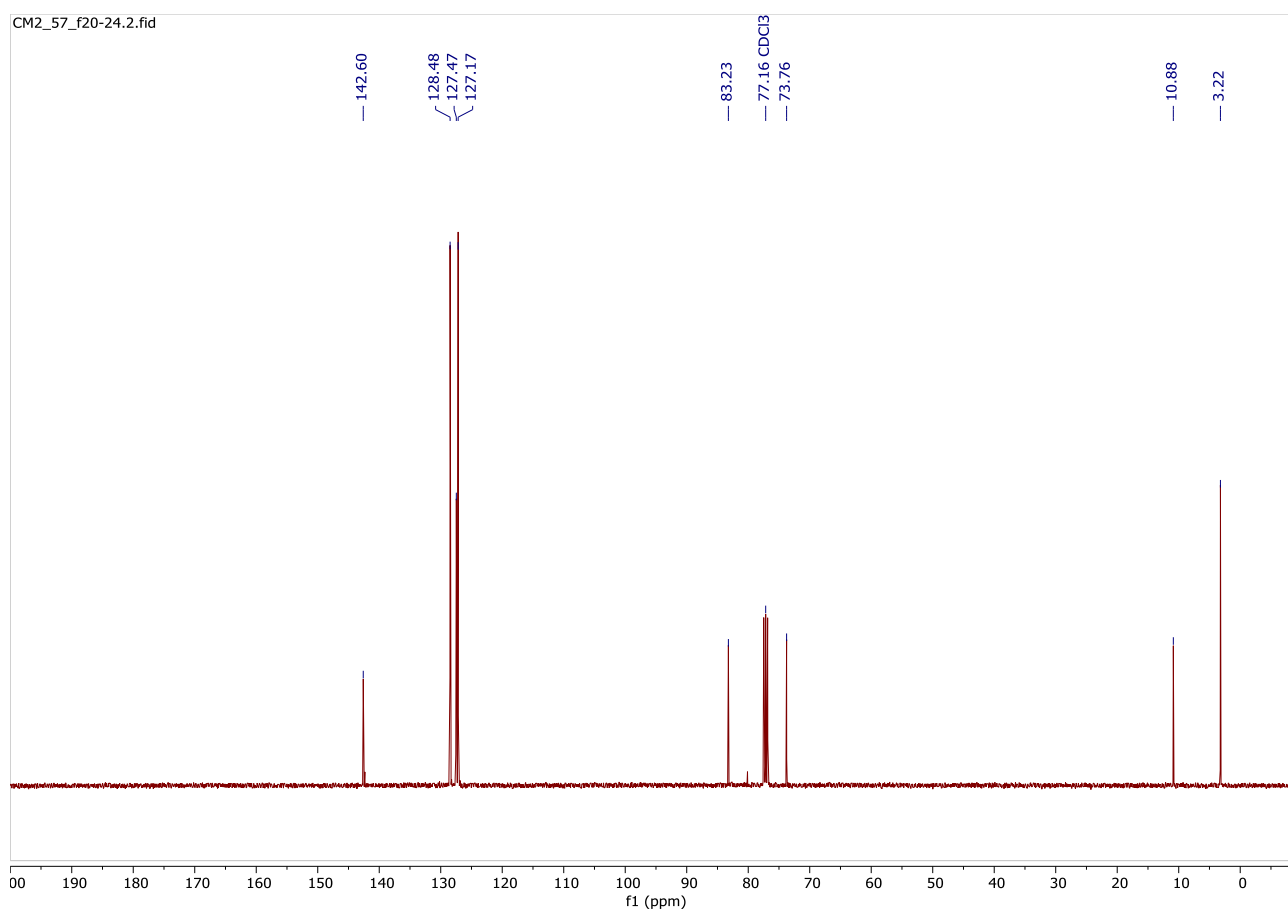

<sup>1</sup>H NMR (400 MHz, CDCl<sub>3</sub>)

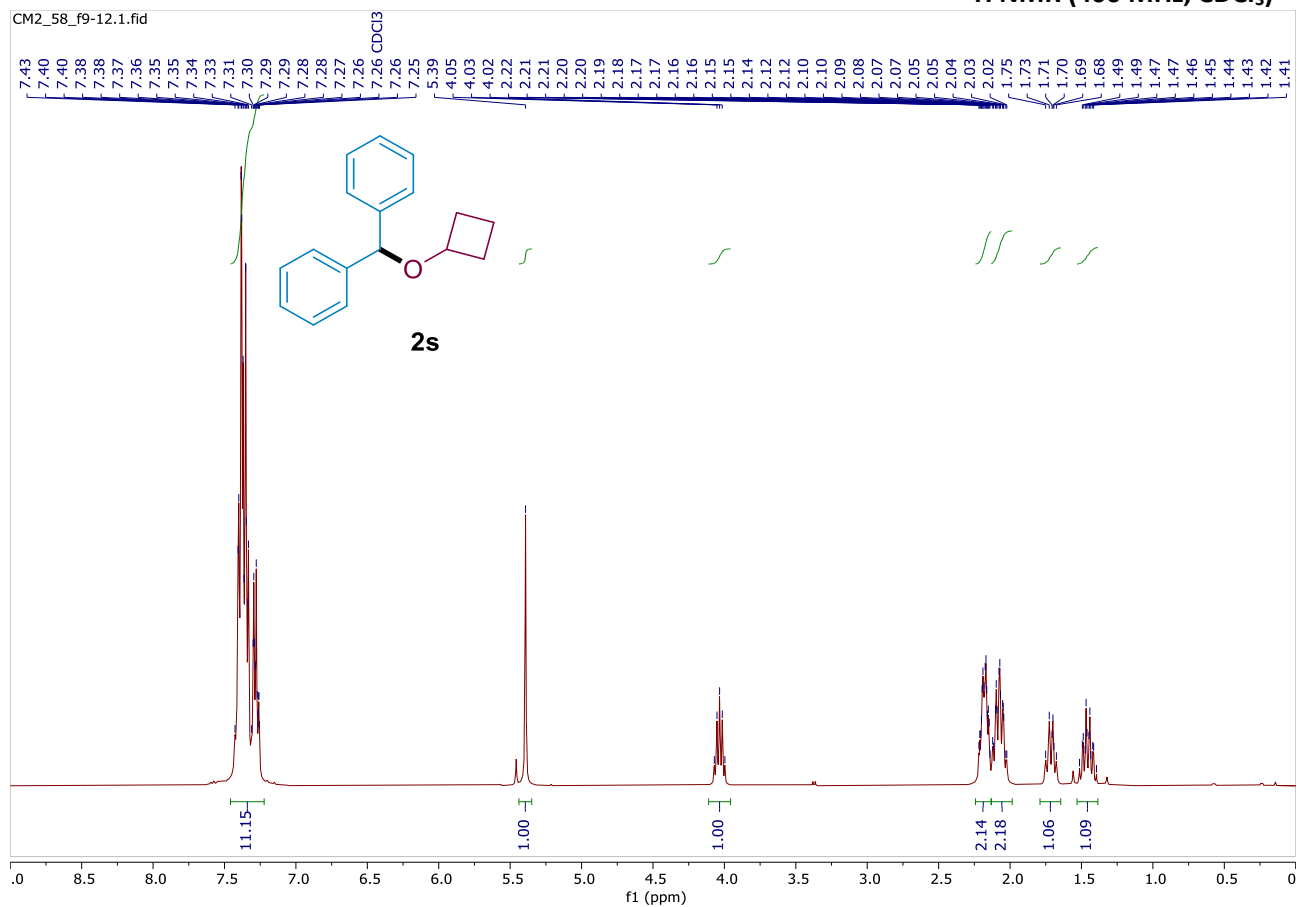

<sup>13</sup>C NMR (100 MHz, CDCl<sub>3</sub>)

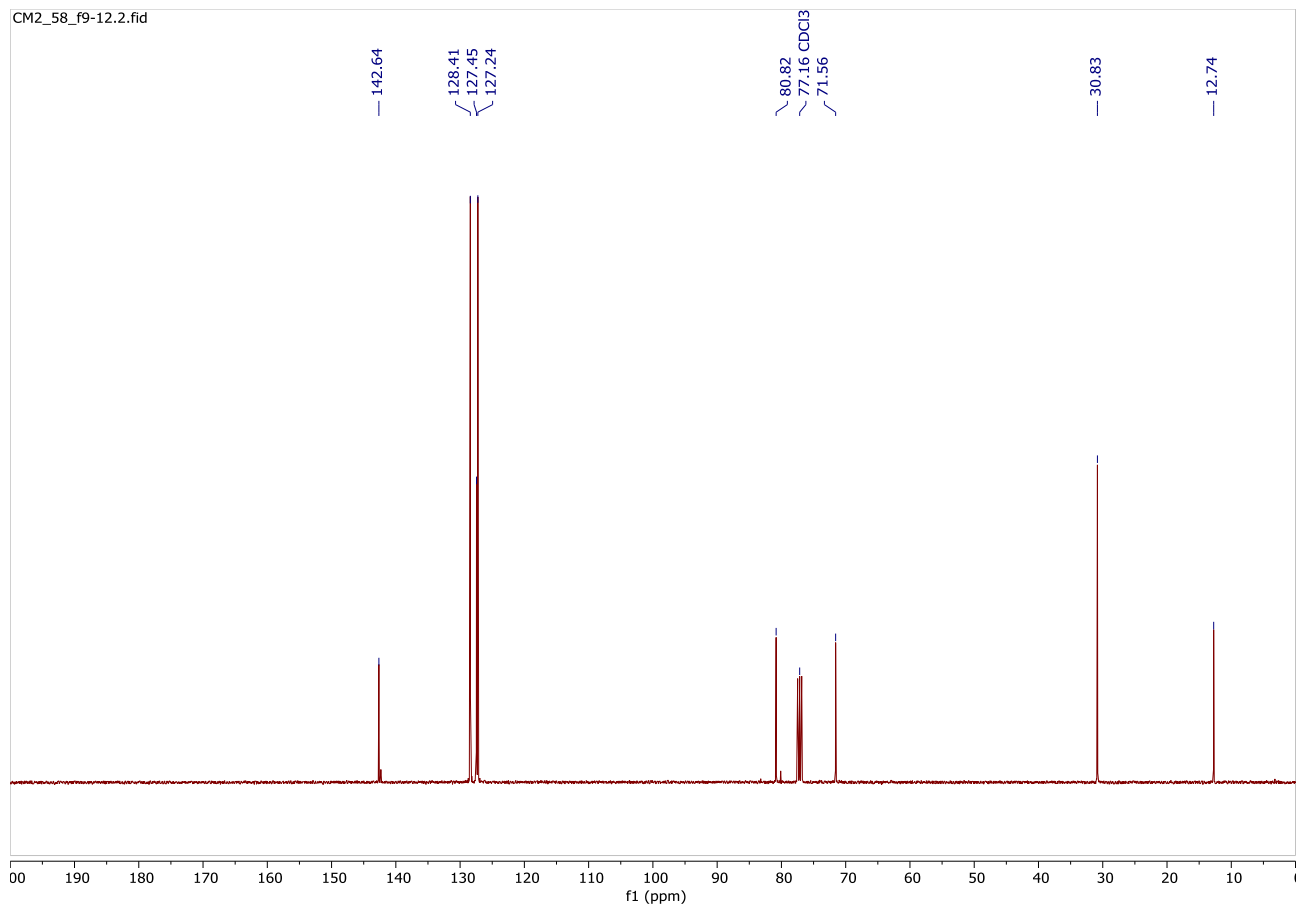

<sup>1</sup>H NMR (400 MHz, CDCl<sub>3</sub>)

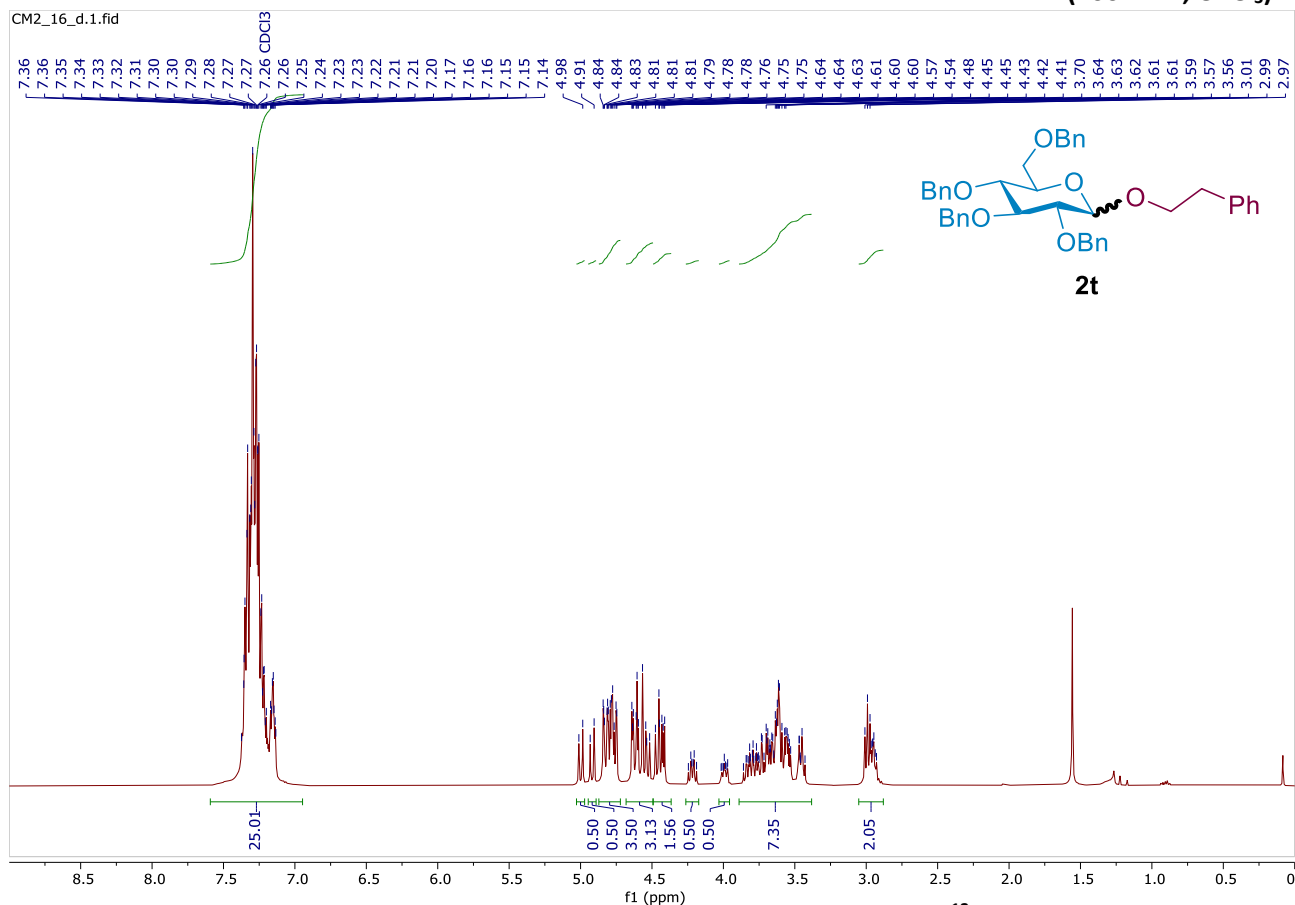

<sup>13</sup>C NMR (100 MHz, CDCl<sub>3</sub>)

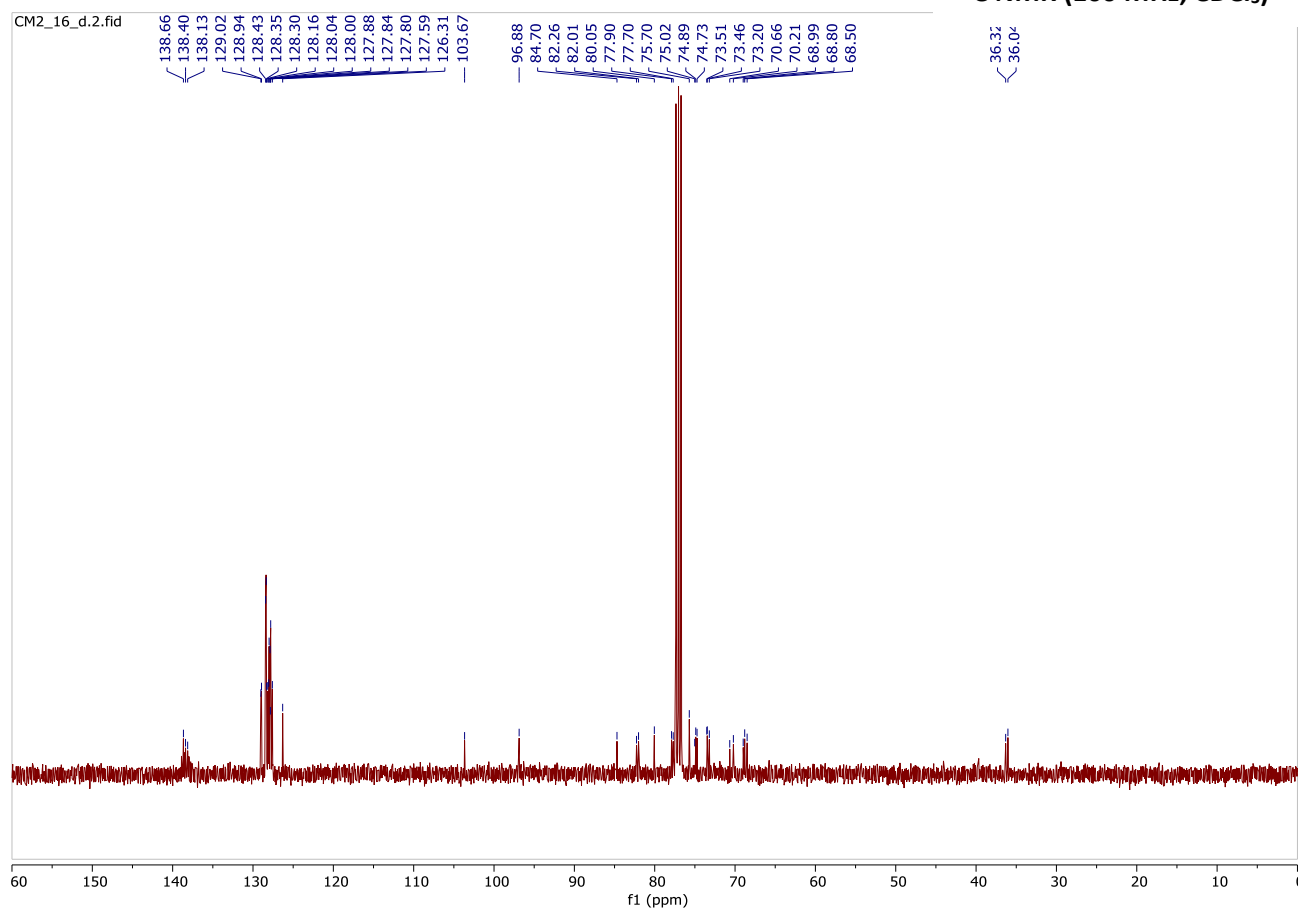

<sup>1</sup>H NMR (500 MHz, CDCl<sub>3</sub>)

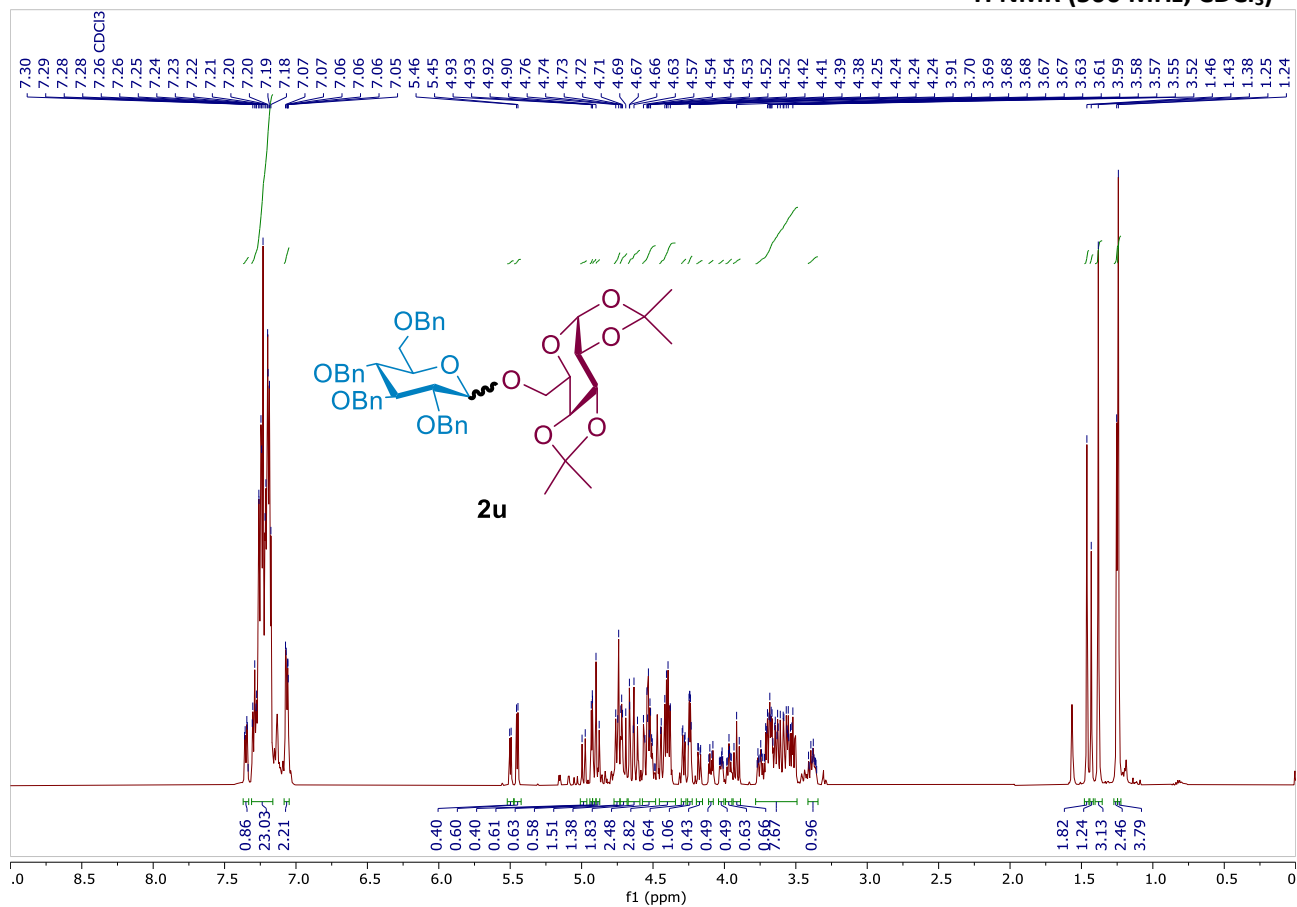

<sup>13</sup>C NMR (125 MHz, CDCl<sub>3</sub>)

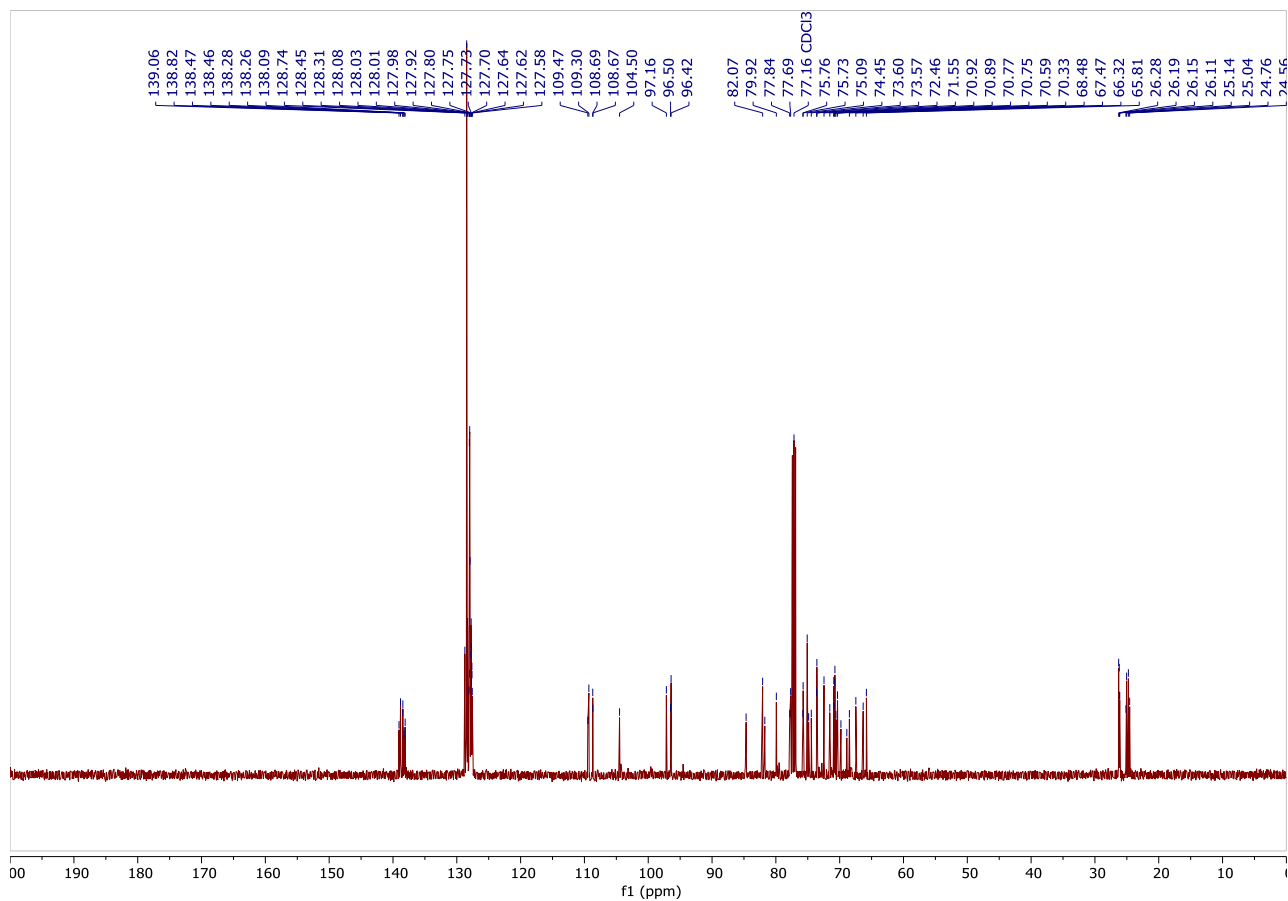

<sup>1</sup>H NMR (400 MHz, CDCl<sub>3</sub>)

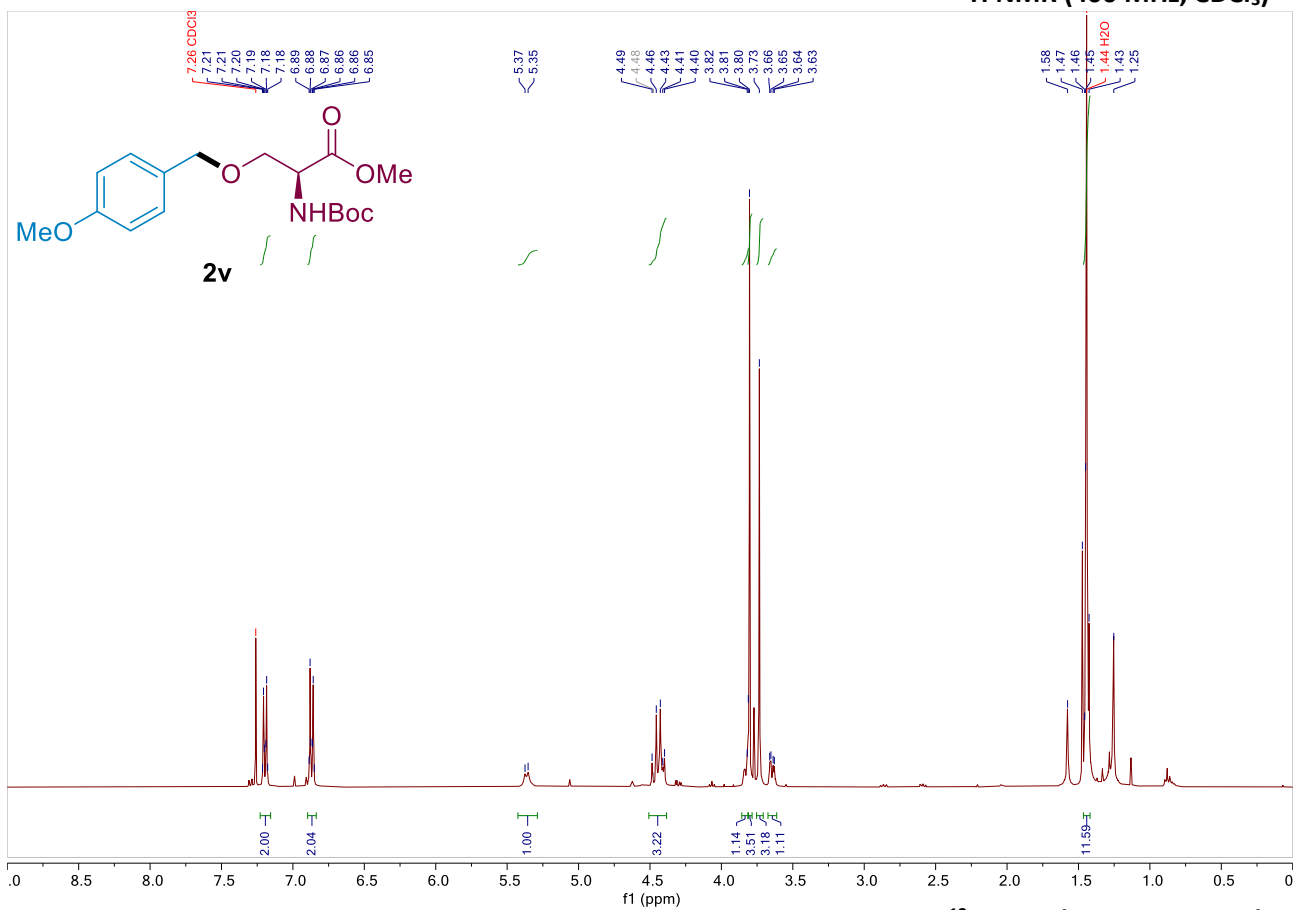

<sup>13</sup>C NMR (125 MHz, CDCl<sub>3</sub>)

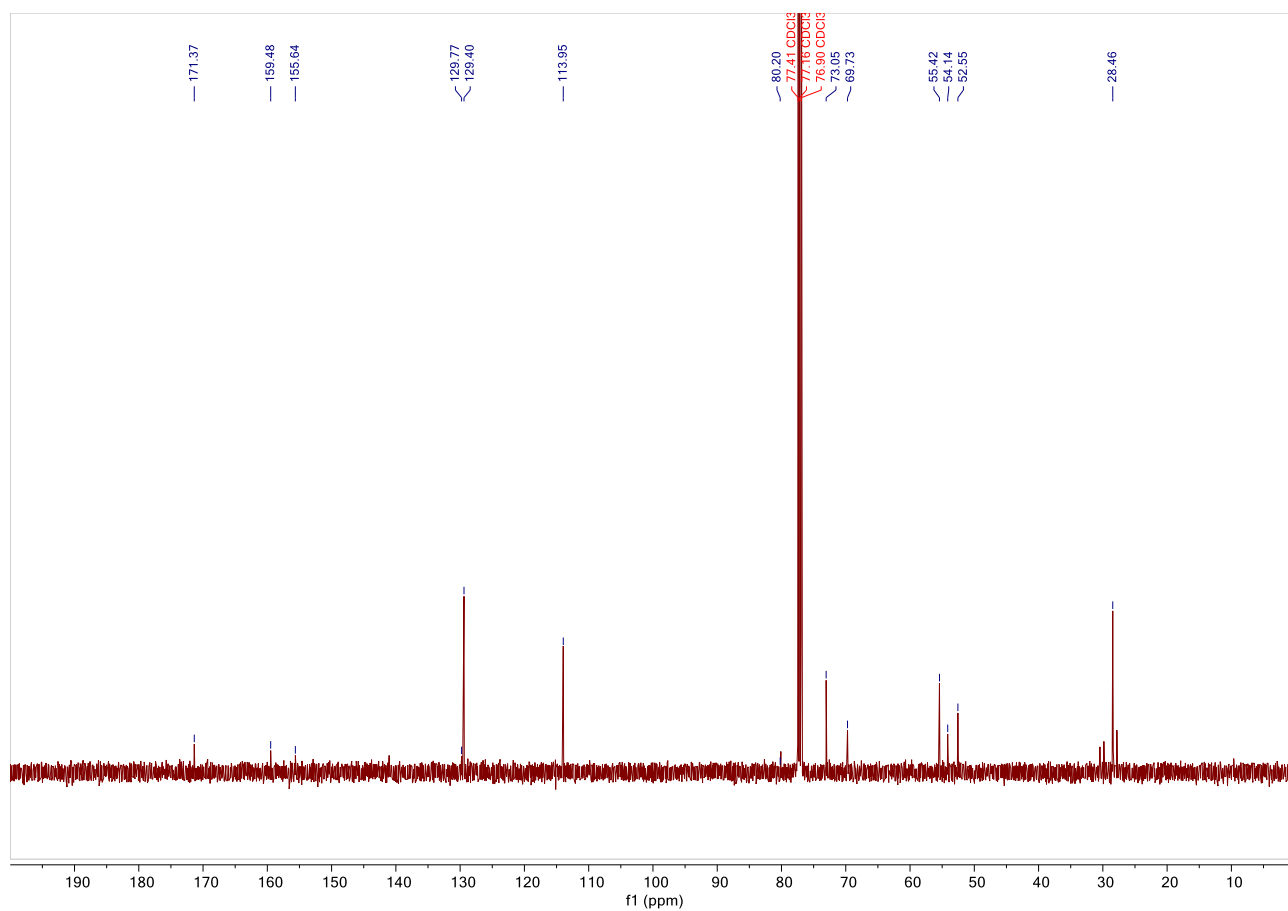

<sup>1</sup>H NMR (400 MHz, CDCl<sub>3</sub>)

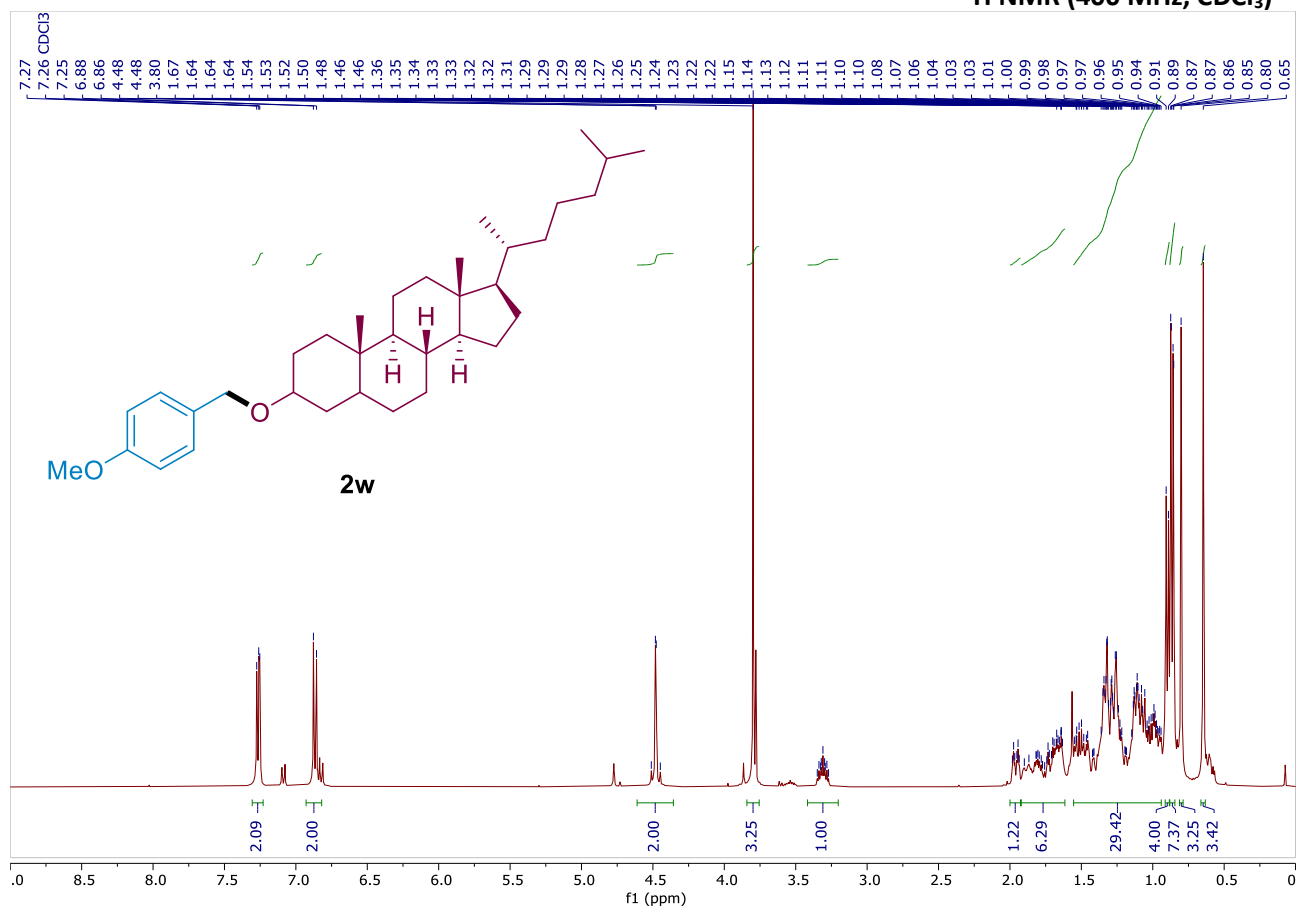

<sup>13</sup>C NMR (100 MHz, CDCl<sub>3</sub>)

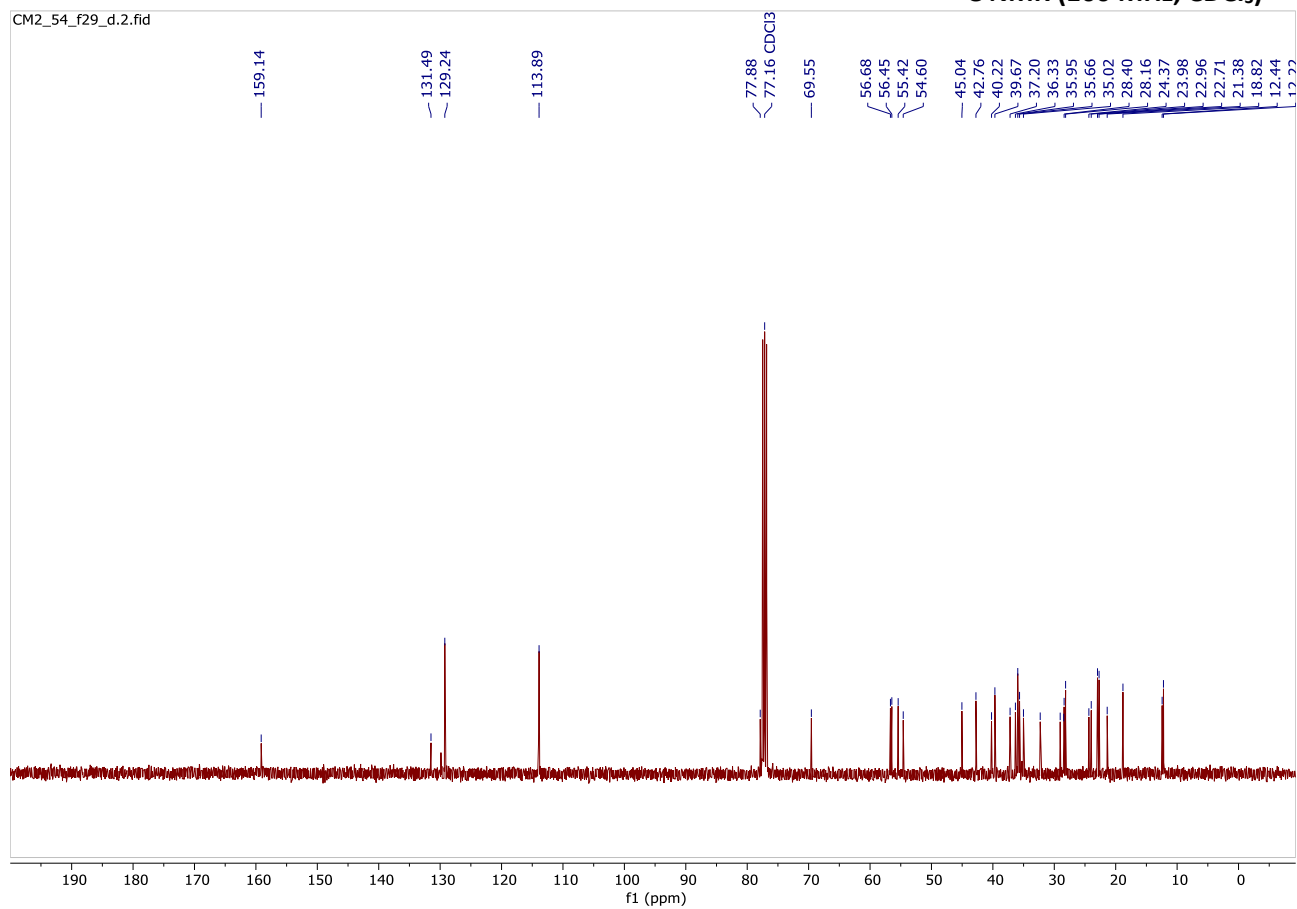

<sup>1</sup>H NMR (400 MHz, CDCl<sub>3</sub>)

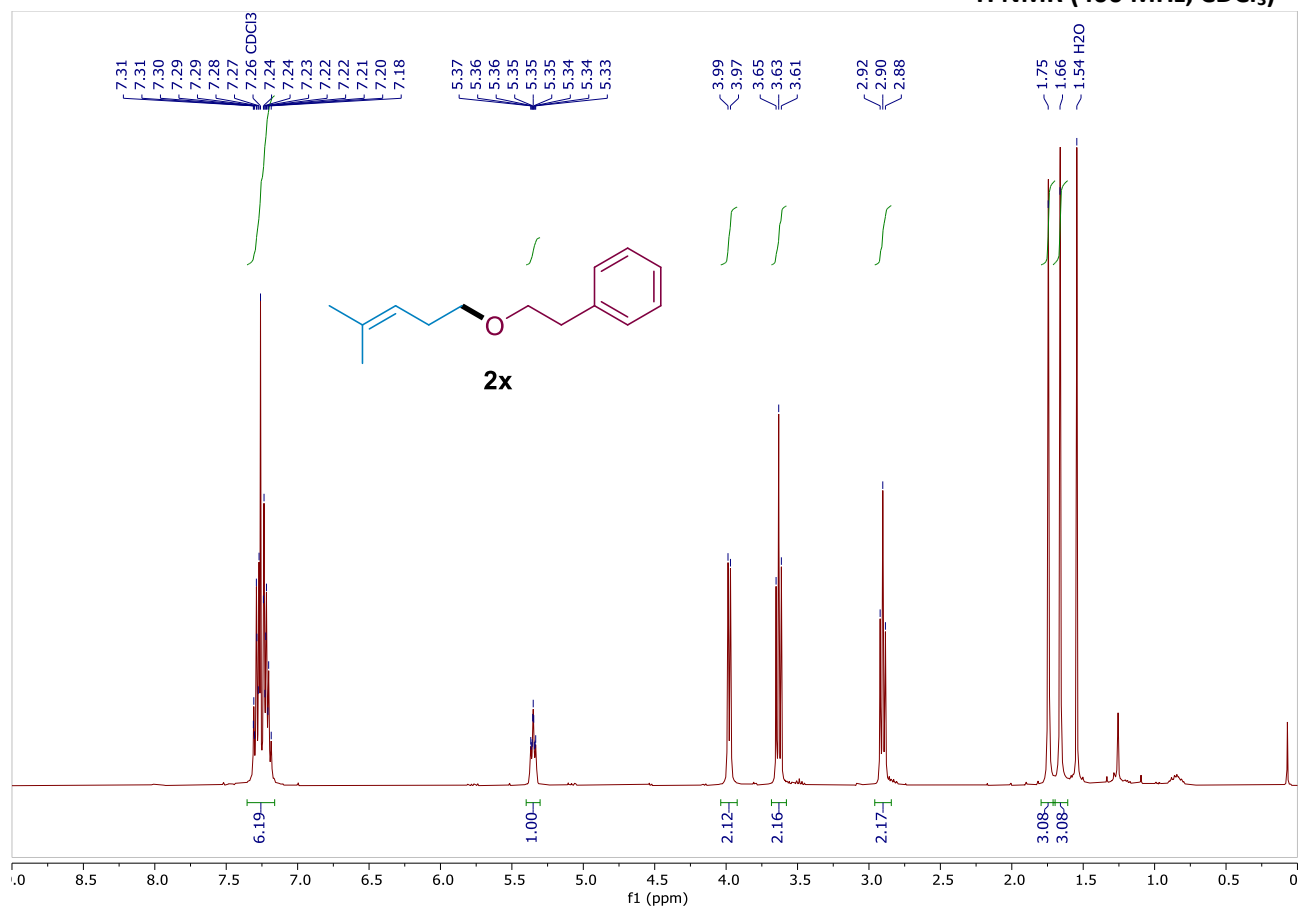

<sup>13</sup>C NMR (125 MHz, CDCl<sub>3</sub>)

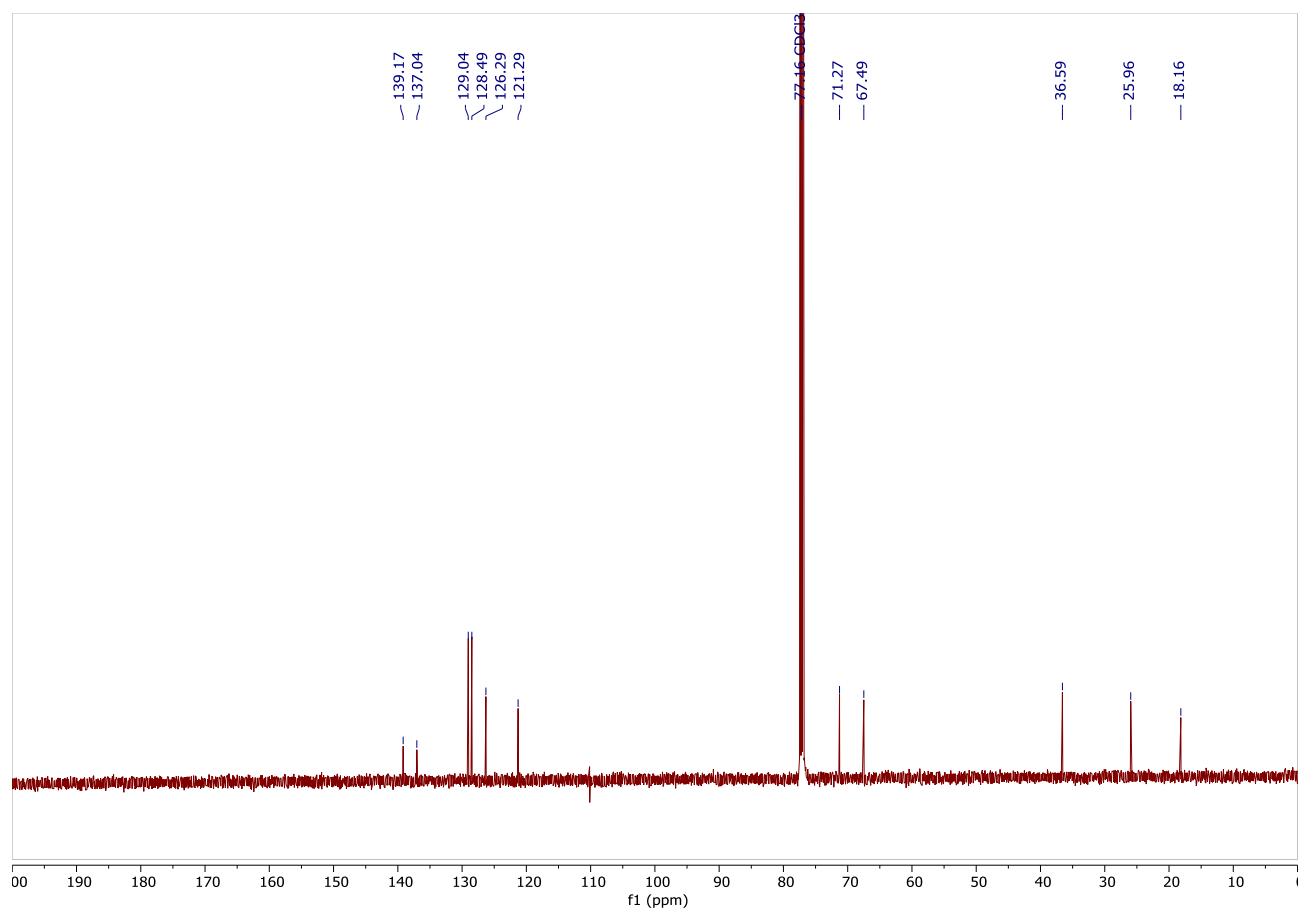

<sup>1</sup>H NMR (400 MHz, CDCl<sub>3</sub>)

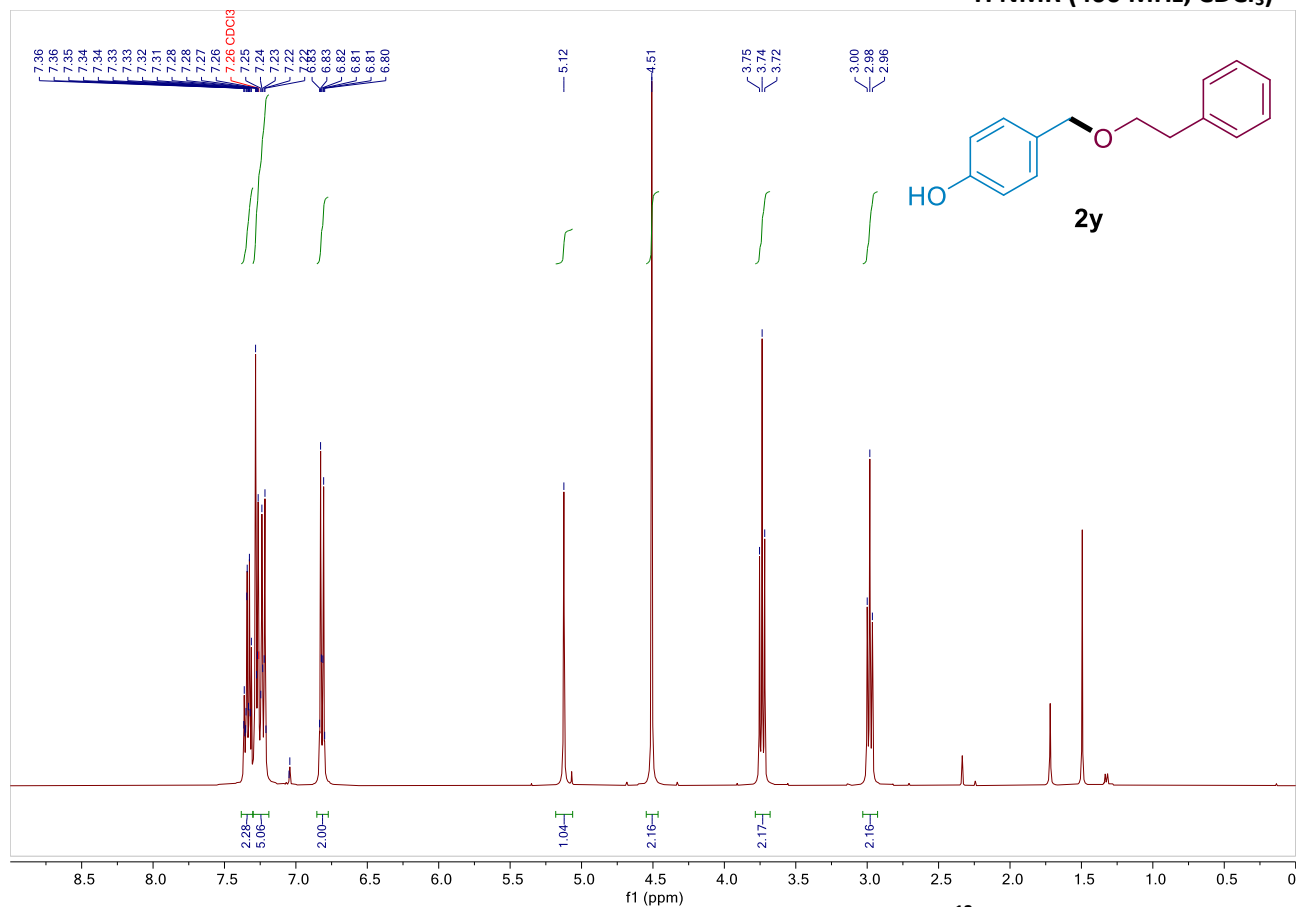

<sup>13</sup>C NMR (100 MHz, CDCl<sub>3</sub>)

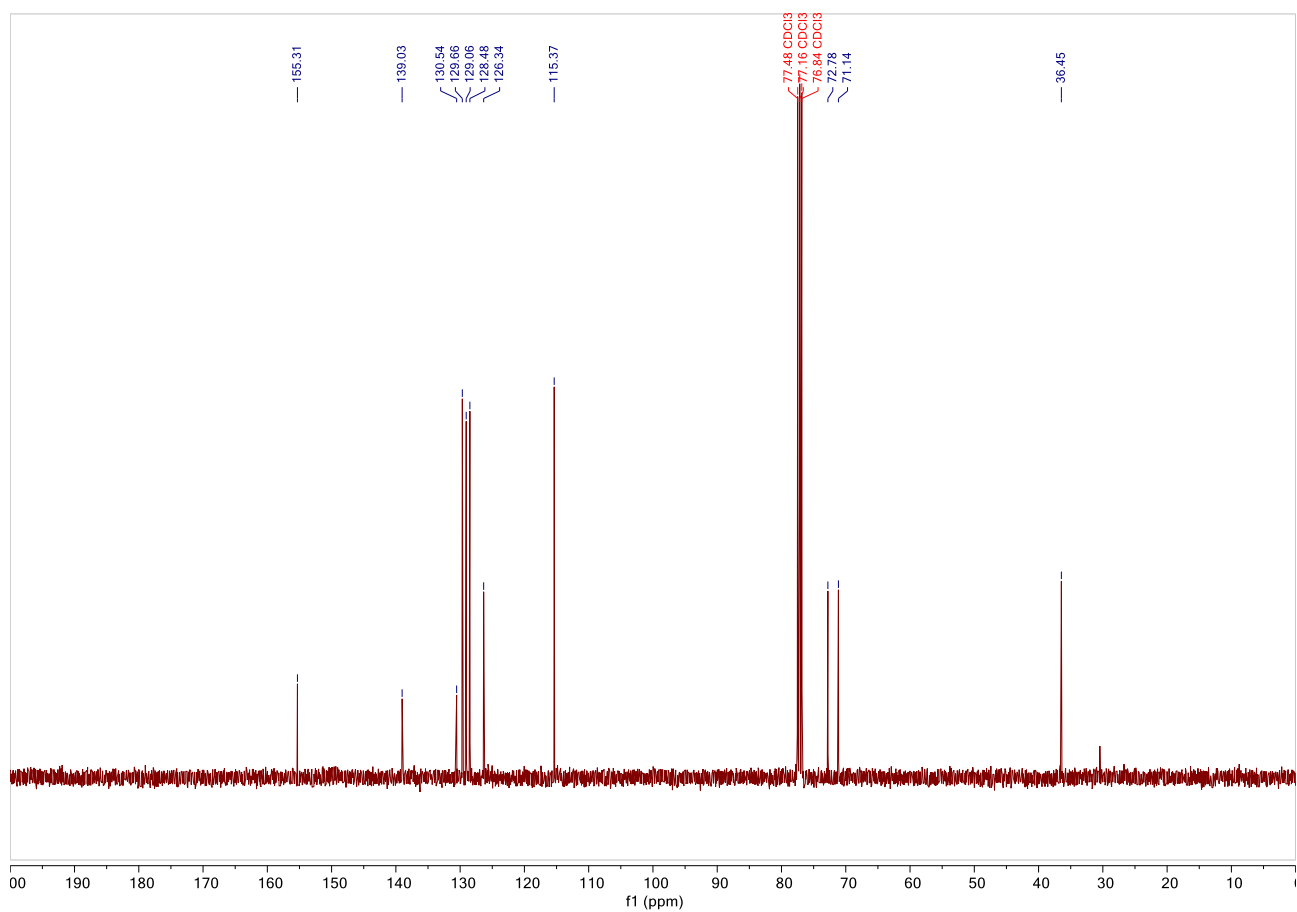

<sup>1</sup>H NMR (400 MHz, CDCl<sub>3</sub>)

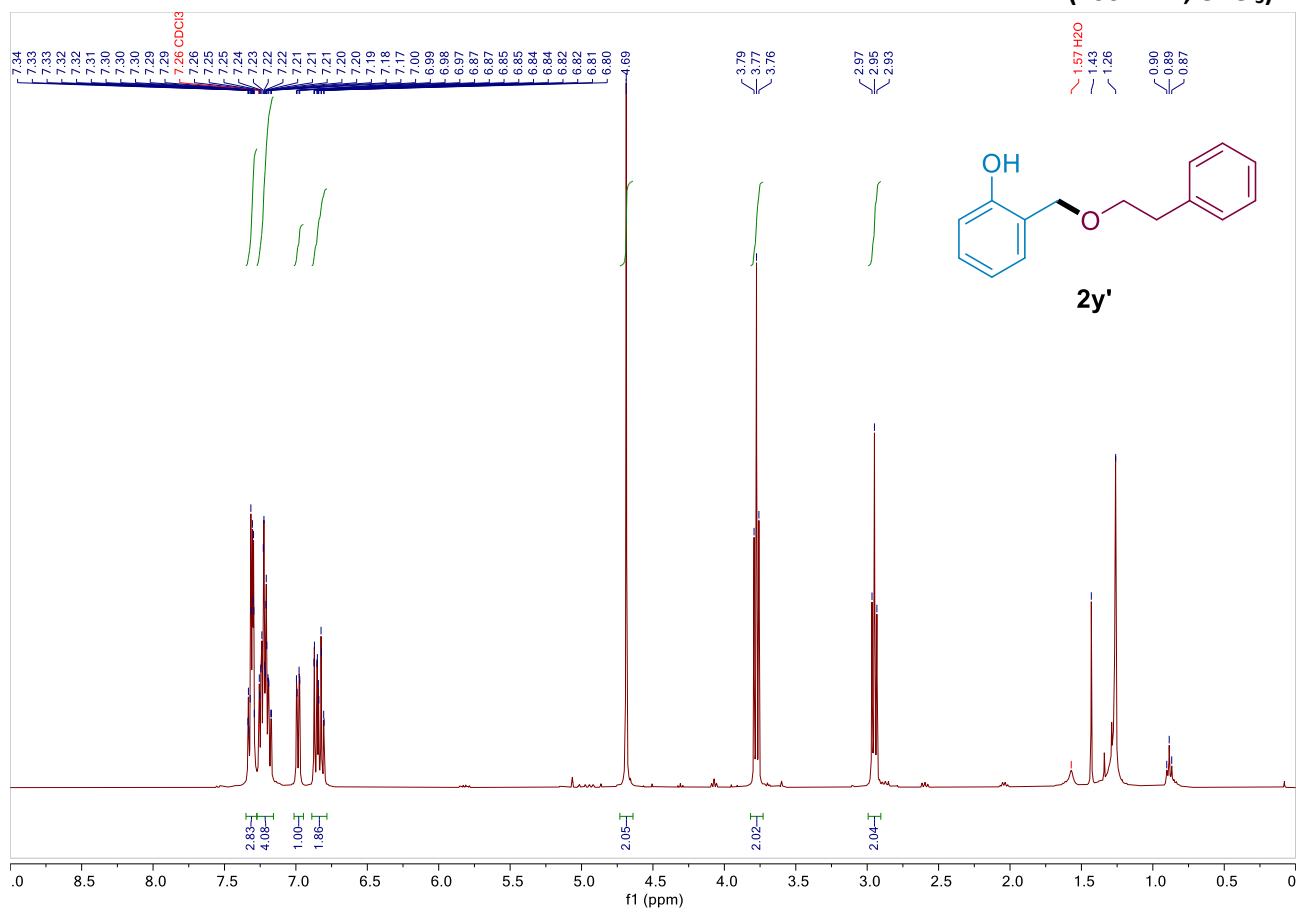

<sup>13</sup>C NMR (125 MHz, CDCl<sub>3</sub>)

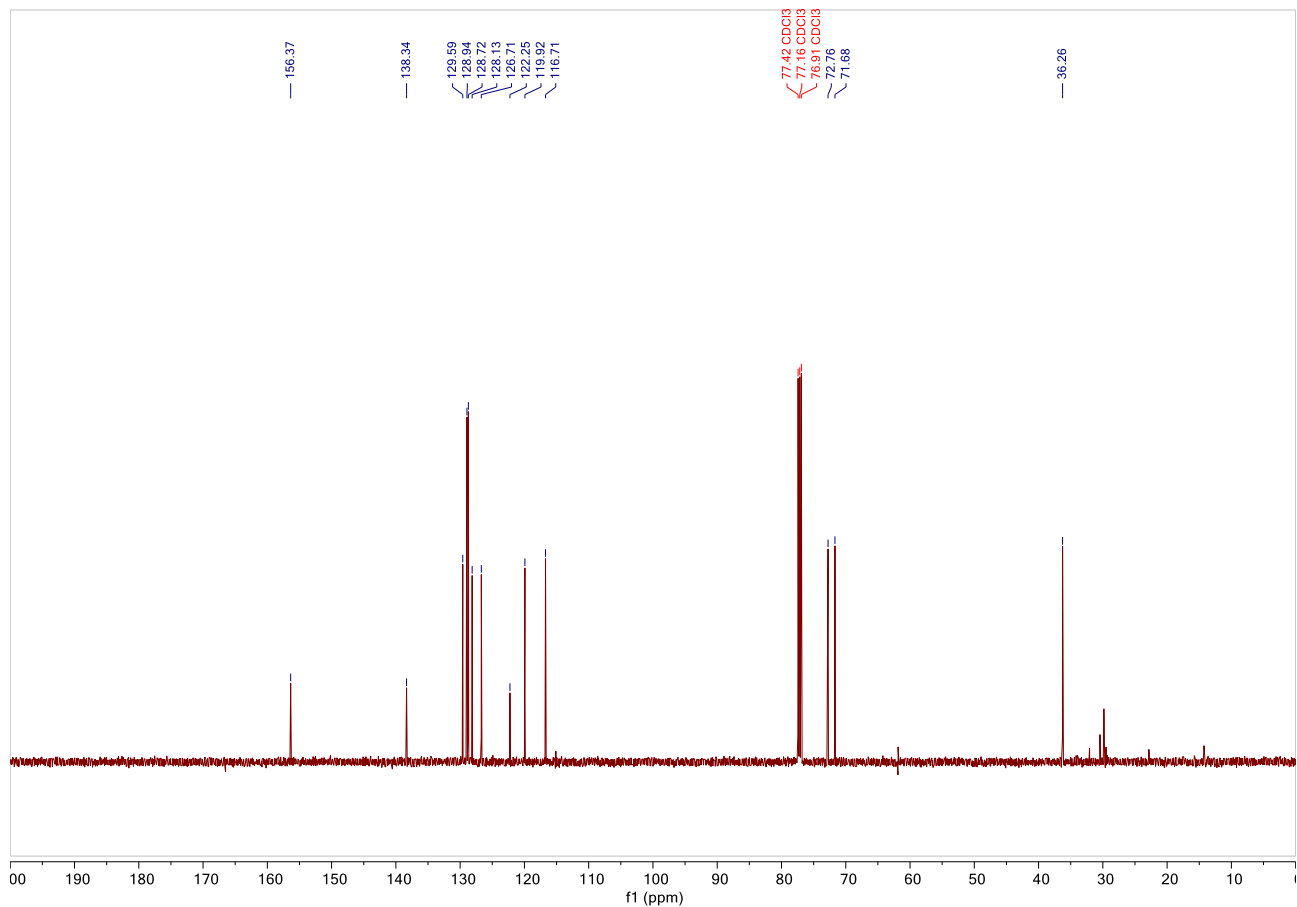

**<sup>1</sup>H NMR (400 MHz, CDCl<sub>3</sub>)**

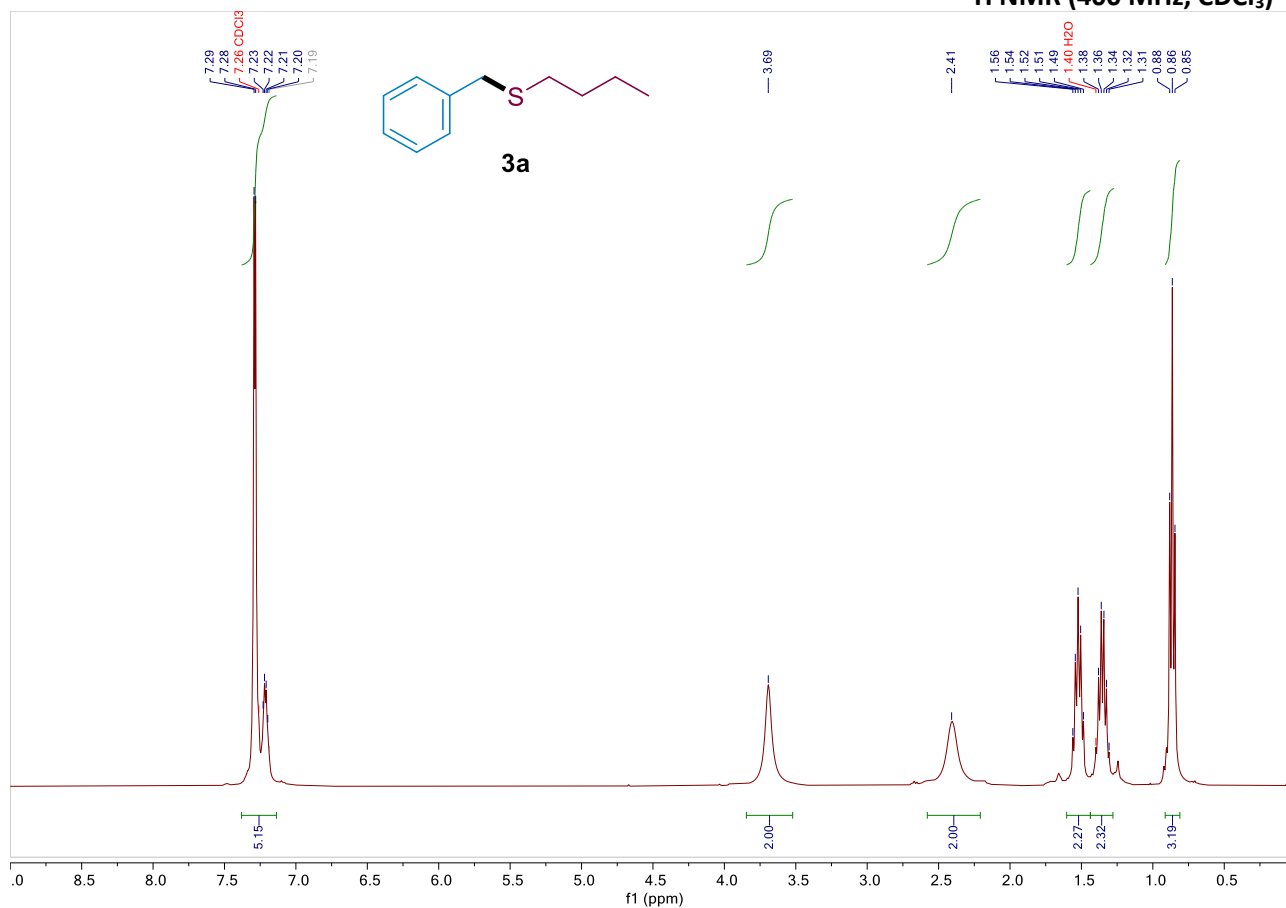

**<sup>13</sup>C NMR (100 MHz, CDCl<sub>3</sub>)**

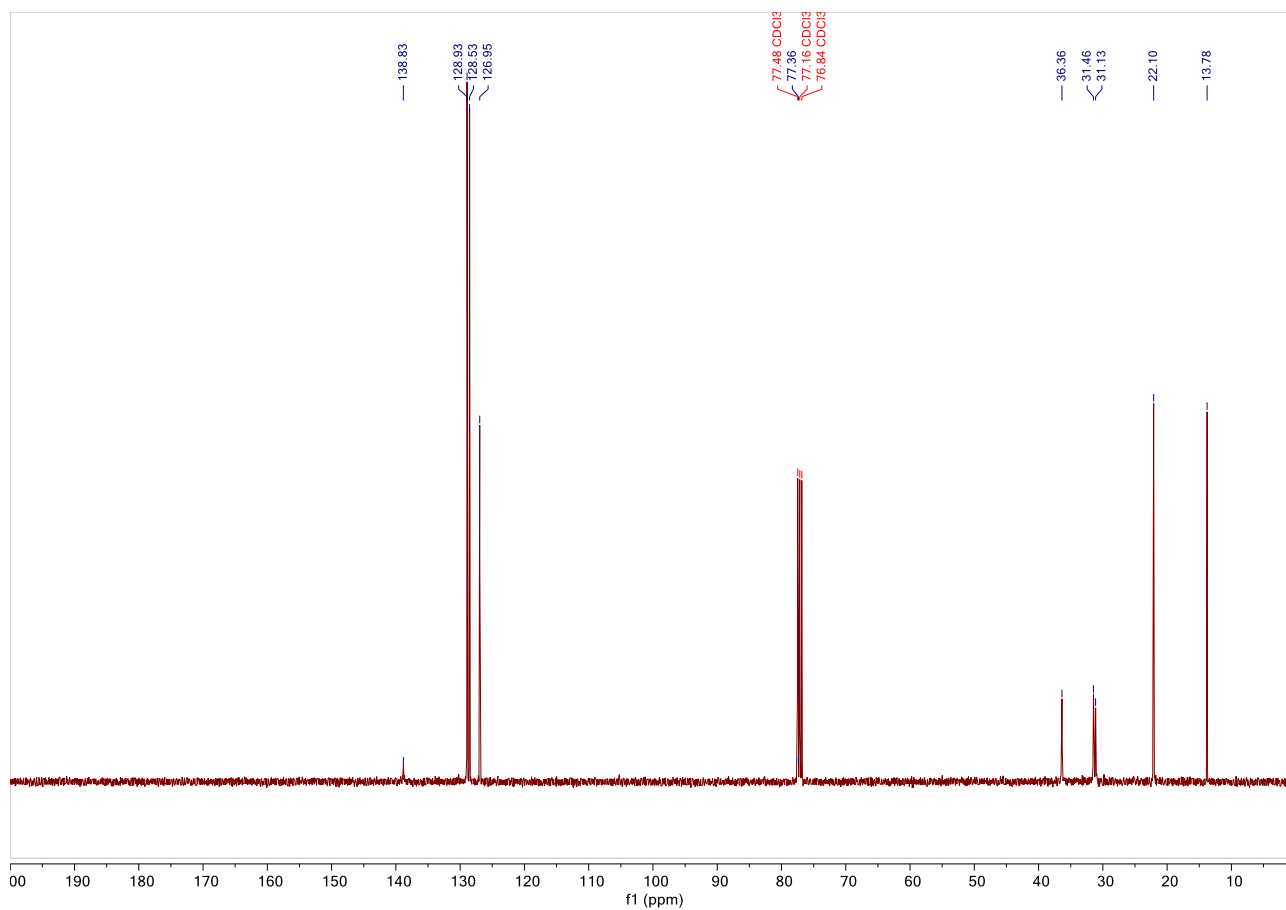

**<sup>1</sup>H NMR (400 MHz, CDCl<sub>3</sub>)**

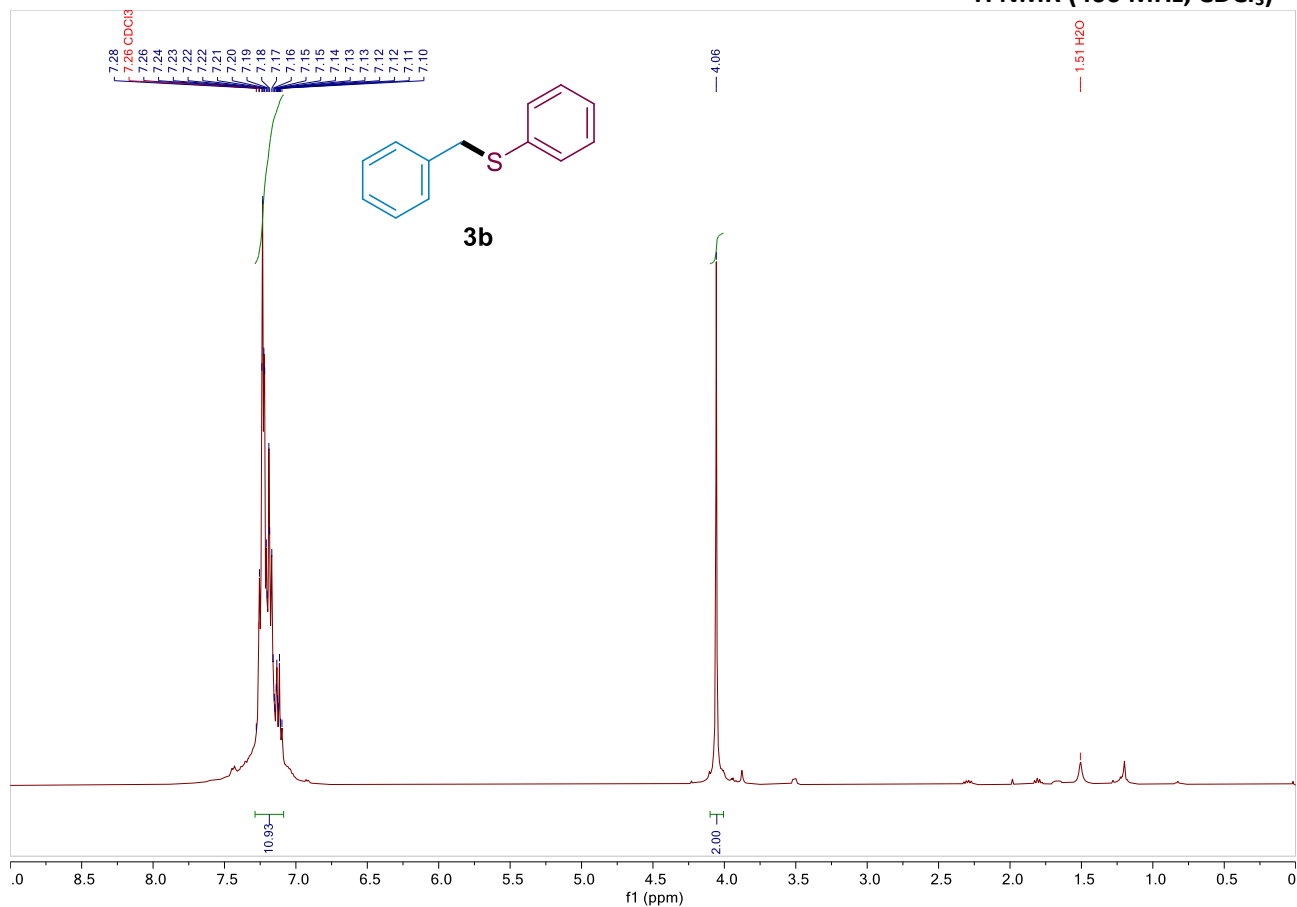

**<sup>13</sup>C NMR (100 MHz, CDCl<sub>3</sub>)**

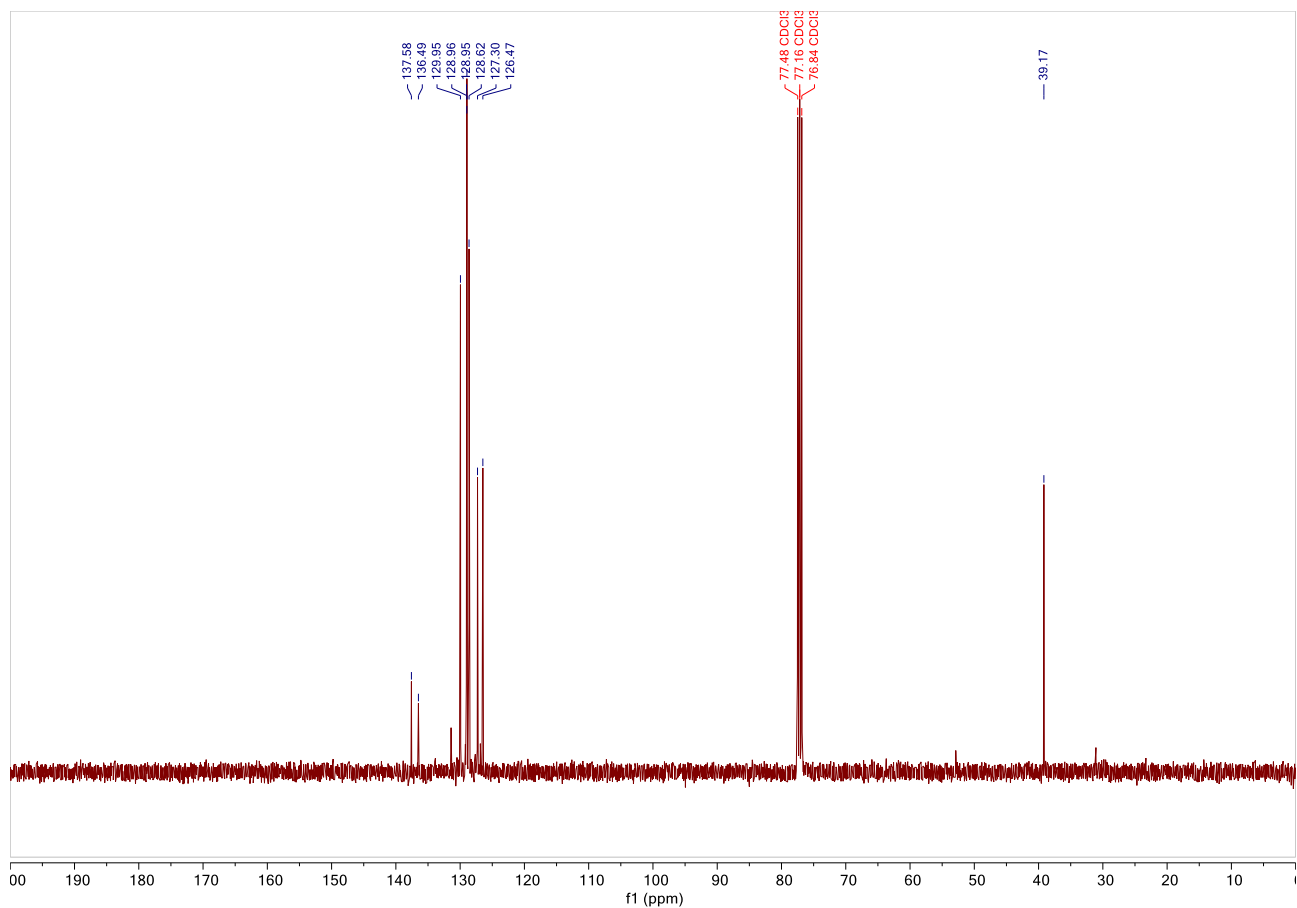

**<sup>1</sup>H NMR (400 MHz, CDCl<sub>3</sub>)**

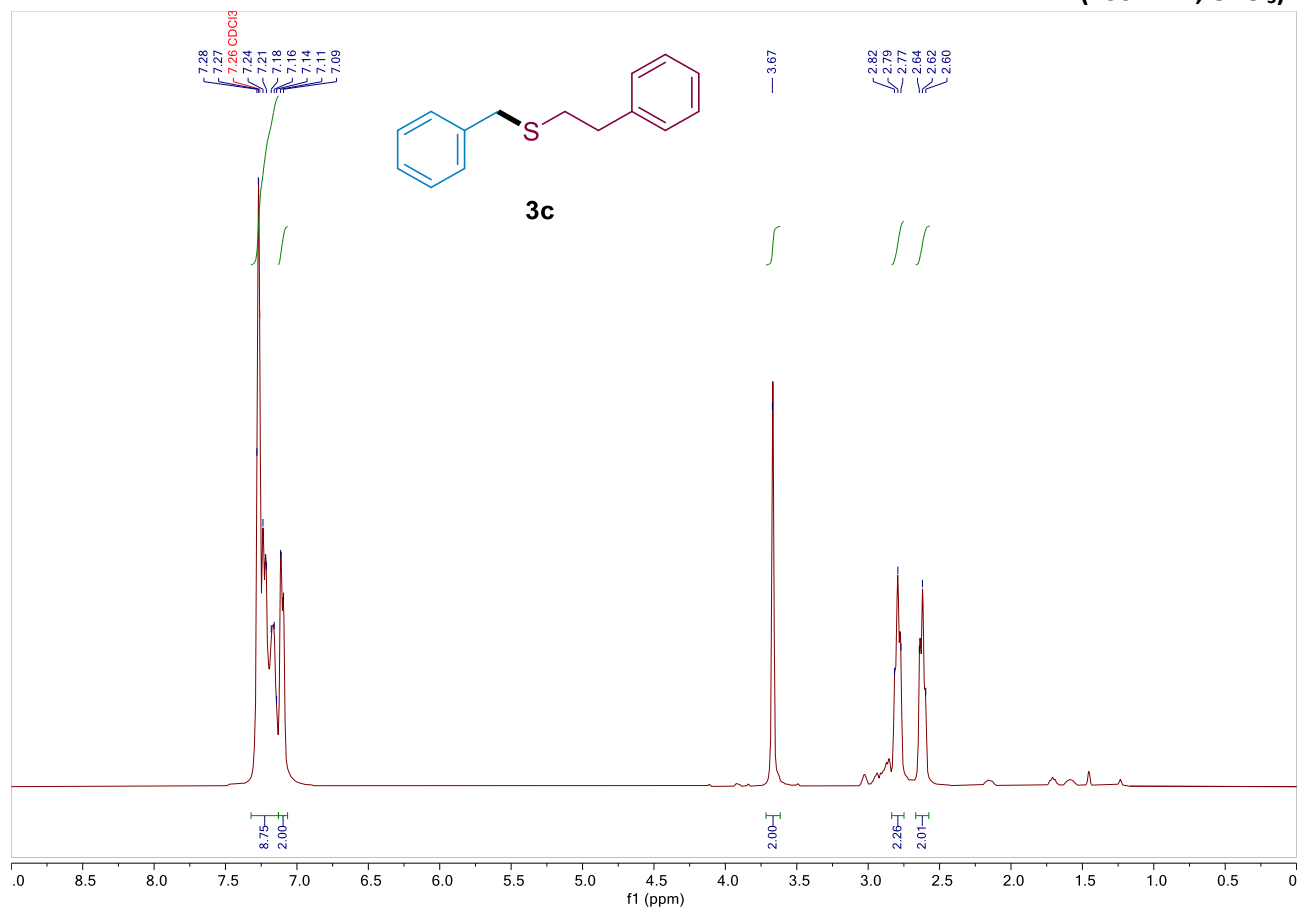

**<sup>13</sup>C NMR (100 MHz, CDCl<sub>3</sub>)**

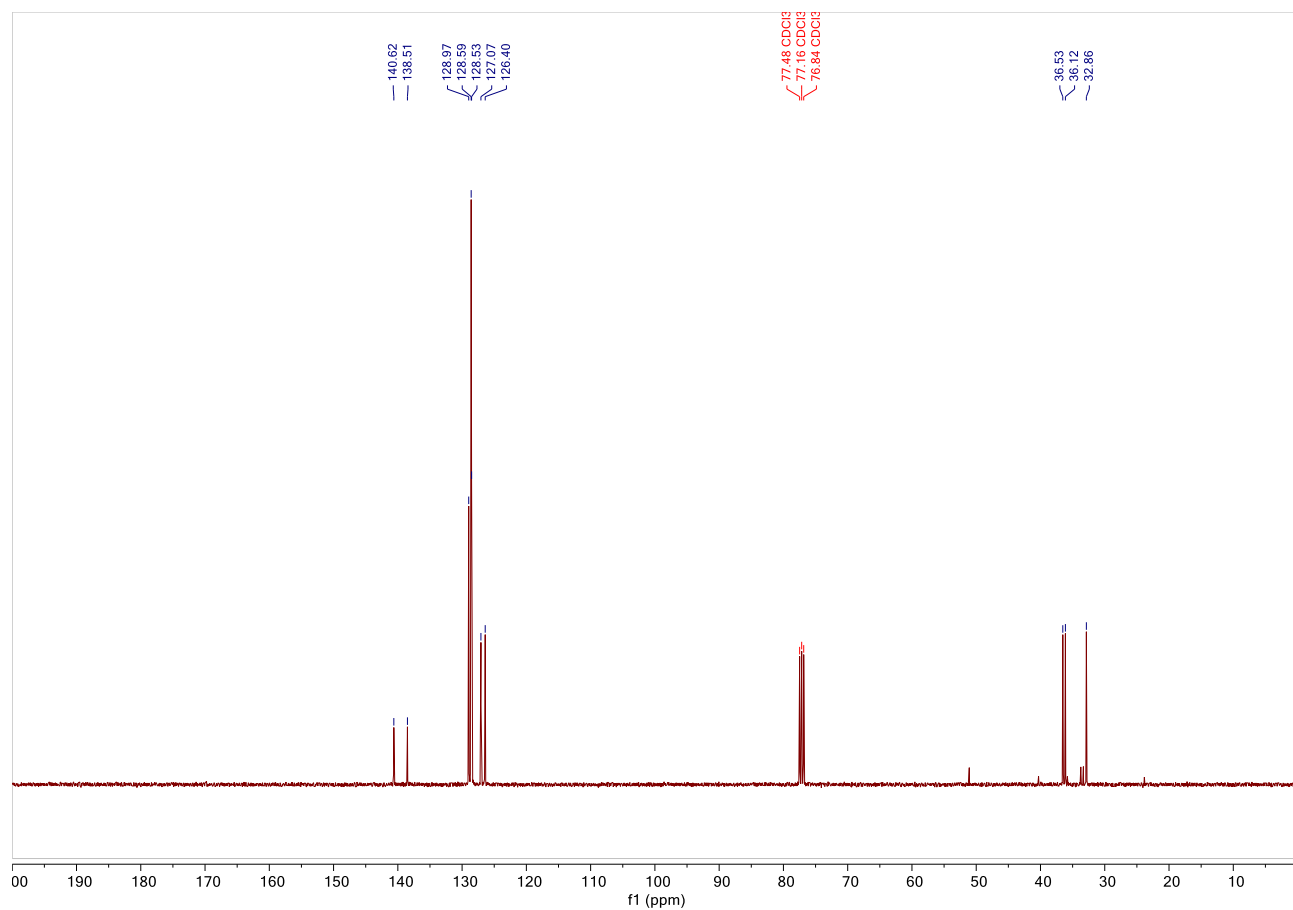

**<sup>1</sup>H NMR (400 MHz, CDCl<sub>3</sub>)**

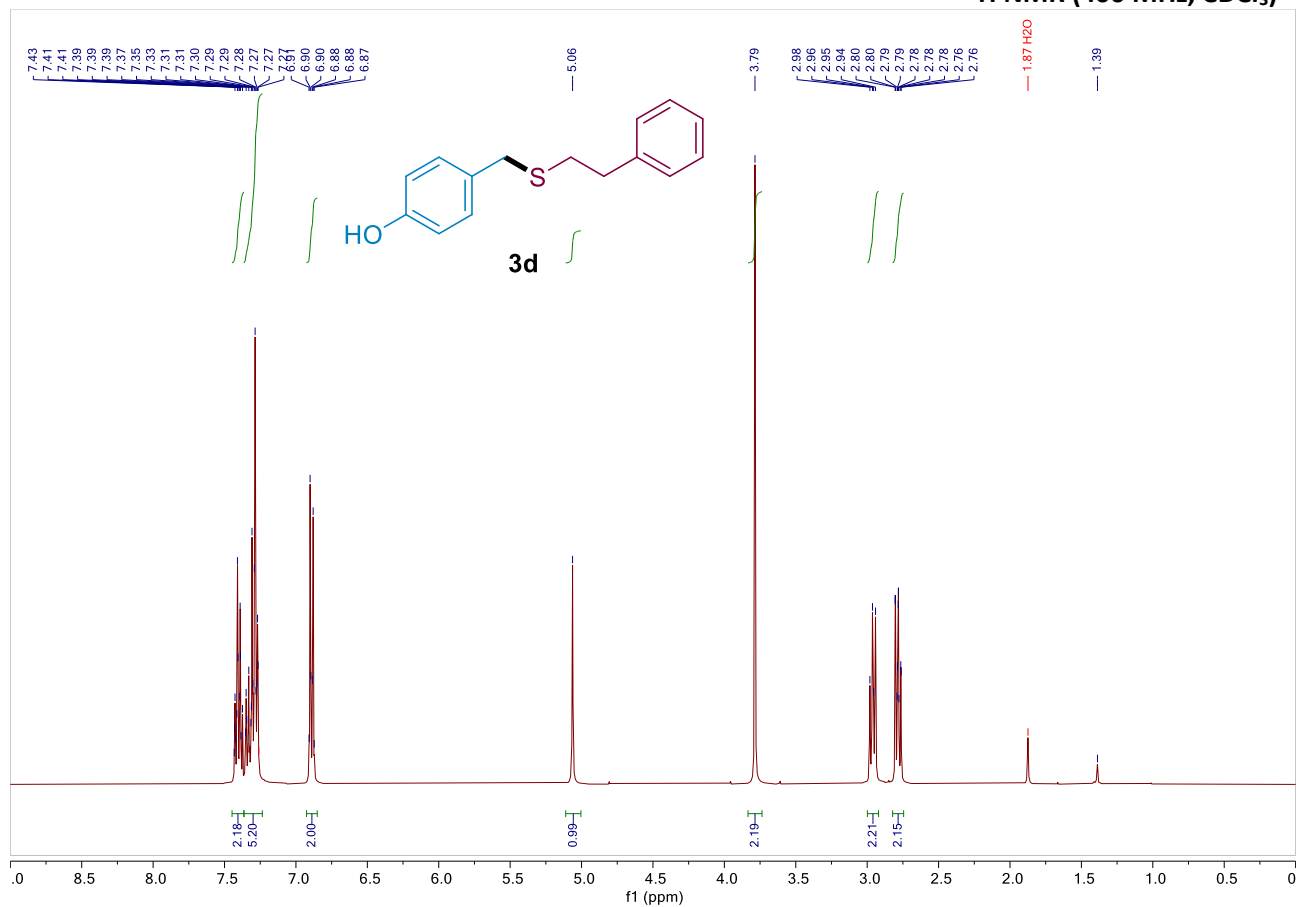

**<sup>13</sup>C NMR (100 MHz, CDCl<sub>3</sub>)**

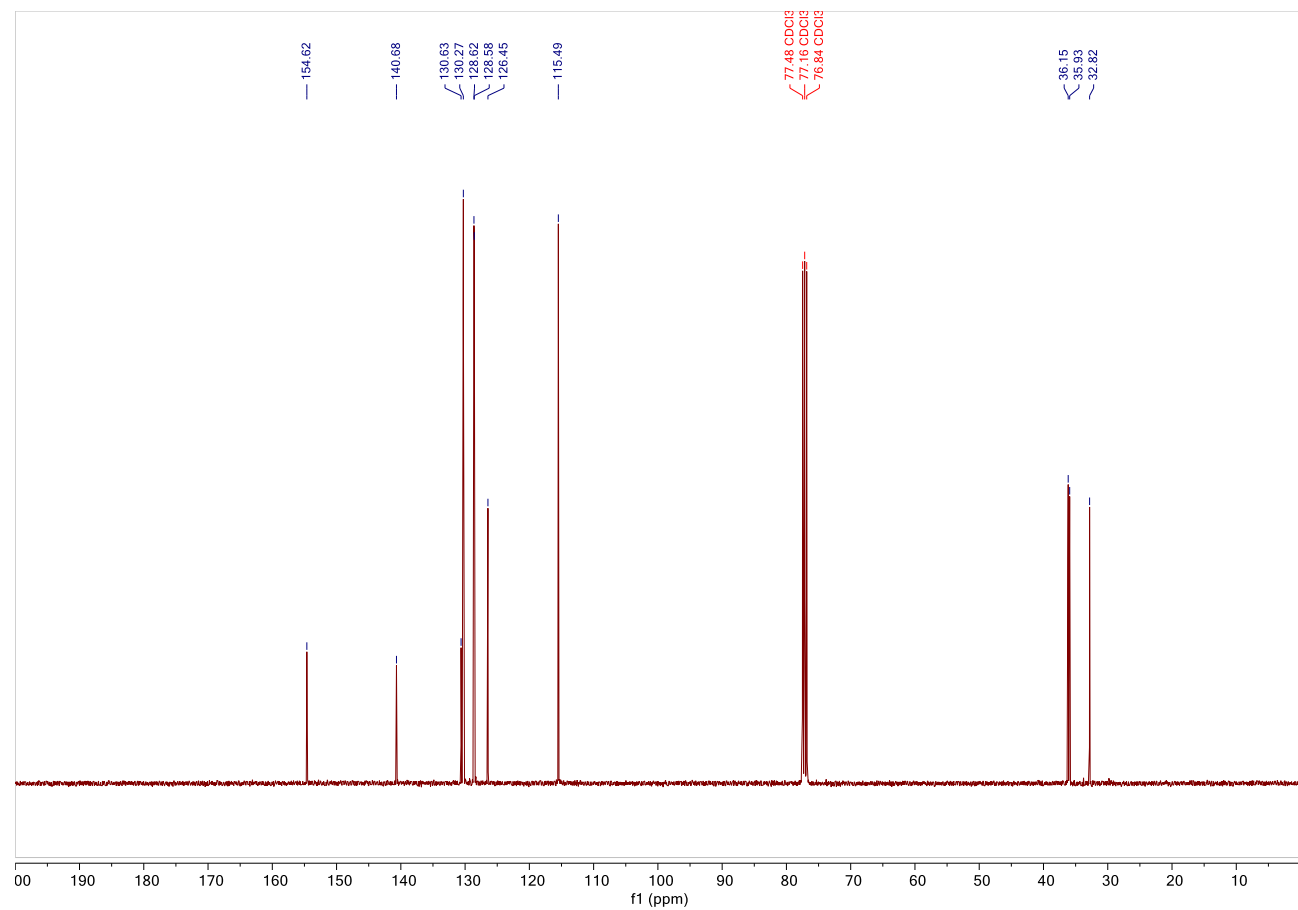

<sup>1</sup>H NMR (500 MHz, CDCl<sub>3</sub>)

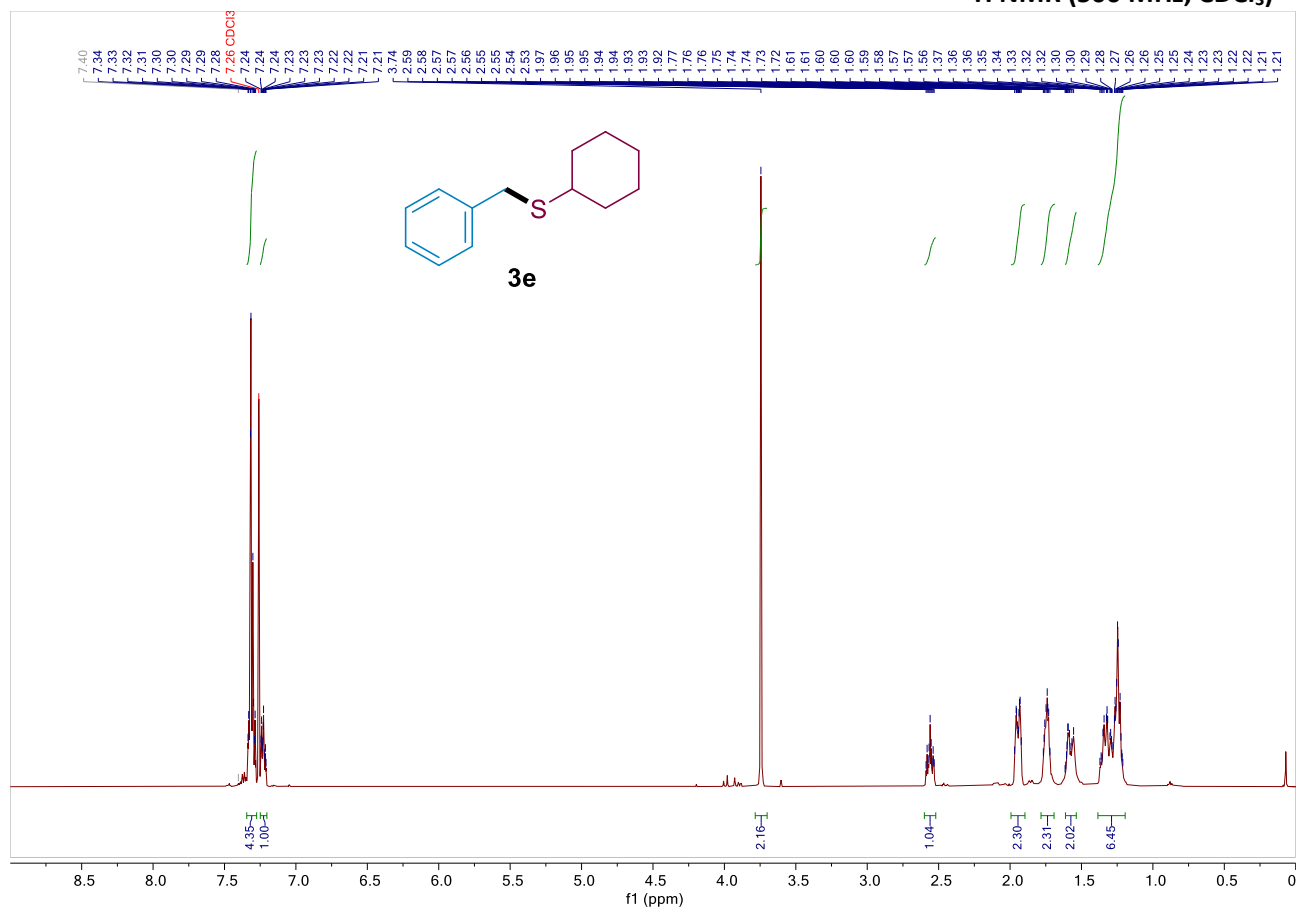

<sup>13</sup>C NMR (125 MHz, CDCl<sub>3</sub>)

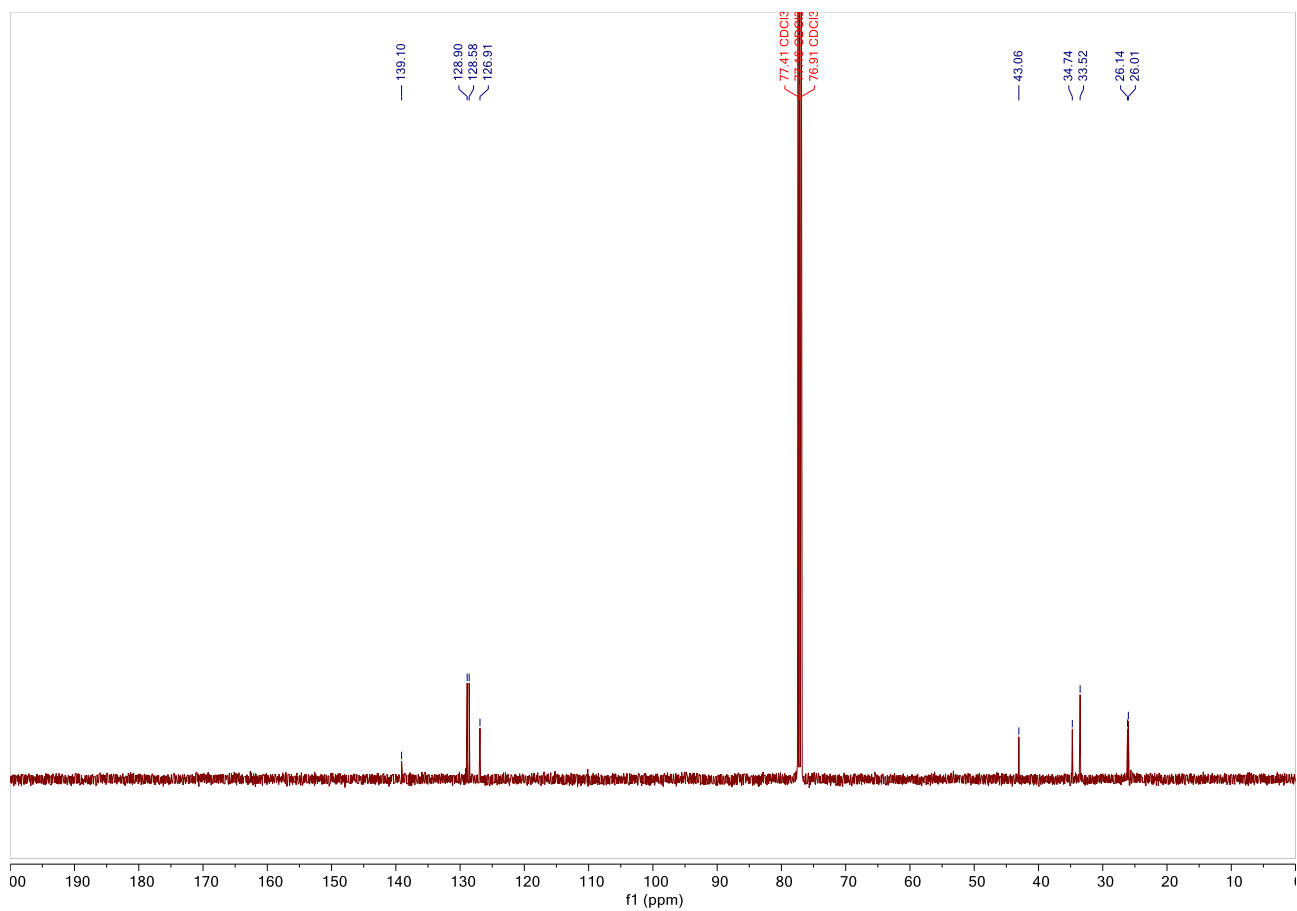

**<sup>1</sup>H NMR (400 MHz, CDCl<sub>3</sub>)**

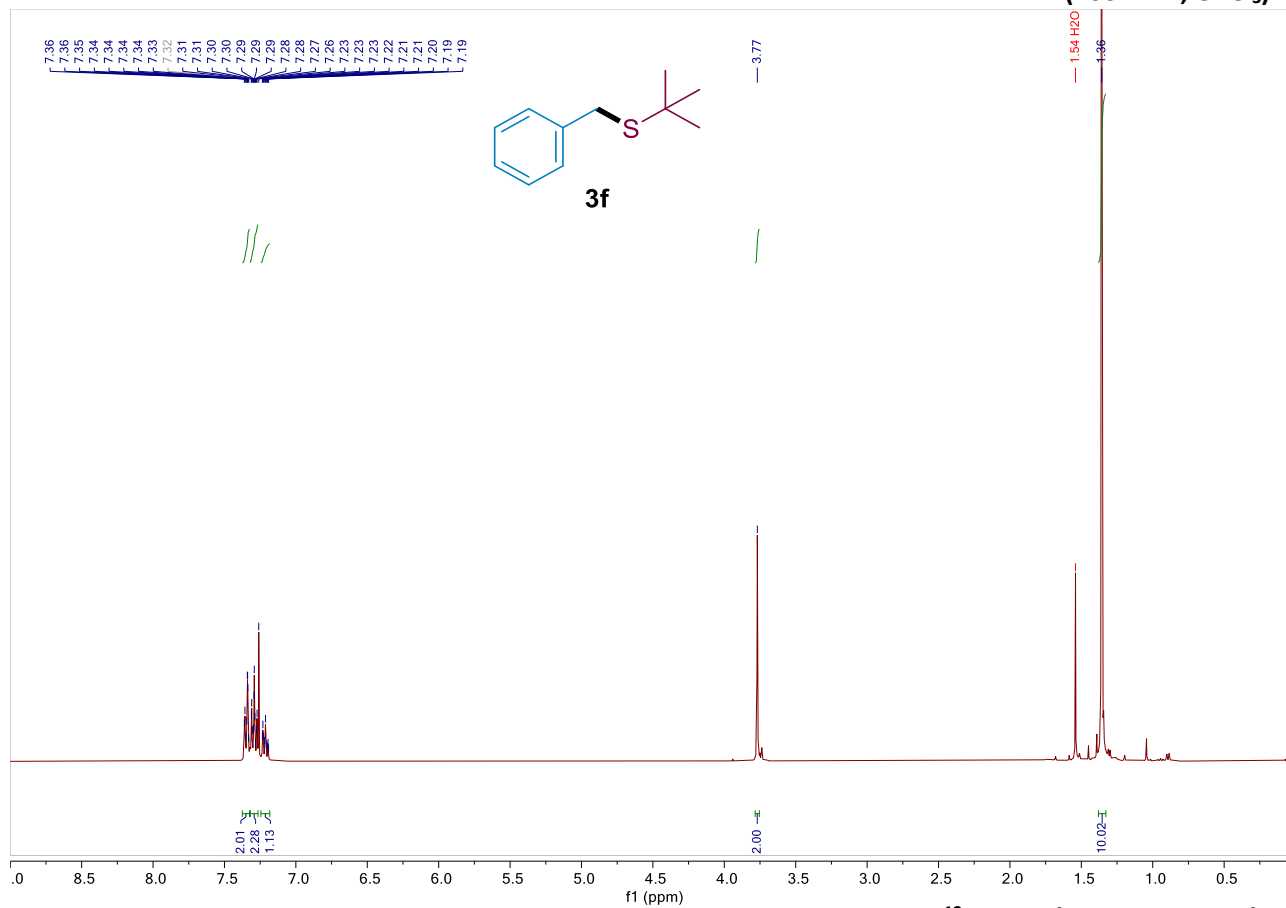

**<sup>13</sup>C NMR (100 MHz, CDCl<sub>3</sub>)**

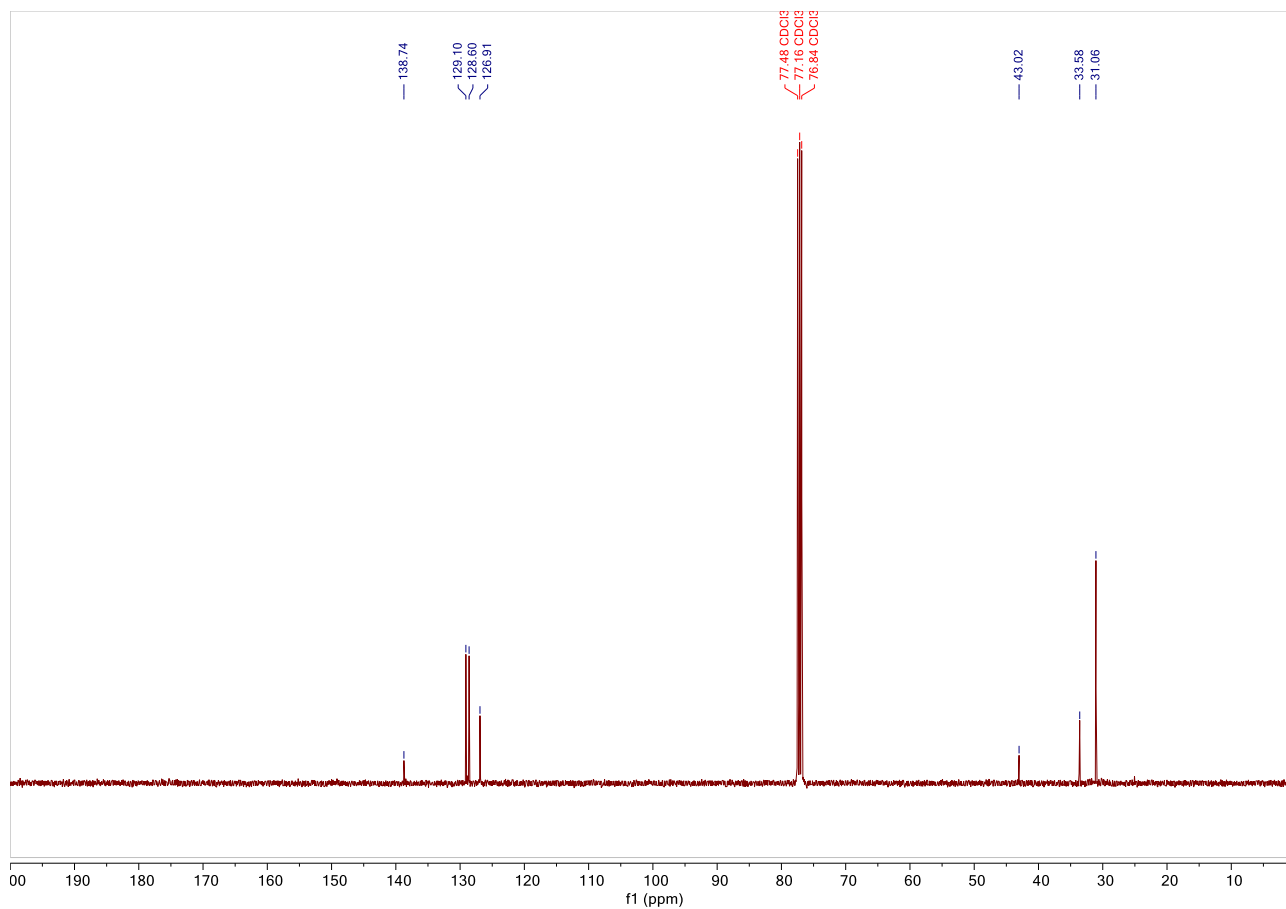

**<sup>1</sup>H NMR (400 MHz, CDCl<sub>3</sub>)**

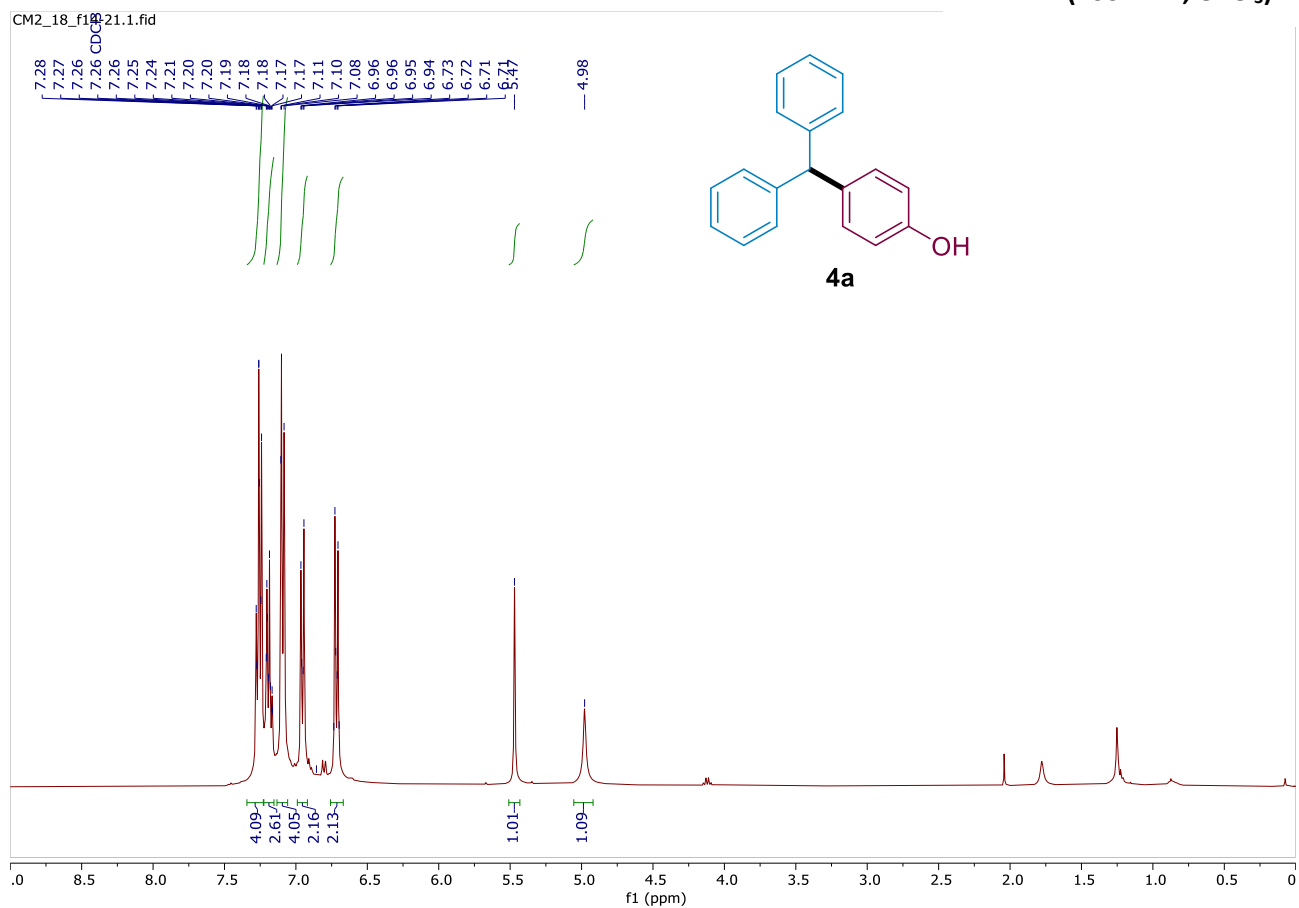

**<sup>13</sup>C NMR (125 MHz, CDCl<sub>3</sub>)**

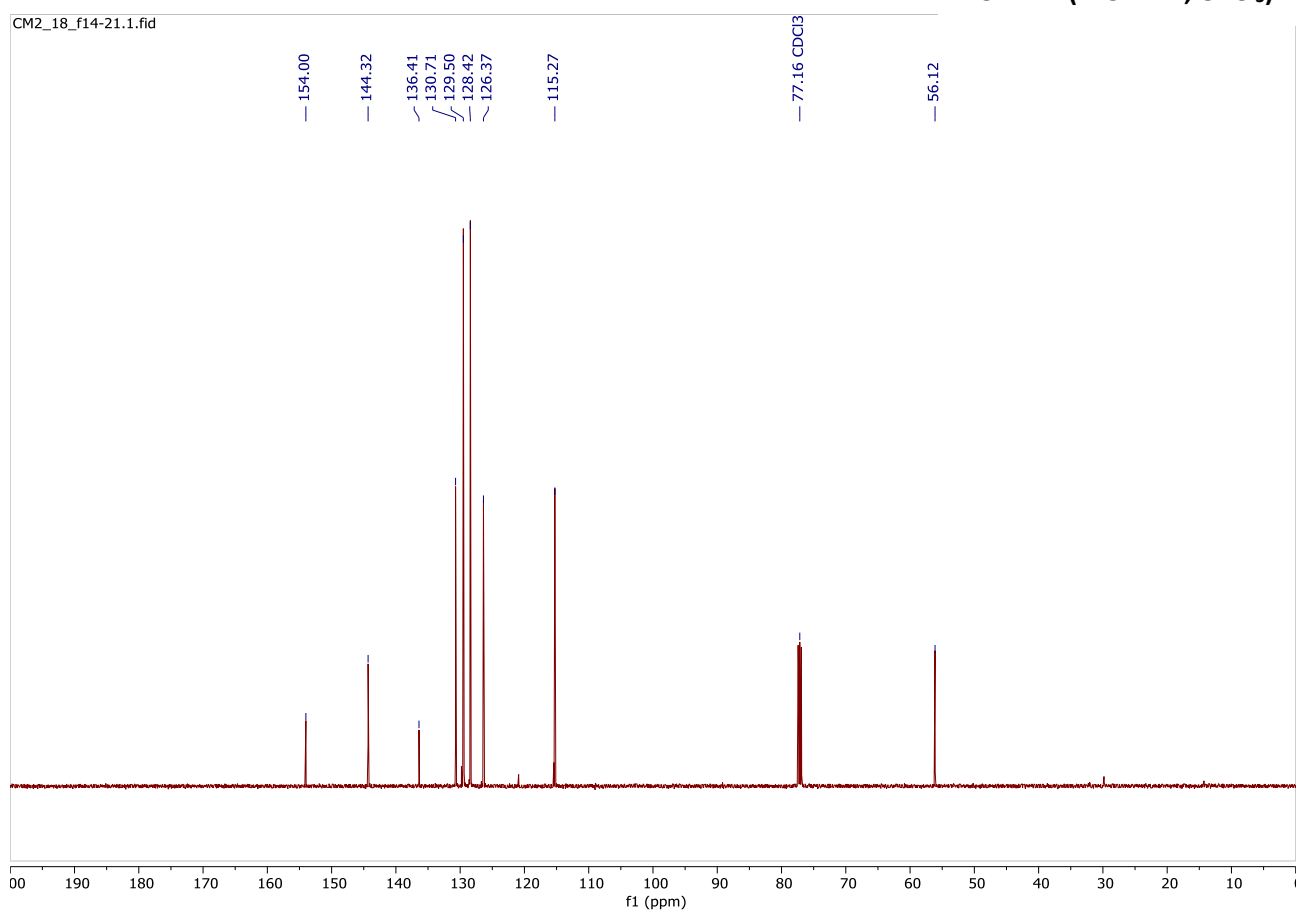

**<sup>1</sup>H NMR (400 MHz, acetone-d<sub>6</sub>)**

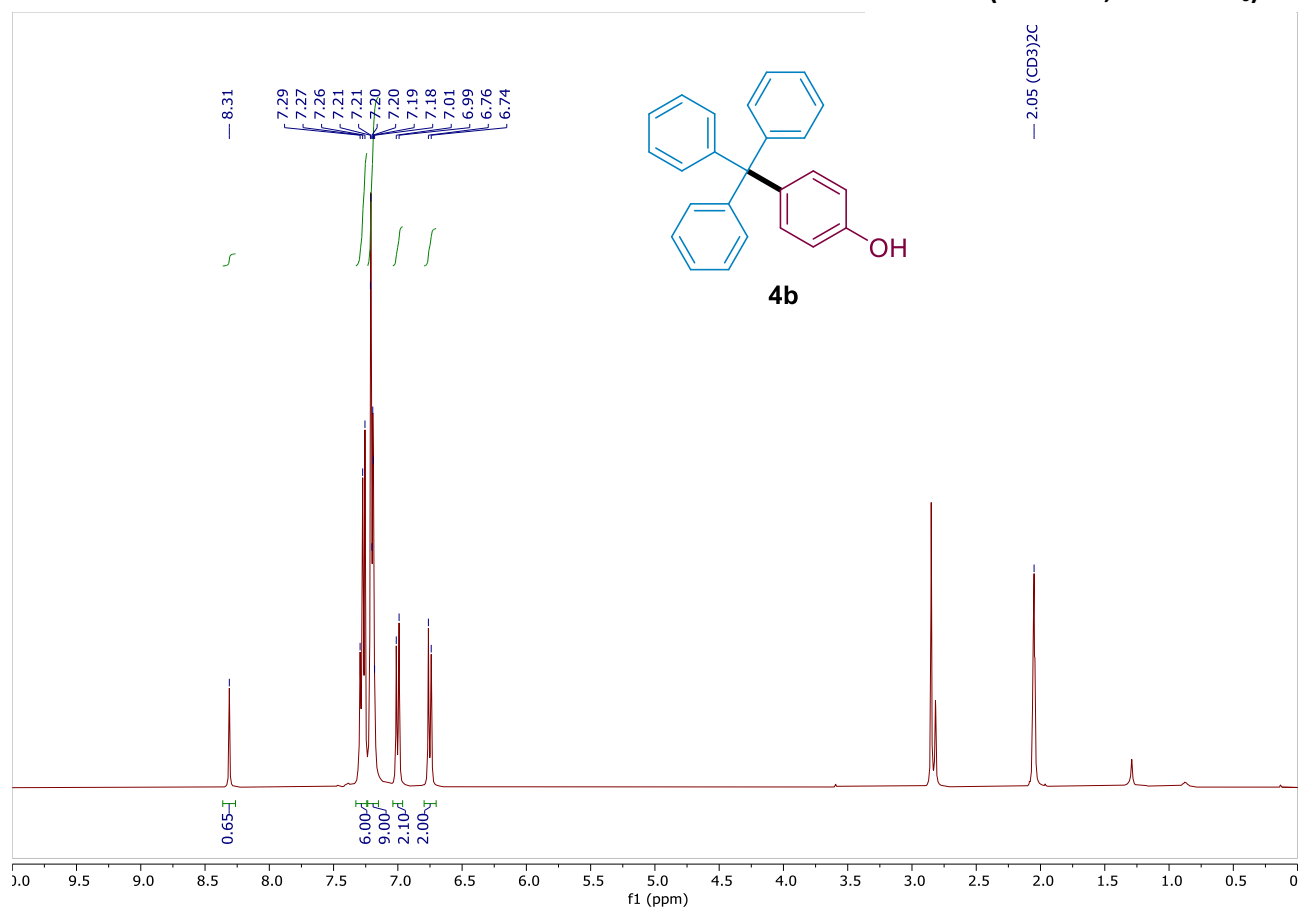

**<sup>13</sup>C NMR (125 MHz, acetone-d<sub>6</sub>)**

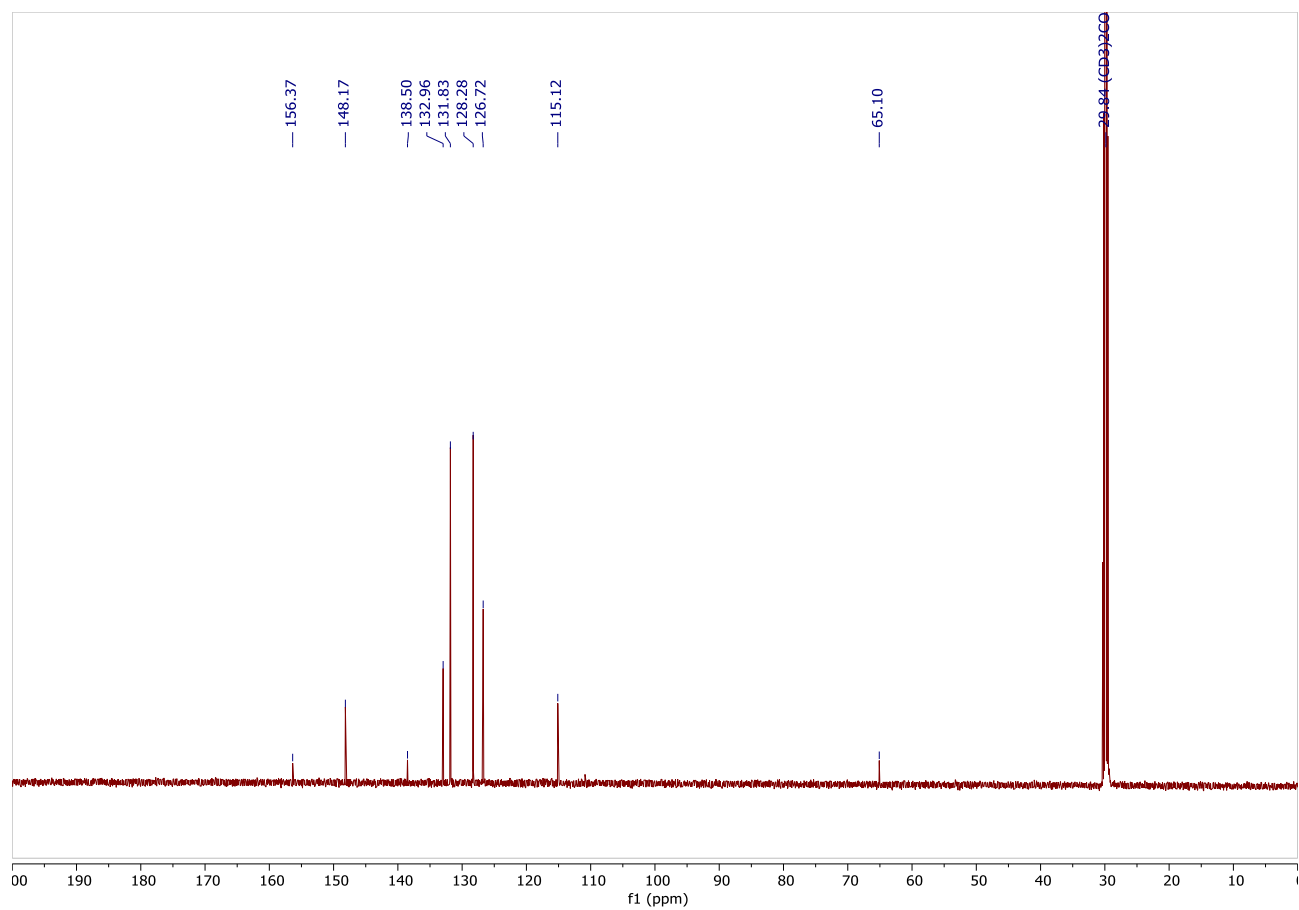

**<sup>1</sup>H NMR (400 MHz, CDCl<sub>3</sub>)**

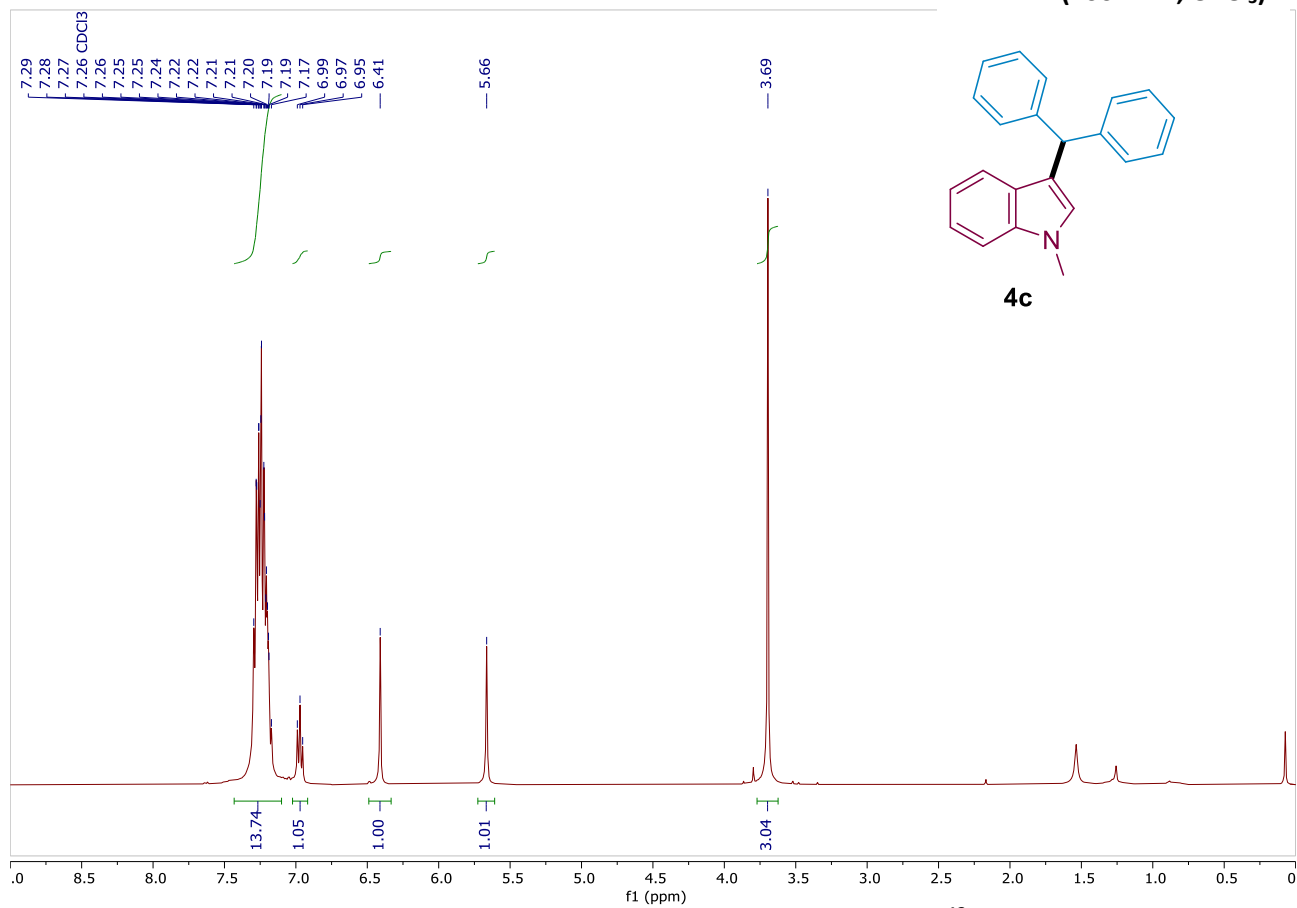

**<sup>13</sup>C NMR (125 MHz, CDCl<sub>3</sub>)**

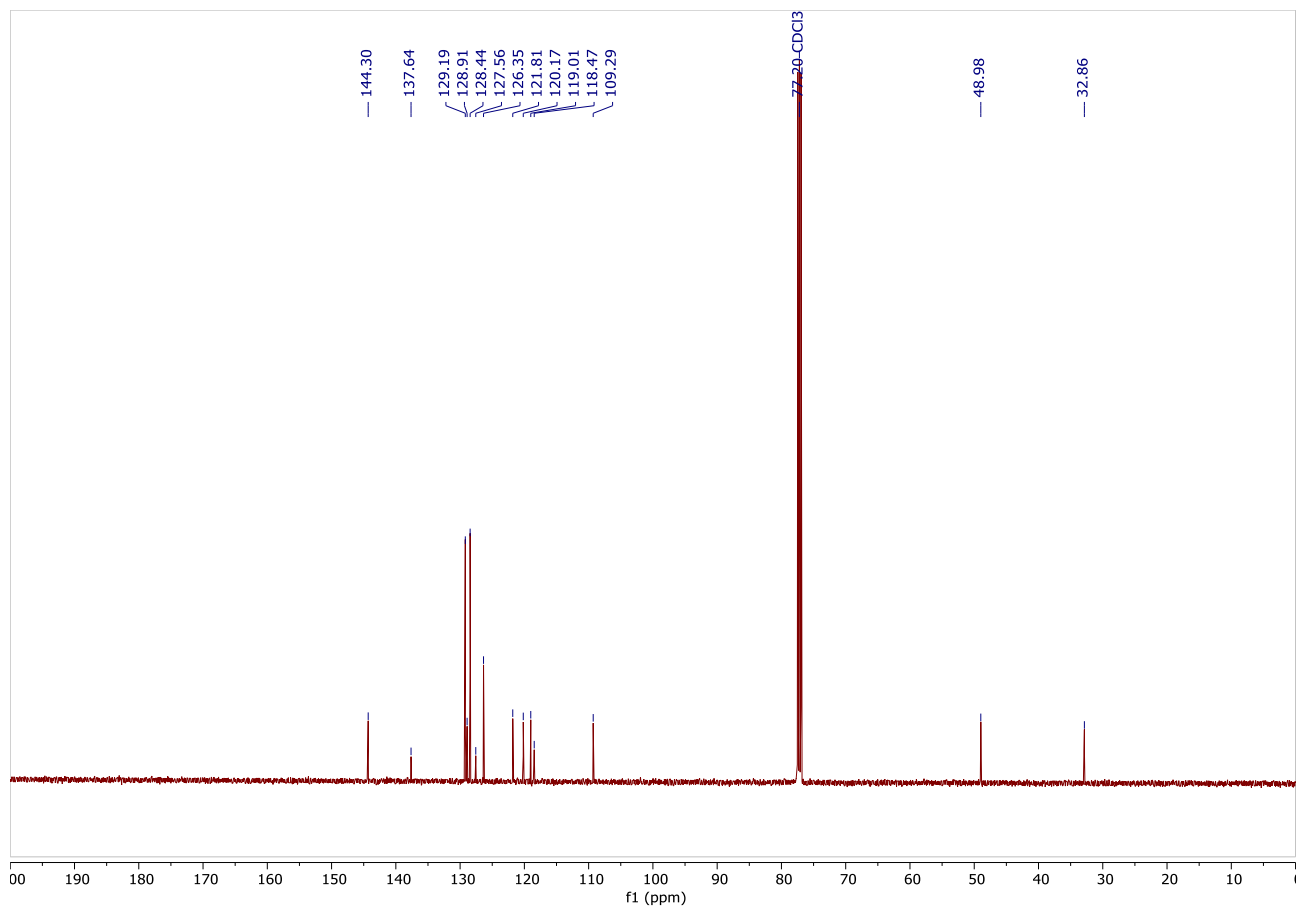

<sup>1</sup>H NMR (400 MHz, CDCl<sub>3</sub>)

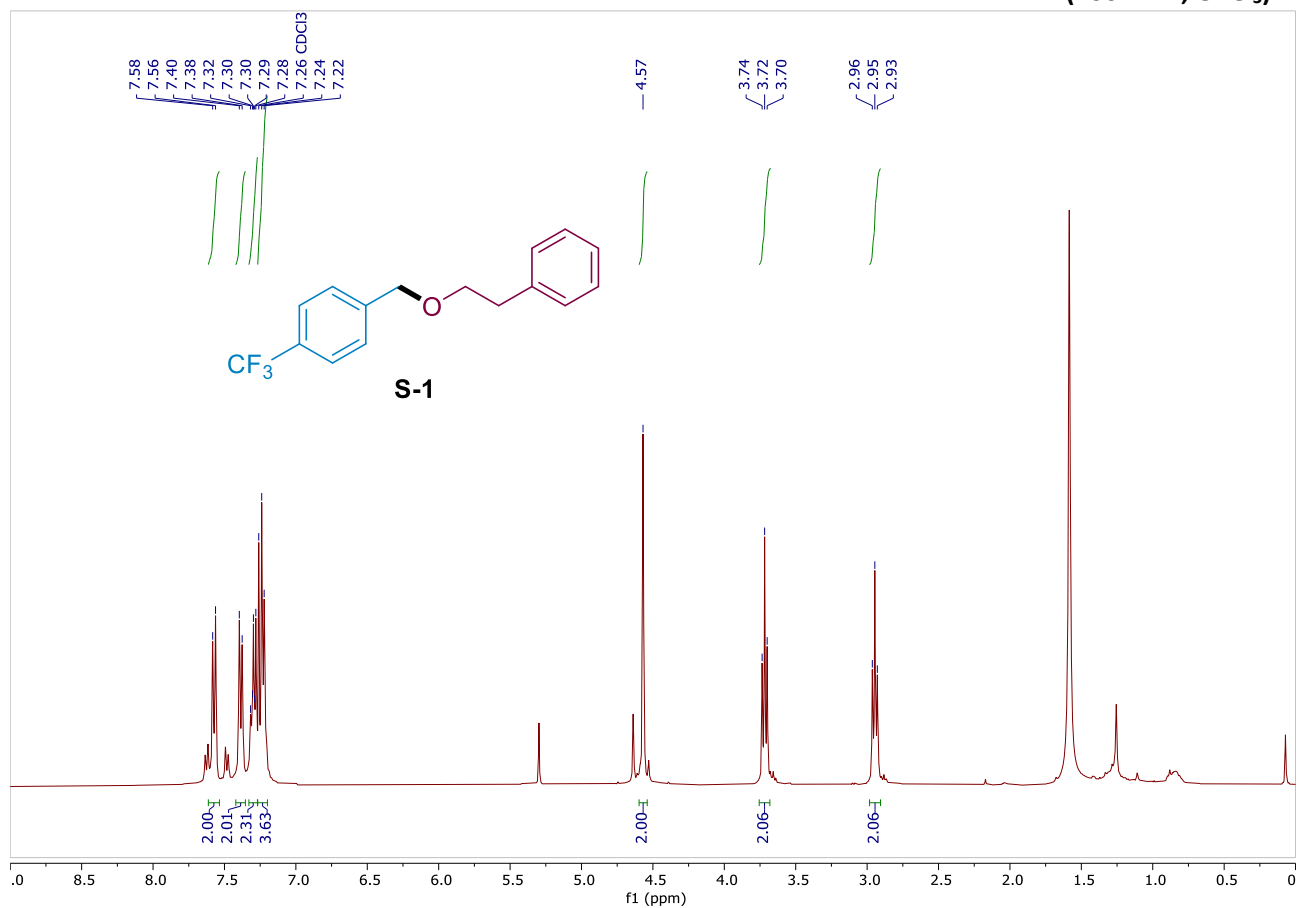

<sup>13</sup>C NMR (100 MHz, CDCl<sub>3</sub>)

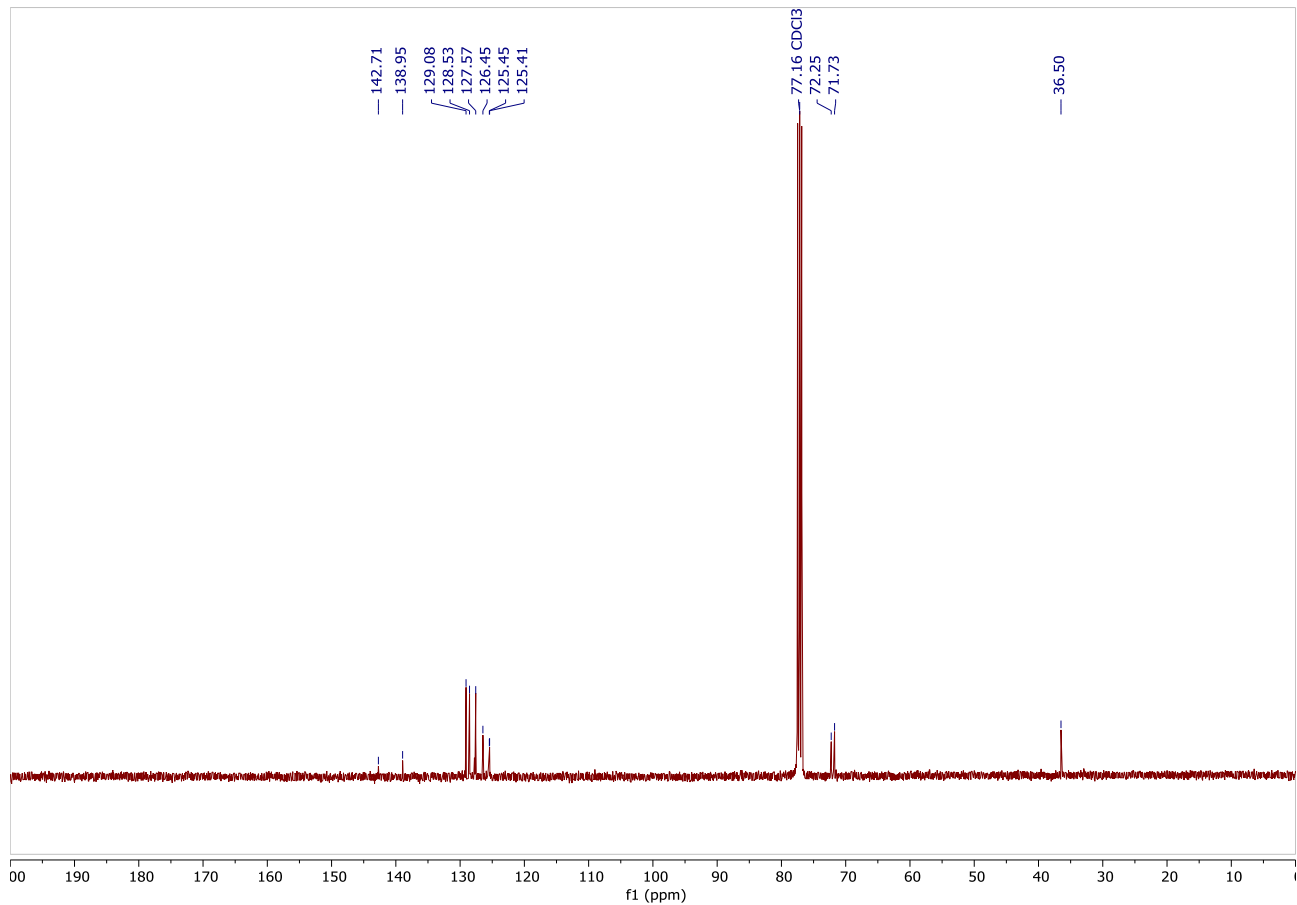

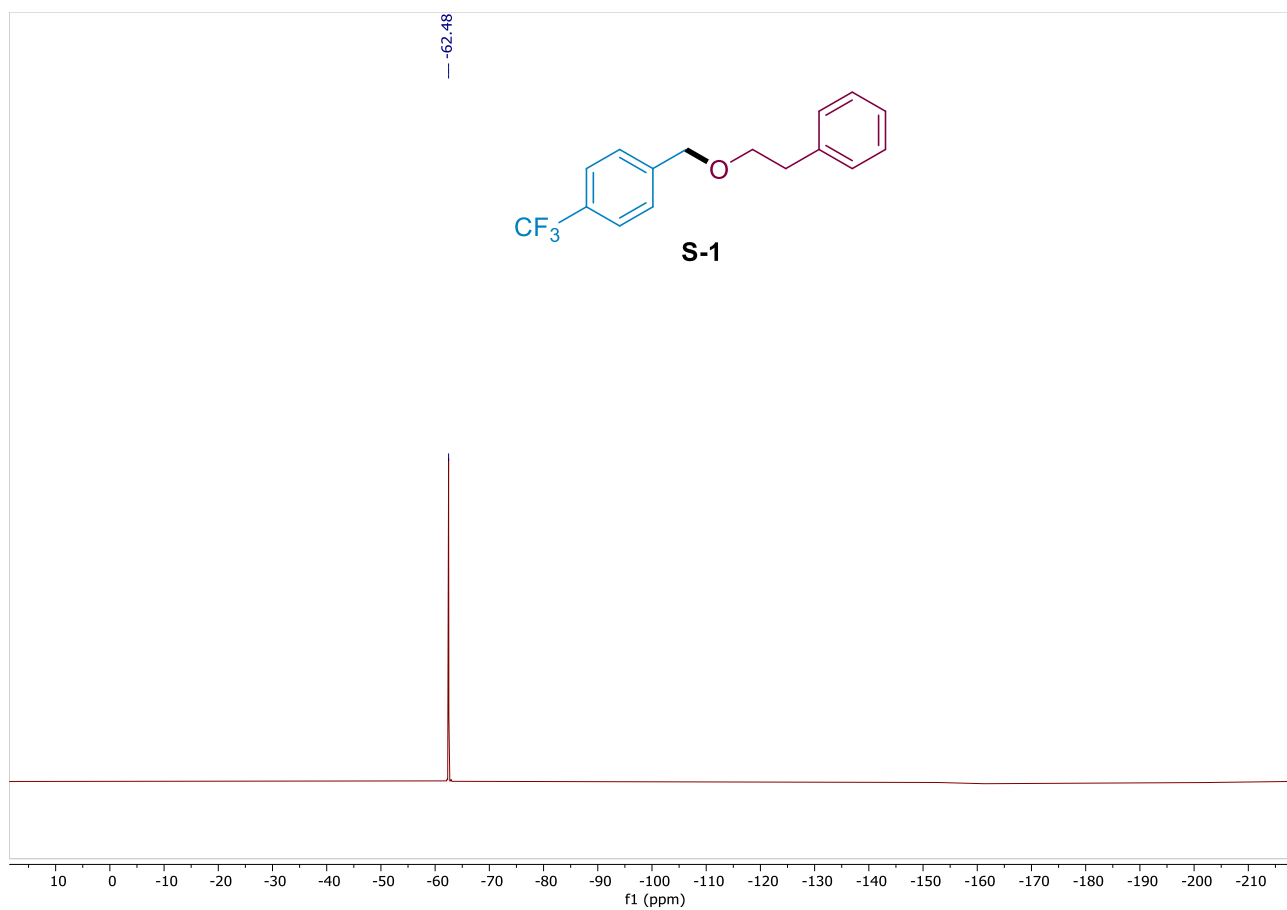

## 8. HPLC chromatograms

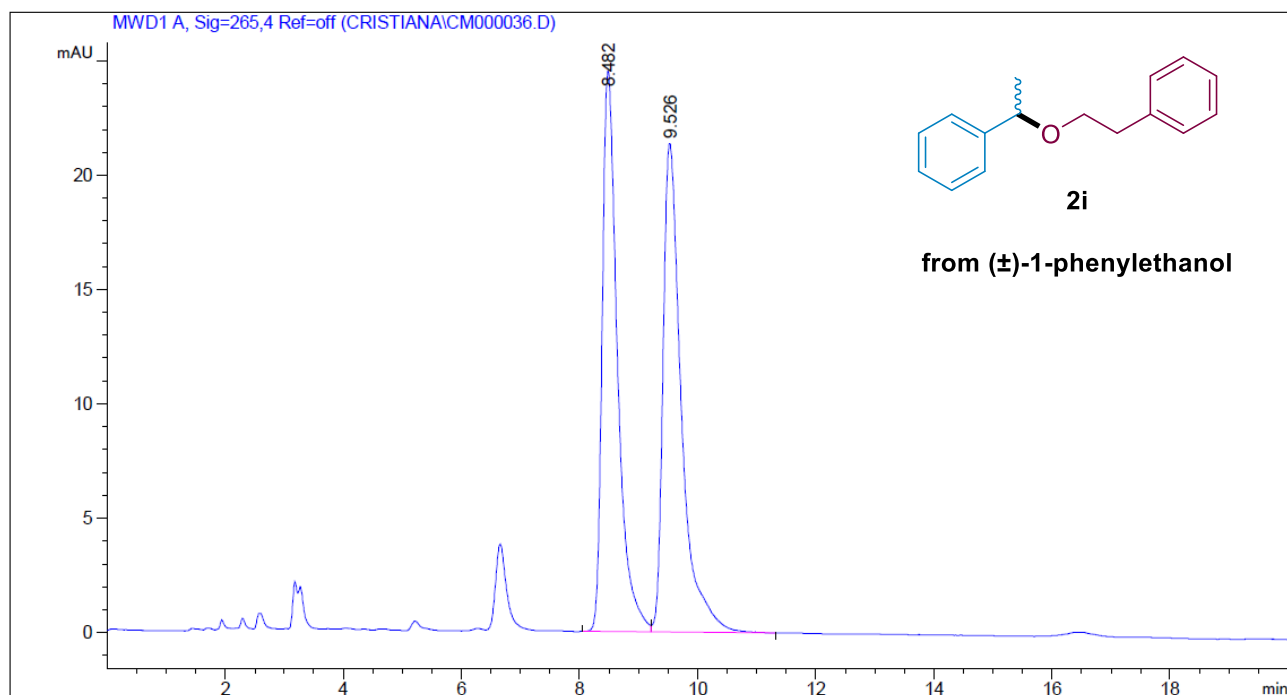

Signal 1: MWD1 A, Sig=265,4 Ref=off

| Peak # | RetTime [min] | Type | Width [min] | Area [mAU*s] | Height [mAU] | Area %  |
|--------|---------------|------|-------------|--------------|--------------|---------|
| 1      | 8.482         | BV   | 0.2706      | 442.54480    | 24.51878     | 48.9236 |
| 2      | 9.526         | VB   | 0.3241      | 462.01852    | 21.38008     | 51.0764 |

Totals : 904.56332 45.89885

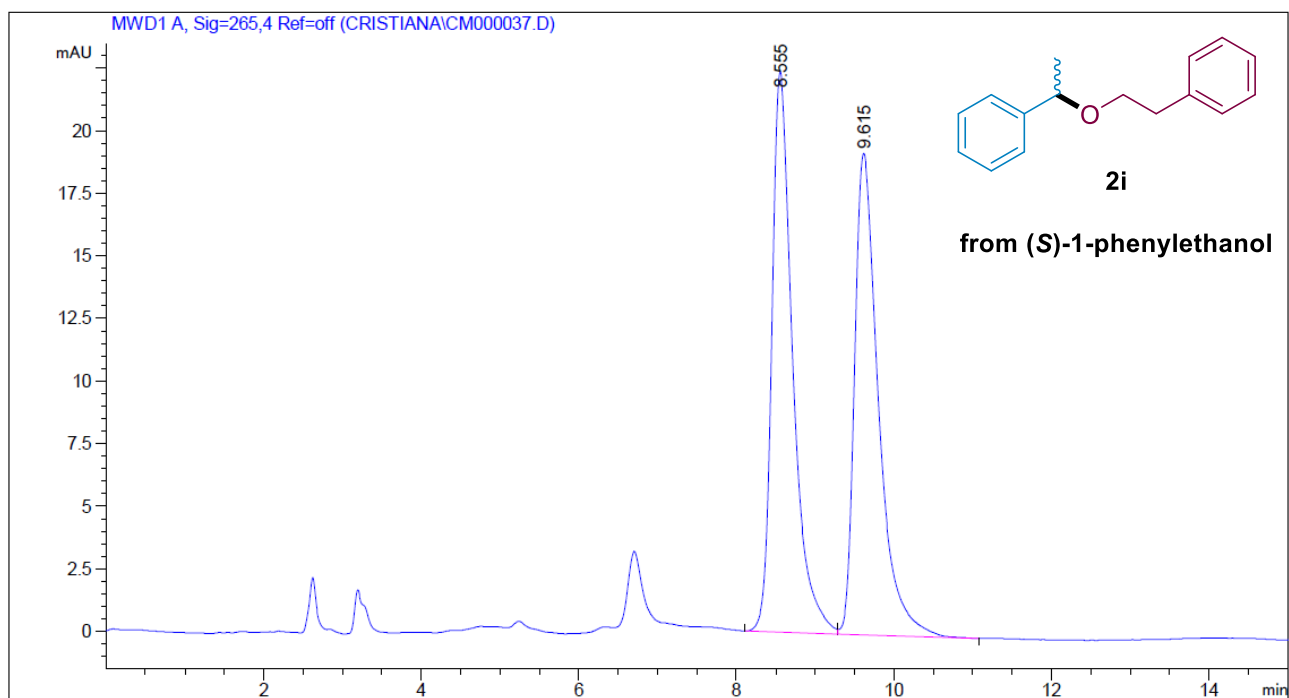

Signal 1: MWD1 A, Sig=265,4 Ref=off

| Peak # | RetTime [min] | Type | Width [min] | Area [mAU*s] | Height [mAU] | Area %  |
|--------|---------------|------|-------------|--------------|--------------|---------|
| 1      | 8.555         | BV   | 0.2775      | 413.32761    | 22.37652     | 50.5380 |
| 2      | 9.615         | VB   | 0.3174      | 404.52692    | 19.23355     | 49.4620 |

Totals : 817.85452 41.61007

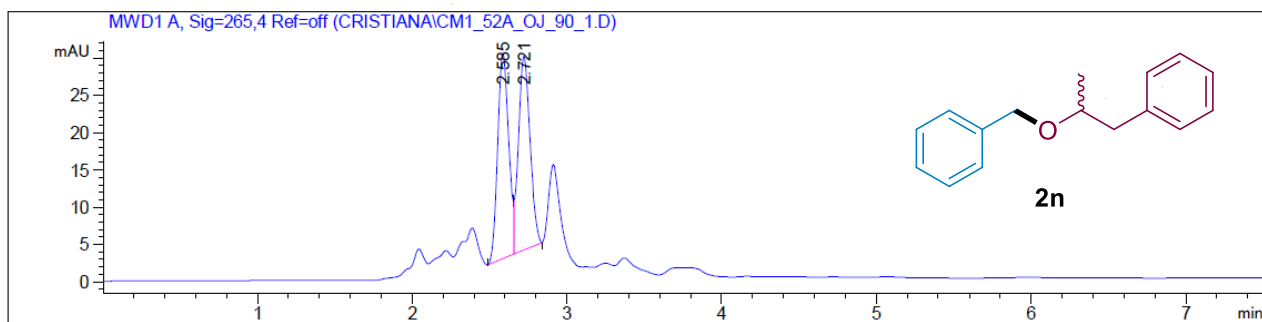

Signal 1: MWD1 A, Sig=265,4 Ref=off

| Peak # | RetTime [min] | Type | Width [min] | Area [mAU*s] | Height [mAU] | Area %  |
|--------|---------------|------|-------------|--------------|--------------|---------|
| 1      | 2.585         | BV   | 0.0746      | 133.70844    | 27.55894     | 49.7160 |
| 2      | 2.721         | VB   | 0.0806      | 135.23611    | 26.04620     | 50.2840 |

Totals : 268.94455 53.60514

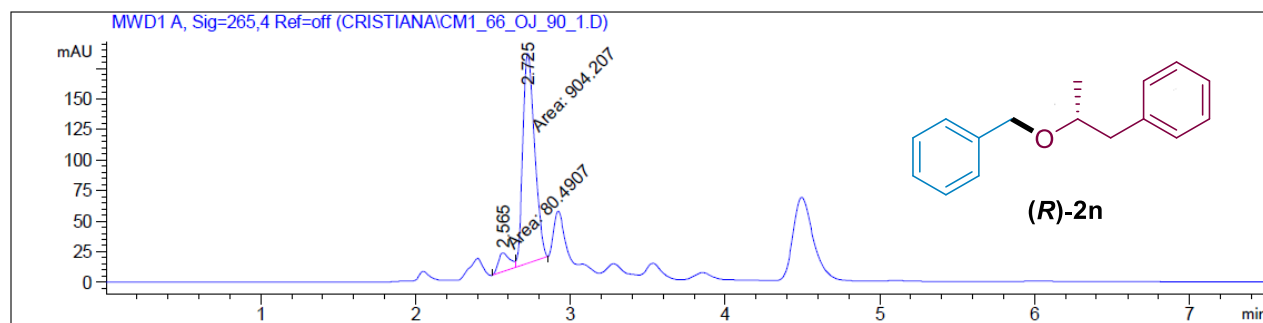

Signal 1: MWD1 A, Sig=265,4 Ref=off

| Peak # | RetTime [min] | Type | Width [min] | Area [mAU*s] | Height [mAU] | Area %  |
|--------|---------------|------|-------------|--------------|--------------|---------|
| 1      | 2.565         | MF   | 0.0853      | 80.49066     | 15.73408     | 8.1741  |
| 2      | 2.725         | FM   | 0.0872      | 904.20709    | 172.85590    | 91.8259 |

Totals : 984.69775 188.58997

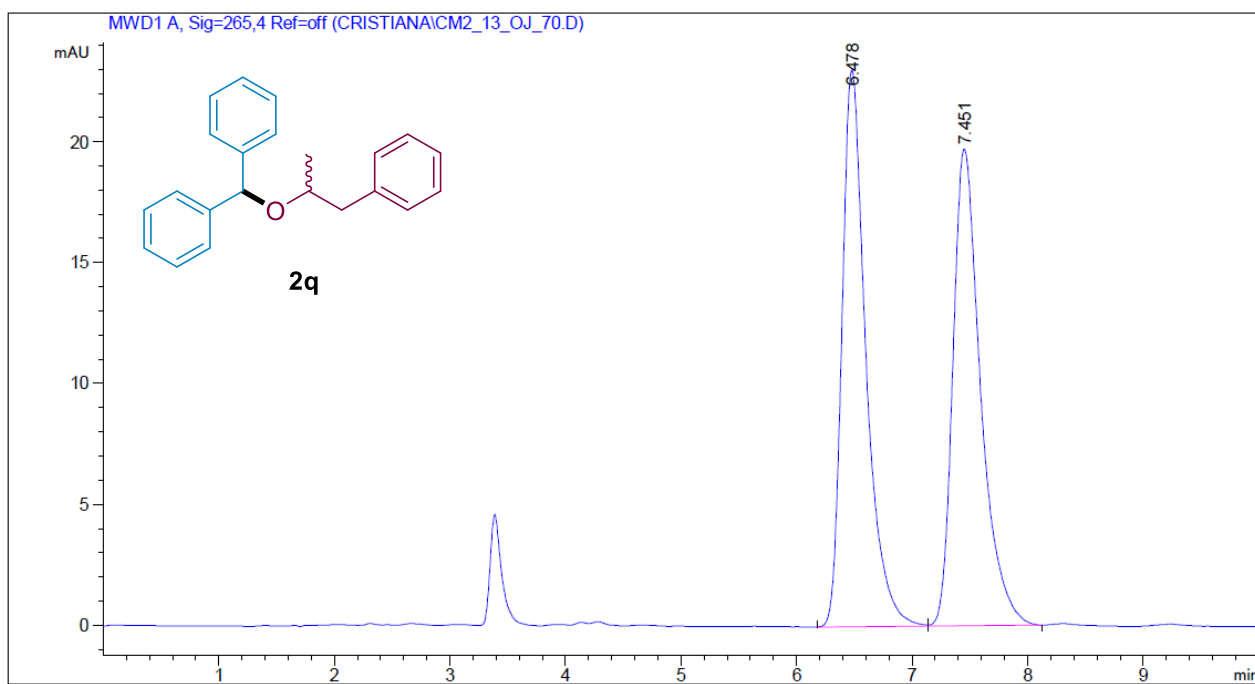

Signal 1: MWD1 A, Sig=265,4 Ref=off

| Peak # | RetTime [min] | Type | Width [min] | Area [mAU*s] | Height [mAU] | Area %  |
|--------|---------------|------|-------------|--------------|--------------|---------|
| 1      | 6.478         | BV   | 0.2157      | 331.19159    | 23.03609     | 50.1926 |
| 2      | 7.451         | VB   | 0.2503      | 328.64987    | 19.72999     | 49.8074 |

Totals : 659.84146 42.76608

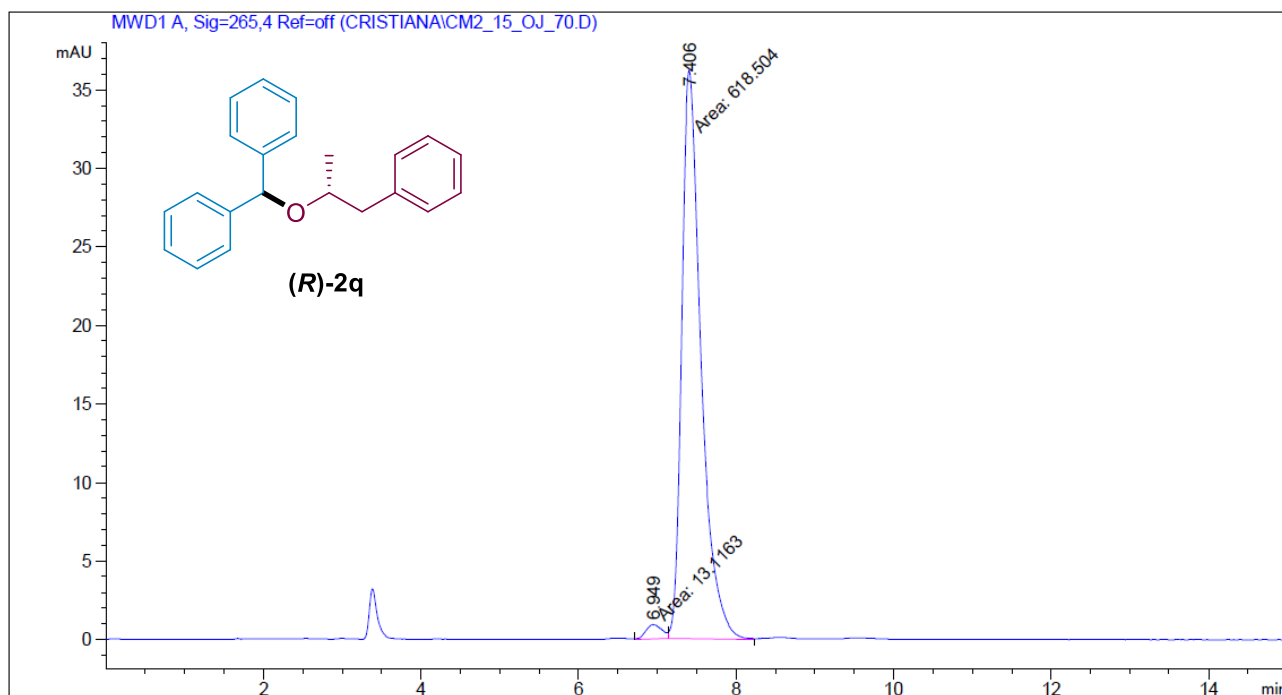

Signal 1: MWD1 A, Sig=265,4 Ref=off

| Peak # | RetTime [min] | Type | Width [min] | Area [mAU*s] | Height [mAU] | Area %  |
|--------|---------------|------|-------------|--------------|--------------|---------|
| 1      | 6.949         | MM   | 0.2401      | 13.11626     | 9.10289e-1   | 2.0766  |
| 2      | 7.406         | MM   | 0.2849      | 618.50433    | 36.18497     | 97.9234 |

Totals : 631.62060 37.09526
